# Supplementary material for: Effects of adjunctive brexpiprazole on sleep-wake and circadian parameters in youth with depressive disorders: study protocol for a clinical trial
Source: PubMed Central journal article supplement — BMJ Open. 2022 Sep 6;12(9):e056298. doi: 10.1136/bmjopen-2021-056298 (PMC9454051; doi:10.1136/bmjopen-2021-056298), 2022-09-06
Supplement: bmjopen-2021-056298.draft_revisions.pdf [file bmjopen-2021-056298.draft_revisions.pdf]

# BMJ Open

BMJ Open is committed to open peer review. As part of this commitment we make the peer review history of every article we publish publicly available.

When an article is published we post the peer reviewers' comments and the authors' responses online. We also post the versions of the paper that were used during peer review. These are the versions that the peer review comments apply to.

The versions of the paper that follow are the versions that were submitted during the peer review process. They are not the versions of record or the final published versions. They should not be cited or distributed as the published version of this manuscript.

BMJ Open is an open access journal and the full, final, typeset and author-corrected version of record of the manuscript is available on our site with no access controls, subscription charges or pay-per-view fees (<http://bmjopen.bmj.com>).

If you have any questions on BMJ Open's open peer review process please email [info.bmjopen@bmj.com](mailto:info.bmjopen@bmj.com)

# BMJ Open

## Effects of adjunctive brexpiprazole on sleep-wake and circadian parameters in youth with depressive syndromes: Study protocol for a clinical trial

|                               |                                                                                                                                                                                                                                                                                                                                                                                                                                                                                                                                                                                                                                                                                                                                                                                                                                                                                                                                                                                   |
|-------------------------------|-----------------------------------------------------------------------------------------------------------------------------------------------------------------------------------------------------------------------------------------------------------------------------------------------------------------------------------------------------------------------------------------------------------------------------------------------------------------------------------------------------------------------------------------------------------------------------------------------------------------------------------------------------------------------------------------------------------------------------------------------------------------------------------------------------------------------------------------------------------------------------------------------------------------------------------------------------------------------------------|
| Journal:                      | <i>BMJ Open</i>                                                                                                                                                                                                                                                                                                                                                                                                                                                                                                                                                                                                                                                                                                                                                                                                                                                                                                                                                                   |
| Manuscript ID                 | bmjopen-2021-056298                                                                                                                                                                                                                                                                                                                                                                                                                                                                                                                                                                                                                                                                                                                                                                                                                                                                                                                                                               |
| Article Type:                 | Protocol                                                                                                                                                                                                                                                                                                                                                                                                                                                                                                                                                                                                                                                                                                                                                                                                                                                                                                                                                                          |
| Date Submitted by the Author: | 12-Aug-2021                                                                                                                                                                                                                                                                                                                                                                                                                                                                                                                                                                                                                                                                                                                                                                                                                                                                                                                                                                       |
| Complete List of Authors:     | Carpenter, Joanne; University of Sydney Brain and Mind Research Institute, ;<br>Zmicerevska, Natalia; The University of Sydney, Brain and Mind Centre<br>Crouse, Jacob; The University of Sydney, Brain and Mind Centre<br>Garland, Alexandra; The University of Sydney, Brain and Mind Centre<br>Nichles, Alissa; The University of Sydney, Brain and Mind Centre<br>Song, Yun; The University of Sydney, Brain and Mind Centre<br>Wilson, Chloe; The University of Sydney Brain and Mind Centre<br>Rohleder, Cathrin; The University of Sydney, Brain and Mind Centre<br>McHugh, Catherine; The University of Sydney<br>Leweke, F. Markus; The University of Sydney, Brain and Mind Centre<br>Koethe, Dagmar; The University of Sydney, Brain and Mind Centre<br>Scott, Elizabeth; The University of Sydney, Brain and Mind Centre; The<br>University of Notre Dame Australia School of Medicine Sydney Campus<br>Hickie, Ian; The University of Sydney, Brain and Mind Centre; |
| Keywords:                     | MENTAL HEALTH, PSYCHIATRY, Depression & mood disorders < PSYCHIATRY                                                                                                                                                                                                                                                                                                                                                                                                                                                                                                                                                                                                                                                                                                                                                                                                                                                                                                               |
|                               |                                                                                                                                                                                                                                                                                                                                                                                                                                                                                                                                                                                                                                                                                                                                                                                                                                                                                                                                                                                   |

SCHOLARONE™  
Manuscripts

1  
2  
3  
4  
5  
6  
7  
8  
9  
10  
11  
12  
13  
14  
15  
16  
17  
18  
19  
20  
21  
22  
23  
24  
25  
26  
27  
28  
29  
30  
31  
32  
33  
34  
35  
36  
37  
38  
39  
40  
41  
42  
43  
44  
45  
46  
47  
48  
49  
50  
51  
52  
53  
54  
55  
56  
57  
58  
59  
60

**Effects of adjunctive brexpiprazole on sleep-wake and circadian parameters in youth with depressive syndromes: Study protocol for a clinical trial**

Joanne S Carpenter<sup>1</sup>, Natalia Zmicerevska<sup>1</sup>, Jacob J Crouse<sup>1</sup>, Alexandra Garland<sup>1</sup>, Alissa Nichles<sup>1</sup>, Yun Ju Christine Song<sup>1</sup>, Chloe Wilson<sup>1</sup>, Cathrin Rohleder<sup>1</sup>, Catherine M McHugh<sup>1</sup>, F Markus Leweke<sup>1</sup>, Dagmar Koethe<sup>1</sup>, Elizabeth M Scott<sup>2</sup>, Ian B Hickie<sup>1</sup>

<sup>1</sup>Youth Mental Health and Technology Team, Brain and Mind Centre, University of Sydney, Sydney, NSW, Australia.

<sup>2</sup>Notre Dame Medical School, Sydney, NSW, Australia

Corresponding author:

Natalia Zmicerevska

Brain and Mind Centre, The University of Sydney

94 Mallet St, Camperdown, Sydney, NSW Australia, 2050

[natalia.zmicerevska@sydney.edu.au](mailto:natalia.zmicerevska@sydney.edu.au)

Word Count (max 4,000): 3761 (without Abstract and Article Summary)

## ABSTRACT

### Introduction

Sleep-wake and circadian disturbance is a key feature of mood disorders with a potential causal role and particular relevance to young people. Brexpiprazole is an atypical antipsychotic medication with demonstrated efficacy as an adjunct to antidepressant treatment for Major Depressive Disorder (MDD) in adults, with preliminary evidence suggesting greater effectiveness in subgroups of depressed patients with sleep disturbances. This clinical trial aims to evaluate the relationships between changes in sleep-wake and circadian parameters and changes in depressive symptoms following adjunctive brexpiprazole treatment in young adults with MDD and sleep-wake disturbance.

### Methods and analysis

This study is designed as a 16 week (8 weeks active treatment, 8 weeks follow up) mechanistic, open-label, single-arm phase IV clinical trial and aims to recruit 50 young people aged 18 to 30 with MDD and sleep-wake cycle disturbance through an early intervention youth mental health clinic in Sydney, Australia. At baseline, participants will undergo multidimensional outcome assessment and subsequently receive 8 weeks of open-label treatment with brexpiprazole as adjunctive to their stable psychotropic medication. Following 4 weeks of treatment, clinical and self-report measures will be repeated. Ambulatory sleep-wake monitoring will be conducted continuously for the duration of treatment. After 8 weeks of treatment, all multidimensional outcome assessments will be repeated. Follow-up visits will be conducted 4 and 8 weeks after trial completion (including sleep-wake, clinical, and self-report assessments).

### Ethics and dissemination

This trial protocol has been approved by the Human Research Ethics Committee of the Sydney Local Health District (X19-0417 and 2019/ETH12986, Protocol Version v 1-3, dated 25.02.2021).

The results of this study, in de-identified form, will be disseminated through publication in peer-reviewed journals, scholarly book chapters, presentation at conferences and publication in conference proceedings.

## Trial Registration

Australian New Zealand Clinical Trials Registry (ANZCTR) Number: ACTRN12619001456145p, Date 22 October, 2019.

## KEYWORDS:

Mental health, adjunctive brexpiprazole, sleep-wake cycle, youth depression.

## ARTICLE SUMMARY

### Strengths and limitations of this study

- The use of comprehensive assessment battery, including actigraphy and circadian assessment, and collection of metabolic and inflammatory markers to help acquire a greater understanding of the mechanisms of antidepressant action of adjunctive brexpiprazole
- This trial will help to inform personalised treatment plans for specific clinical phenotypes, placing the participant at the centre of care
- As part of the study, all participants will receive a psychoeducational session about sleep and circadian rhythms with information on how to improve their sleep based on their actigraphy data

## INTRODUCTION

In young adults, Major Depressive Disorder (MDD) is highly prevalent, recurrent, and comorbid with other mental and physical conditions, generating a substantial burden of disease and disability [1, 2]. While multiple psychological and pharmacological treatments are commonly provided, a large proportion of patients with MDD fail to respond to first-line psychotherapy or antidepressant treatments [3-5], and augmentation with atypical antipsychotics is often recommended in these treatment-resistant cases [6]. Common features of depressive disorders are sleep-wake cycle disturbances, including not only insomnia [7-9], hypersomnia [10, 11], and abnormal sleep duration [7, 8], but also abnormal timing of 24-hour patterns of rest and activity [12, 13]. In addition, abnormalities

1  
2 in biological circadian rhythms have been reported in depressive disorders [14, 15], suggesting that in  
3  
4 some cases sleep disturbances are accompanied or underpinned by disturbances of the underlying  
5  
6 circadian timing system [16].  
7  
8  
9

10  
11 Adolescents and young adults are particularly vulnerable to circadian perturbations due to significant  
12  
13 developmental changes in circadian rhythms across this age period [17], and sleep-wake phase delays  
14  
15 are common in young people with depressive disorders [18]. Recently, we reported delayed and  
16  
17 disrupted circadian rhythms in a subgroup of young people with depressive disorders, and this group  
18  
19 also presented with greater symptom severity [19]. Furthermore, there is some evidence that correction  
20  
21 of circadian abnormalities is associated with antidepressant effects in response to treatments targeting  
22  
23 the circadian system such as Agomelatine [20] and bright light therapy [21].  
24  
25  
26  
27

28  
29 Brexpiprazole is an atypical antipsychotic with demonstrated efficacy as an adjunct to antidepressant  
30  
31 treatment in major depressive disorder in adults, as evidenced by multiple randomised controlled trials  
32  
33 [22-25], however the exact mechanism of antidepressant action is unknown [26]. The pharmacodynamic  
34  
35 properties of brexpiprazole, together with evidence from preclinical studies, suggest that there may be  
36  
37 specific effects on anxiety, cognitive function, and sleep [26, 27]. Further, there is preliminary evidence  
38  
39 to suggest that brexpiprazole may have greater effectiveness in subgroups of depressed patients with  
40  
41 sleep disturbances, anxiety, or irritability [16, 28].  
42  
43  
44  
45

46  
47 One previous study has investigated sleep disturbances in individuals with MDD treated with adjunctive  
48  
49 brexpiprazole and reported both reduced insomnia symptoms and improved daytime alertness [29].  
50  
51 This is consistent with effects on circadian rhythms, with potential influences on the entire 24-hour  
52  
53 pattern of rest and activity rather than simply on the sleep period in isolation. In order to improve the  
54  
55 personalisation of treatment selection for mood disorders, it is necessary to acquire a greater  
56  
57 understanding of the mechanisms of antidepressant action of specific compounds. As such, we aim to  
58  
59  
60

investigate whether the impact of brexpiprazole on depressive symptoms is linked to changes in sleep-wake cycle or circadian parameters in young people with MDD.

## **METHODS AND ANALYSIS**

### **Study Objectives**

The primary objective of this study is to determine if changes in depressive symptoms following adjunctive brexpiprazole treatment are correlated with changes in sleep-wake cycle or circadian parameters in young people with depressive syndromes.

The secondary objective is to determine if changes in social and occupational functioning following adjunctive brexpiprazole are correlated with changes in sleep-wake cycle or circadian parameters in young people with depressive syndromes.

The tertiary objectives of this study are to determine if changes in depressive symptoms or changes in sleep-wake cycle or circadian parameters following adjunctive brexpiprazole treatment are associated with a range of multidimensional outcome measures in young people with depressive syndromes[30]. These include other mental illness symptoms, self-harm and suicidal thoughts and behaviours, physical health parameters, alcohol and substance use, and genomic markers.

### **Trial design**

This investigator-initiated, mechanistic study involving 50 young people with depressive syndromes and sleep-wake cycle disturbances is designed as a 16-week (8 weeks active treatment, 8 weeks follow-up) open-label, single-arm, phase IV clinical trial.

### **Participants**

Participants aged 18 to 30 with a diagnosis of MDD according to DSM-5 criteria on a current antidepressant treatment of either selective serotonin reuptake inhibitor (SSRI) or serotonin-

1  
2 norepinephrine reuptake inhibitor (SNRI) with a disrupted sleep-wake cycle will be recruited through the  
3  
4 youth mental health clinics associated with the Brain and Mind Centre (BMC), University of Sydney. All  
5  
6 participants will provide written informed consent. The research team will make explicit to any potential  
7  
8 participants both verbally and in writing (in the Participant Information Statement) that participation is  
9  
10 voluntary and will not affect the patient's care received by the mental health service.  
11  
12  
13  
14

15 The inclusion criteria for this trial are: (i) aged 18 to 30, (ii) diagnosis of MDD as per DSM-5 (Structured  
16  
17 Clinical Interview for DSM; SCID[31]) criteria, (iii) current major depressive episode of moderate severity  
18  
19 as defined by a Quick Inventory of Depressive Symptomatology (QIDS)[32] rating  $\geq 11$  at two  
20  
21 assessments two weeks apart, (iv) failure to respond to at least one adequate (minimum four weeks)  
22  
23 trial of pharmacological treatment, (v) current antidepressant treatment with SSRI or SNRI for at least 6  
24  
25 weeks, at a stable dose for two weeks prior to study commencement, and (vi) a perturbed sleep-wake  
26  
27 cycle as evidenced by: delayed sleep onset; delayed sleep offset; disrupted sleep; high day-to-day  
28  
29 variability of sleep-wake cycle; non-restorative sleep; or daytime fatigue.  
30  
31  
32  
33  
34

35 Exclusion criteria are: (i) any adjunctive antipsychotic treatment for current episode in the past month,  
36  
37 (ii) use of medications which affect sleep, (iii) primary psychotic disorder diagnosis, (iv) acute suicidal  
38  
39 behaviour (score of 6 on Comprehensive Assessment of At-Risk Mental States (CAARMS) item 7.3[33]),  
40  
41 (v) medical condition contributing to sleep-wake dysfunction, (vi) significant alcohol or substance misuse  
42  
43 or dependence (assessed via DSM-5 SCID[31] and World Health Organisation Alcohol, Smoking and  
44  
45 Substance Involvement Screening Test (WHO-ASSIST[34, 35]), (vii) shift work or (viii) recent  
46  
47 transmeridian travel, (ix) previous hypersensitivity to brexpiprazole, (x) taking CYP2D6 or CYP3A4  
48  
49 inhibitors, and (xi) pregnancy or lactation.  
50  
51  
52  
53  
54

### 55 **Study course and procedure**

56  
57 Patients presenting for mental health care who may be eligible for the study will be screened by phone  
58  
59 before being invited to participate and attending an enrolment visit. The enrolment visit will formally assess  
60



1  
2 eligibility criteria and confirm the presence of MDD as per DSM-5 (SCID)[31]. Participants will be provided  
3  
4 with an actigraphy device (non-invasive, wrist-worn device used to objectively measure activity and sleep  
5  
6 patterns) and will be given instructions to wear the device for the following two week period.  
7  
8  
9

10  
11 *Visit 1 (Baseline):* Within two weeks of completing the diagnostic and screening assessments, data from  
12  
13 the actigraphy device will be downloaded and reviewed. A further assessment of depressive symptom  
14  
15 severity (QIDS Clinician-Rated; QIDS-CR)[32] will be conducted to ensure that participants meet all  
16  
17 inclusion criteria. Bloods will be collected for the assessment of metabolic and inflammatory measures,  
18  
19 and genomic analysis. Clinical and self-report assessments will be conducted, as well as circadian  
20  
21 assessments in which the participant will remain in the sleep lab overnight. The following morning,  
22  
23 participants will attend a 1-hour psychoeducation session about sleep and circadian rhythms covering  
24  
25 the following topics: i) sleep and circadian education with tailored discussion based on their personal  
26  
27 actigraphy data; ii) individualized plan for progressive sleep rescheduling; and iii) lifestyle factors and  
28  
29 behaviours impacting on sleep (e.g. exercise, light, sleep environment, sleep regulation, foods, stress,  
30  
31 anxiety, mood).  
32  
33  
34  
35  
36  
37

38 Once all baseline clinical and self-report assessments have been conducted, and the medical assessment  
39  
40 completed by the study doctor to confirm the inclusion and exclusion criteria, participants will be issued  
41  
42 with the study medication to receive 8 weeks of open-label pharmacotherapy with brexpiprazole  
43  
44 (REXULTI®-Lundbeck) as adjunctive to their stable psychotropic medication (treatment as usual).  
45  
46 Brexpiprazole will be provided to participants at Visit 1 (Baseline) and Visit 2 (Week 4) for the following  
47  
48 four weeks and will be titrated from 1 mg once daily in week 1, to 2 mg once daily in weeks 2-8.  
49  
50  
51  
52

53 *Monitoring visits:* Participants will be contacted by telephone on a weekly basis for the duration of the 8  
54  
55 week treatment period to monitor adverse events and adherence. Any changes in concomitant  
56  
57 medications will also be investigated and recorded. In addition, participants will be provided with a  
58  
59 medication diary and asked to complete during the study to monitor adherence.  
60

1  
2 More detailed information about potential side-effects will be further assessed by the study doctor at visits  
3  
4 2, 3, 4 and 5 using the UKU Side Effect Rating Scale [36], Abnormal Involuntary Movement Scale (AIMS) [37]  
5  
6 and the Simpson-Angus Scale (SAS) [38] for evaluation of extrapyramidal symptoms (EPS).  
7  
8  
9

10  
11 *Visit 2 (Week 4):* Following four weeks of the treatment phase, participants will return to BMC, where  
12  
13 clinical and self-report assessments will be completed to assess changes in clinical and functional  
14  
15 measures.  
16

17  
18  
19  
20 *Visit 3 (Week 8):* Following eight weeks of the treatment phase, participants will return again to  
21  
22 complete clinical and self-report assessments, and will also complete a second circadian (overnight) in-  
23  
24 lab assessments. Bloods will be collected at this visit for follow-up metabolic and inflammatory markers.  
25  
26

27  
28  
29 *Visit 4 and 5 (Follow-up visits 1 and 2, 12 and 16 weeks respectively):* Twelve and sixteen weeks after  
30  
31 commencing treatment (i.e. four and eight weeks after completing the eight-week treatment period  
32  
33 respectively), participants will return to BMC and complete clinical and self-report assessments.  
34  
35 Participants will be provided with an actigraphy device to wear for two weeks prior to these  
36  
37 assessments.  
38  
39

40  
41  
42 Participants will be reimbursed for their time and the cost of transportation to and from the BMC and/or  
43  
44 sleep labs.  
45  
46

## 47 48 49 **Outcomes**

### 50 51 52 53 **Primary Outcome Measures**

54  
55 The primary endpoint will be the correlation between change in sleep-wake and circadian parameters and  
56  
57 change in depressive symptoms from baseline to week eight.  
58  
59  
60

1  
2 Notably, the primary depressive symptom measures (QIDS-CR total score, QIDS-Self Report (QIDS-SR) total  
3 score, The Montgomery-Åsberg Depression Rating Scale (MADRS) total score) contain sleep items. These  
4 will be removed from these scales for analyses to provide a measure of depressive symptoms that is not  
5  
6 biased by changes in sleep-wake parameters.  
7  
8  
9

10  
11  
12  
13 Primary sleep-wake and circadian variables of interest include actigraphy parameters, as well as in-lab  
14  
15 circadian and self-report measures.  
16

### 17 18 19 20 **Secondary Outcome Measures**

21  
22 The secondary endpoint will be correlation between change in sleep-wake and circadian parameters and  
23  
24 change in functioning from baseline to week eight.  
25

### 26 27 28 29 **Tertiary Outcome Measures**

30  
31 Tertiary endpoints will be correlation between change in sleep-wake and circadian parameters and other  
32  
33 multidimensional outcome measures based on assessments of symptoms, self-harm and suicidal thoughts  
34  
35 and behaviours, physical health, and alcohol and substance use.  
36

37  
38  
39  
40 Further tertiary endpoints will be comparison of primary endpoints between Clinical Stages [39-42], illness  
41  
42 trajectories [43], and genomic variants with potential relevance to mood disorders and/or circadian  
43  
44 rhythms (e.g. CLOCK, BMAL1).  
45

46  
47  
48  
49 Detailed outcome measures are summarized in Table 1.  
50  
51  
52  
53  
54  
55  
56  
57  
58  
59  
60

**Table 1 – Primary, Secondary and Tertiary Outcome Measures**

| <b>Primary Outcome Measures</b><br>(Correlation between change in sleep-wake and circadian parameters and change in depressive symptoms from baseline to week eight)                                                                                                                                                                                                                                                                                                                                                                                                                                                                                                                                                                                                                                                                                                                                                                                                                                                                                                                                                                  | <b>Secondary Outcome Measures</b><br>(Correlation between change in sleep-wake and circadian parameters and change in functioning from baseline to week eight)                                                                                                                                                                                                                                                                                                         | <b>Tertiary Outcome measures</b><br>(Correlation between change in sleep-wake and circadian parameters and other multidimensional outcome measures)                                                                                                                                                                                                                                                                                                                                                                                                                                                                                                                                                                                                                                                                                                                                                                                                                                                                                                                                                                                                                                                 |
|---------------------------------------------------------------------------------------------------------------------------------------------------------------------------------------------------------------------------------------------------------------------------------------------------------------------------------------------------------------------------------------------------------------------------------------------------------------------------------------------------------------------------------------------------------------------------------------------------------------------------------------------------------------------------------------------------------------------------------------------------------------------------------------------------------------------------------------------------------------------------------------------------------------------------------------------------------------------------------------------------------------------------------------------------------------------------------------------------------------------------------------|------------------------------------------------------------------------------------------------------------------------------------------------------------------------------------------------------------------------------------------------------------------------------------------------------------------------------------------------------------------------------------------------------------------------------------------------------------------------|-----------------------------------------------------------------------------------------------------------------------------------------------------------------------------------------------------------------------------------------------------------------------------------------------------------------------------------------------------------------------------------------------------------------------------------------------------------------------------------------------------------------------------------------------------------------------------------------------------------------------------------------------------------------------------------------------------------------------------------------------------------------------------------------------------------------------------------------------------------------------------------------------------------------------------------------------------------------------------------------------------------------------------------------------------------------------------------------------------------------------------------------------------------------------------------------------------|
| <p><b>Primary depressive symptom measures:</b></p> <ul style="list-style-type: none"> <li>• QIDS-CR total score (minus sleep items)</li> <li>• QIDS-Self Report (QIDS-SR) total score (minus sleep items)</li> <li>• The Montgomery-Åsberg Depression Rating Scale (MADRS) total score (minus sleep items)</li> </ul> <p><b>Primary sleep-wake and circadian variables of interest:</b></p> <p>Actigraphy parameters (in the two-week period prior to baseline and prior to week eight):</p> <ul style="list-style-type: none"> <li>• Sleep onset time</li> <li>• Sleep offset (wake) time</li> <li>• Total sleep time (duration)</li> <li>• Wake after sleep onset (estimation of number of minutes awake during the sleep period)</li> <li>• Sleep efficiency (% of sleep period estimated as sleep)</li> <li>• Inter-daily stability</li> <li>• Intra-daily variability</li> </ul> <p><b>In-lab circadian measures:</b></p> <ul style="list-style-type: none"> <li>• Dim Light Melatonin Onset (DLMO) timing</li> <li>• Phase angle (time lapse) between DLMO and habitual sleep</li> <li>• Core body temperature nadir</li> </ul> | <p><b>Functioning measures:</b></p> <ul style="list-style-type: none"> <li>• Social and Occupational Functioning Assessment Scale (SOFAS) rating</li> <li>• The Work and Social Adjustment Scale (WSAS) total score</li> <li>• Adapted Schuster Social Support Scale (SSSS) total score</li> <li>• Not in Education, Employment, or Training (NEET) status</li> <li>• Number of days 'out of role' (unable to perform usual activities) in the past 30 days</li> </ul> | <p><b>Symptom Measures:</b></p> <ul style="list-style-type: none"> <li>• Young Mania Rating Scale (YMRS) total score</li> <li>• Brief Psychiatric Rating Scale (BPRS) total score and subscale scores</li> <li>• Overall Anxiety Severity Impairment Scale (OASIS) total score</li> <li>• Altman Self-Rating Mania scale (ASRM) total score</li> <li>• Prodromal Questionnaire (brief version) (PQ-16) total score</li> <li>• DSM-5 Primary Care Post-Traumatic Stress Disorder screen (PC-PTSD-5) total score</li> <li>• Adapted Eating Disorder Examination (EDE) total score</li> <li>• Clinical Global Impressions scale (CGI) severity and improvement scores</li> </ul> <p><b>Self-harm and suicidal thoughts and behaviours:</b></p> <ul style="list-style-type: none"> <li>• Suicidal risk (score from Suicidal Ideation Attributes Scale (SIDAS) and Columbia-Suicide Severity Rating Scale (C-SSRS) items)</li> <li>• Adapted Brief Non-Suicidal Self-Injury Assessment Tool (B-NSSI-AT) total score</li> </ul> <p><b>Physical Health:</b></p> <ul style="list-style-type: none"> <li>• Body Mass Index (BMI) calculated from height and weight</li> <li>• Waist circumference</li> </ul> |

|                                                                                                                                                                                                                                                                                                                                                                                                                                                                                                                                                                                                                                                                                             |  |                                                                                                                                                                                                                                                                                                                                                                                                                                                                                                                                                                                                                                                                                                                                                                                                                                                                                                                                                                                                                                                                                                                                                                                                                                                                                           |
|---------------------------------------------------------------------------------------------------------------------------------------------------------------------------------------------------------------------------------------------------------------------------------------------------------------------------------------------------------------------------------------------------------------------------------------------------------------------------------------------------------------------------------------------------------------------------------------------------------------------------------------------------------------------------------------------|--|-------------------------------------------------------------------------------------------------------------------------------------------------------------------------------------------------------------------------------------------------------------------------------------------------------------------------------------------------------------------------------------------------------------------------------------------------------------------------------------------------------------------------------------------------------------------------------------------------------------------------------------------------------------------------------------------------------------------------------------------------------------------------------------------------------------------------------------------------------------------------------------------------------------------------------------------------------------------------------------------------------------------------------------------------------------------------------------------------------------------------------------------------------------------------------------------------------------------------------------------------------------------------------------------|
| <p>• Evening cortisol area under the curve</p> <p><b>Self-report measures:</b></p> <ul style="list-style-type: none"> <li>• Non-restorative sleep score (based on the Pittsburgh Sleep Quality Index (PSQI), and Munich Chronotype Questionnaire (MCTQ))</li> <li>• <i>Pittsburgh Sleep Quality Index</i> (PSQI) total score</li> <li>• Epworth Sleepiness Score (ESS) total score</li> <li>• Insomnia Severity Index (ISI) total score</li> <li>• Morningness -Eveningness Questionnaire (MEQ) total score*</li> <li>• Seasonal Pattern Assessment Questionnaire (SPAQ) total score*</li> </ul> <p>*baseline scores will be used rather than change scores as these are trait measures</p> |  | <ul style="list-style-type: none"> <li>• International Physical Activity Questionnaire (IPAQ) total score</li> <li>• Metabolic blood markers including triglycerides, cholesterol (total, Low Density Lipoprotein (LDL), High Density Lipoprotein (HDL)), and Homeostasis Model of Insulin Resistance (HOMA2-IR) calculated from fasting glucose and insulin measures</li> <li>• Inflammatory blood markers including Interleukin-1<math>\beta</math> (IL-1<math>\beta</math>), Interleukin-6 (IL-6), Tissue Necrosis Factor (TNF-<math>\alpha</math>), C-Reactive Protein (CRP)</li> </ul> <p><b>Alcohol and Substance Use:</b></p> <ul style="list-style-type: none"> <li>• World Health Organisation Alcohol, Smoking, and Substance Involvement Screening Test (WHO ASSIST) score for tobacco, and cannabis</li> <li>• Alcohol Use Disorders Identification Test-Consumption (AUDIT C) total score</li> <li>• WHO ASSIST alcohol-related impairment</li> <li>• Age of onset of alcohol use</li> </ul> <p><b>Comparison of primary endpoints between:</b></p> <ul style="list-style-type: none"> <li>• Clinical Stages</li> <li>• Illness Trajectories</li> <li>• Genomic variants with potential relevance to mood disorders and/or circadian rhythms (e.g. CLOCK, BMAL1).</li> </ul> |
|---------------------------------------------------------------------------------------------------------------------------------------------------------------------------------------------------------------------------------------------------------------------------------------------------------------------------------------------------------------------------------------------------------------------------------------------------------------------------------------------------------------------------------------------------------------------------------------------------------------------------------------------------------------------------------------------|--|-------------------------------------------------------------------------------------------------------------------------------------------------------------------------------------------------------------------------------------------------------------------------------------------------------------------------------------------------------------------------------------------------------------------------------------------------------------------------------------------------------------------------------------------------------------------------------------------------------------------------------------------------------------------------------------------------------------------------------------------------------------------------------------------------------------------------------------------------------------------------------------------------------------------------------------------------------------------------------------------------------------------------------------------------------------------------------------------------------------------------------------------------------------------------------------------------------------------------------------------------------------------------------------------|

## Assessments

Assessments used in this trial are based on the multidimensional assessment and outcomes framework [30] and include clinical ratings of mental health symptoms, social and occupational functioning, self-

1  
2 harm, suicidal thoughts and behaviours, self-report questionnaires, physical health parameters, alcohol  
3  
4 and substance use, illness type, stage and trajectory, as well as circadian parameters and metabolic,  
5  
6 inflammatory and genomic markers.  
7  
8  
9

10  
11 Our recent research[30, 44-46] indicates the capacity of the multidimensional outcomes framework to  
12  
13 further deepen our understanding of the pathophysiological mechanisms and illness progression in this  
14  
15 cohort, as well as to inform more personalized and measurement-based models of care.  
16  
17

### 18 19 20 Diagnostic assessments

21  
22 The presence of MDD and any comorbidity will be evaluated using the Structured Clinical Interview for  
23  
24 DSM-5 Axis I Disorders (SCID) [31]. The diagnostic assessment is expected to take 30-75 minutes to  
25  
26 complete.  
27  
28  
29

### 30 31 Mental Risk Assessment

32  
33 Acute suicidal behaviour will be assessed by relevant subscale of the Comprehensive Assessment of At-  
34  
35 Risk Mental States (CAARMS) [33]. The mental risk assessment is expected to take 5 minutes to  
36  
37 complete.  
38  
39  
40

### 41 42 Clinical Assessments

- 43  
44 1. *Clinical-rated Quick Inventory of Depressive Symptomatology (QIDS-CR)* [32], a rating scale that  
45  
46 assesses the nine criterion symptom domains designated by the DSM to diagnose a major depressive  
47  
48 episode.  
49
- 50  
51 2. *Montgomery-Åsberg Depression Rating Scale (MADRS)* [47] will also be used to assess depressive  
52  
53 symptoms, to allow for direct comparisons with previous studies of brexpiprazole in MDD.  
54
- 55  
56 3. *Young Mania Rating Scale (YMRS)* [48], an eleven-item, multiple-choice diagnostic questionnaire  
57  
58 which psychiatrists use to measure the severity of manic episodes in patients.  
59  
60

1  
2 4. *Brief Psychiatric Rating Scale (BPRS)* [49], a rating scale used to measure psychiatric symptoms  
3  
4 such as depression, anxiety, hallucinations and unusual behaviour.

5  
6 5. *Social and Occupational Functioning Assessment Scale (SOFAS)* [50] a clinician-rated measure will  
7  
8 assess functioning on a 0 to 100 scale, with lower scores suggesting more severe impairment.

9  
10 6. *Clinical Global Impressions scale (CGI)* [51] will be used as a measure of clinical improvement.

11  
12 7. Participants will also be rated on previously established *clinical stage* [39-42] and *illness trajectory*  
13  
14 [43] models on the basis of information collected throughout the clinical interview.

15  
16 8. *World Health Organisation (WHO) Alcohol, Smoking and Substance Involvement Screening Test*  
17  
18 (*WHO-ASSIST*) [34, 35]: a reliable, culturally adaptable, valid screening test for problematic or risky  
19  
20 substance use.

21  
22 The clinical interview is expected to take around 35 minutes to complete.  
23  
24  
25  
26  
27  
28

### 29 Self-report Assessments

30  
31 1. *Demographics and Mental Health History*: including details of work and education, physical  
32  
33 health (height, weight, and waist circumferences), history of mental health as well as family  
34  
35 history

36  
37 2. *International Physical Activity Questionnaire (IPAQ) - short version* [52, 53] a 7-item  
38  
39 questionnaire providing internationally comparable data on health-related physical activity.

40  
41 3. *Alcohol Use Disorders Identification Test – Consumption (AUDIT-C)* [54]: the questionnaire has  
42  
43 three short questions that estimate alcohol consumption in a standard, meaningful and non-  
44  
45 judgmental manner. Additional questions assessing age of onset of alcohol consumption will also  
46  
47 be used.

48  
49 4. *Suicidal Ideation Attributes Scale (SIDAS)* [55]: a five-item self-report questionnaire assessing the  
50  
51 frequency, controllability, closeness to attempt, distress, and interference with daily activities on  
52  
53 a 10-point Likert scale over the past month.  
54  
55  
56  
57  
58  
59  
60

- 1  
2  
3  
4  
5  
6  
7  
8  
9  
10  
11  
12  
13  
14  
15  
16  
17  
18  
19  
20  
21  
22  
23  
24  
25  
26  
27  
28  
29  
30  
31  
32  
33  
34  
35  
36  
37  
38  
39  
40  
41  
42  
43  
44  
45  
46  
47  
48  
49  
50  
51  
52  
53  
54  
55  
56  
57  
58  
59  
60
5. *Columbia-Suicide Severity Rating Scale (C-SSRS) [56]*: The scale comprises 3 sections: suicidal ideation, intensity of ideation, and suicidal behaviour. In this study, a self-rating adaptation of this questionnaire will be used in combination with the SIDAS.
6. *Brief Non-Suicidal Self-Injury Assessment Tool (B-NSSI-AT) [57]*: a measure of NSSI designed to assess primary (such as form, frequency, and function) and secondary (including but not limited to NSSI habituation; contexts in which NSSI is practiced; and NSSI perceived life interference, treatment, and impacts) NSSI characteristics.
7. *Quick Inventory of Depressive Symptomatology – self-report (QIDS-SR) [58]*: a self-rating (SR) version includes 16 questions with equivalent weightings (0-3) for each symptom item that assesses the nine criterion symptom domains designated by the DSM-IV to diagnose a major depressive episode.
8. *Overall Anxiety Severity Impairment Scale (OASIS) [59]*: a 5-item self-report measure that can be used to assess severity and impairment associated with any anxiety disorder or multiple anxiety disorders.
9. *Altman Self-Rating Mania Scale (ASRM) [60]*: a five-item self-rating scale, designed to assess the presence and/or severity of manic symptoms.
10. *Primary Care Post-Traumatic Stress Disorder Screen for DSM-5 (PC-PTSD-5) [61]*: a 5-item screen that was designed for use in primary care settings, designed to identify respondents with probable PTSD.
11. *Prodromal Questionnaire (PQ-16) [62]*: a self-report screen for use in secondary mental health care services to select subjects for psychosis risk.
12. *Eating Disorder Examination (EDE) [63, 64]*: comprises a range of health-related and demographic questions, including present height and weight, and a detailed and comprehensive assessment of symptoms, particularly binge eating. In this study, three eating disorder behaviours are assessed, namely binge eating, purging and strict dieting or fasting.
13. *Sleep questions*: 7 questions regarding time falling asleep, waking up during weekdays and weekends, hours of sleep, feelings when waking up. Sleep timing items are based on the



1  
2 Pittsburgh Sleep Quality Index (PSQI), and Munich Chrono Type Questionnaire (MCTQ), while  
3  
4 sleep quality items are based on expert consensus in the literature.

5  
6 14. *Work and Social Adjustment Scale (WSAS) [65]*: a five-item scale of functional impairment  
7  
8 attributable to an identified problem.

9  
10 15. *Schuster Social Support Scale (SSSS) [66]*: a 15-item measure of social support used to examine  
11  
12 an individual's social relationships with others (relatives, friends, spouse) and the associated  
13  
14 impact on their emotional functioning

15  
16 16. *Additional sleep questionnaires*: participants will complete the BMC sleep-wake self-report  
17  
18 questionnaire battery including questions regarding ethnicity, caffeine consumption, menstrual  
19  
20 cycle, visual impairments, and non-restorative sleep, as well as the *Pittsburgh Sleep Quality*  
21  
22 *Inventory (PSQI) [67]*, *Epworth Sleepiness Scale (ESS) [68]*, *Insomnia Severity Index (ISI) [69]*,  
23  
24 *Horne-Ostberg Morningness-Eveningness Questionnaire (MEQ) [70]*, and the *Seasonal Patterns*  
25  
26 *Assessment Questionnaire (SPAQ) [71]*.

27  
28  
29  
30  
31 The questionnaires are tailored (using skip logic) to the individual so the amount of time taken to  
32  
33 complete the questionnaire varies, but we estimate that on average the self-report assessment will take  
34  
35 around 45 minutes to complete.

### 36 37 38 39 40 **Sleep wake assessments**

41  
42 24-hour sleep-wake and circadian rest-activity parameters will be measured by actigraphy recordings  
43  
44 (ambulatory measurement of motor activity using a wrist-worn device). Actigraphy is a non-invasive tool  
45  
46 to objectively measure activity profiles used to estimate sleep and circadian patterns based on validated  
47  
48 algorithms. Participants will be asked to complete a sleep diary and to wear an actigraph (GENEActiv  
49  
50 device; Activinsights, Kimbolton, UK) on the non-dominant wrist for at least 10 days prior to  
51  
52 commencing the study, and continuously for the 8-week treatment phase. Two-week actigraphy  
53  
54 recordings will also be completed at the 12- and 16-week follow up assessments. The GENEActiv devices  
55  
56 have been validated against several types of accelerometry-based activity monitors [72-75] as well as for  
57  
58 sleep-wake scoring [76, 77]. For over three decades, actigraphy monitors like the GENEActiv devices  
59  
60

1  
2 have been considered as non-invasive instruments to measure sleep and activity patterns and have been  
3  
4 used extensively for research purposes in diverse clinical settings including sleep disorders, various  
5  
6 medical illnesses (e.g. cancer, HIV, traumatic brain injuries, neurodegenerative diseases) and mental  
7  
8 disorders (e.g. anxiety, depression, bipolar and psychotic disorders)[13, 78, 79].  
9

10 For details on the parameters measured, please refer to the actigraphy parameters under the 'Primary  
11  
12 sleep-wake and circadian variables of interest' in Table 1.  
13  
14  
15

### 16 17 **In-Lab Circadian Assessment**

18  
19 Biological circadian rhythms will be measured in an evening/overnight recording period, including  
20  
21 collection of salivary melatonin, salivary cortisol, and core body temperature to characterise 24-hour  
22  
23 rhythms. All circadian assessments will be performed in accordance with established Dim Light  
24  
25 Melatonin Onset (DLMO) protocols [80-83].  
26  
27

28 For details on the parameters measured, please refer to the in-lab circadian measures in the 'Primary  
29  
30 Outcome Measures column' in Table 1.  
31  
32  
33  
34

### 35 36 **Metabolic and inflammatory markers**

37  
38 The following markers will be collected at Baseline and 8-weeks follow up visits: (i) Triglycerides, (ii)  
39  
40 Cholesterol (including total, High Density Lipoprotein (HDL), and Low Density Lipoprotein (LDL)), (iii)  
41  
42 Fasting glucose, (iv) Fasting insulin, (v) Interleukin (IL)-1 $\beta$ , (vi) IL-6, (vii) Tissue Necrosis Factor (TNF)- $\alpha$ ,  
43  
44 (viii) C-Reactive Protein (CRP). Height, weight, and waist circumference will also be recorded.  
45  
46 Furthermore, insulin resistance will be estimated based on paired fasting plasma glucose and insulin  
47  
48 levels [84] by the updated homeostatic model assessment (HOMA2-IR) using iHOMA2 software V.8.8  
49  
50 [85].  
51  
52  
53  
54

### 55 56 **Genomics**

57  
58 Additional blood will be collected at baseline for the assessment of genomic risk markers as per  
59  
60 established procedures from the University of Queensland Human Studies Unit.

The schedule of trial assessments is summarized in Table 2.

**Table 2. Schedule of assessments**

| <i>Study week</i>                                                  | Enrolment Visit | Visit 1<br>(Baseline) | Visit 2<br>(Week 4) | Visit 3<br>(Week 8) | Visit 4<br>(Follow-up 1) | Visit 5<br>(Follow-up 2) |
|--------------------------------------------------------------------|-----------------|-----------------------|---------------------|---------------------|--------------------------|--------------------------|
|                                                                    |                 | <i>0</i>              | <i>4</i>            | <i>8</i>            | <i>12</i>                | <i>16</i>                |
| Informed Consent                                                   | ✓               |                       |                     |                     |                          |                          |
| Inclusion/Exclusion Criteria                                       | ✓               | ✓                     |                     |                     |                          |                          |
| Diagnostic Assessment<br>(SCID)                                    | ✓               |                       |                     |                     |                          |                          |
| Mental Risk Assessment<br>(CAARMS)                                 | ✓               | ✓                     | ✓                   | ✓                   | ✓                        | ✓                        |
| Demographics and Mental<br>Illness History                         |                 | ✓                     |                     |                     |                          |                          |
| Clinical Assessment (QIDS-<br>CR, MADRS, YMRS, BPRS,<br>SOFAS)     |                 | ✓                     | ✓                   | ✓                   | ✓                        | ✓                        |
| Self-report Assessment                                             |                 | ✓                     | ✓                   | ✓                   | ✓                        | ✓                        |
| Sleep-wake Assessment<br>(actigraphy monitoring)                   |                 | ✓                     | ✓                   | ✓                   | ✓                        | ✓                        |
| In-lab Circadian Assessment                                        |                 | ✓                     |                     | ✓                   |                          |                          |
| Blood Sample Collection<br>(Metabolic and<br>Inflammatory Markers) |                 | ✓                     |                     | ✓                   |                          |                          |
| Safety, side-effects, and<br>adherence assessment                  |                 |                       | ✓                   | ✓                   | ✓                        | ✓                        |
| IP dispensing                                                      |                 | ✓                     | ✓                   | ✓*                  | ✓*                       | ✓*                       |
| IP return                                                          |                 |                       | ✓                   | ✓                   |                          |                          |

\*if clinically indicated, at the discretion of the treating clinician

In addition to the visits listed above, safety, side-effects, and adherence assessment will be conducted weekly between weeks 0 and 8 via phone calls.

The Participant timeline is presented in Figure 1 – Study flow chart.

## Sample Size

Sample size was determined based on a previous study of circadian changes in response to Agomelatine [20] where a correlation coefficient of 0.54 was found for the key outcome of interest, namely correlation between change in DLMO and change in depressive symptoms. We conservatively estimated that the correlation coefficient for Brexpiprazole would be smaller, around 0.35 (i.e. a medium effect size), as the effects on the circadian system may be less direct. Assuming an alpha of 0.05 and 80% power for a one-tailed correlation analysis, a sample size of 49 would be required to detect this effect.

## Data Analysis/Statistical methods

Correlations will be performed between change scores (i.e., Visit 2 score minus Visit 1 score) for sleep and circadian measures, and change scores for depressive symptoms. The intention-to-treat principle will be used for missing data, with last observations carried forward. Prior to analysis, scatter plots and box plots with outlier and normality statistics will be generated for all variables to identify outliers and issues with variable distribution. Extreme outliers (beyond three z scores in either direction) will be checked against source data and testing notes to verify whether they are the result of an error in data entry or a specific issue during testing (e.g., equipment failure), and any errors rectified. If they are not the result of an error in data entry, outliers will be curtailed. Pearson's or Spearman's correlations will be selected to perform analyses based on normative or non-normative data distribution; a significance level will be set at  $\alpha=0.05$ . Correlations will be performed between other change scores to assess secondary and tertiary endpoints using the same methodology. Further tertiary endpoints will be assessed by partial correlations comparing categorical variables.

## Patient and public involvement

Clinical professionals working with young people with mental health issues were invited to comment on the study design and procedures. Research findings will be disseminated into the scientific, clinical and wider community.

## **Ethics and dissemination**

This trial has been approved by the Human Research Ethics Committee of the Sydney Local Health District (X19-0417 and 2019/ETH12986, Protocol Version v 1-3, dated 25.02.2021). The study will be conducted in compliance with all stipulations of the protocol, the conditions of ethics committee approval, the NHMRC National Statement on Ethical Conduct in Human Research and the Good Clinical Practice guidelines.

The results of this study will be disseminated as widely as possible into the scientific and broader community. This will include publication in peer-reviewed journals, scholarly book chapters, presentation at conferences and publication in conference proceedings. Publications arising from this project will be deposited into an open access institutional repository, where possible. Results will also be disseminated into the wider community in a format appropriate for a lay audience, through links including the BMC website and social media, as well as newsletters.

## **CONCLUSION**

This clinical trial investigates the effects of the adjunctive brexpiprazole treatment and the associated changes in sleep-wake cycle or circadian parameters in young people with depressive syndromes.

This protocol is one of a series of clinical trials that have been established to support a broader Youth Mental Health Clinical Trial Program at the BMC[86]. A series of clinical trials underpin the broader need to improve diagnosis and treatment outcomes for the youth mental health population. These trials aim to inform personalised treatment plans for specific clinical phenotypes, assisting to provide more effective and targeted interventions, thus necessitating the breadth of assessments used in this clinical trial, to reflect a wider range of questions than just the research questions asked in the current study.

Specifically, this trial will help to understand brexpiprazole's antidepressant mechanism of action in depressed youth with disturbed sleep patterns, and to determine the effectiveness of this treatment in this vulnerable population.

## Figure 1. Study flow chart

Legend: This figure illustrates the study design and participant timeline from referral to the last follow up visit, including withdrawal and safety procedures.

### TRIAL STATUS

Protocol ID: BMC-YMH-005-2018, Version: v 1-3, dated 25/02/2021.

The trial has not commenced recruitment.

### LIST OF ABBREVIATIONS

| ABBREVIATION | TERM                                                                |
|--------------|---------------------------------------------------------------------|
| AE           | Adverse Event                                                       |
| AIMS         | Abnormal Involuntary Movement Scale                                 |
| ANZCTR       | Australian New Zealand Clinical Trials Registry                     |
| ASRM         | Altman Self-Rating Mania scale                                      |
| AUDIT-C      | Alcohol Use Disorders Identification Test- Consumption              |
| BMC          | Brain and Mind Centre                                               |
| BMI          | Body Mass Index                                                     |
| B-NSSI-AT    | Brief Non-Suicidal Self-Injury Assessment Tool                      |
| BPRS         | Brief Psychiatric Rating Scale                                      |
| CAARMS       | Comprehensive Assessment of At-Risk Mental States                   |
| CGI          | Clinical Global Impressions scale                                   |
| CRP          | C-Reactive Protein                                                  |
| C-SSRS       | Columbia- Suicide Severity Rating Scale                             |
| DLMO         | Dim Light Melatonin Onset                                           |
| DSM-5        | Diagnostic and Statistical Manual for Mental Disorders, 5th Edition |
| EDE          | Eating Disorder Examination                                         |
| EPS          | Extrapyramidal Symptoms                                             |
| ESS          | Epworth Sleepiness Scale                                            |
| HDL          | High Density Lipoprotein                                            |
| HOMA2-IR     | Homeostasis Model of Insulin Resistance                             |
| HREC         | Human Research Ethics Committee                                     |
| IL           | Interleukin                                                         |
| IP           | Investigational Product                                             |
| IPAQ         | International Physical Activity Questionnaire                       |
| ISI          | Insomnia Severity Index                                             |
| LDL          | Low Density Lipoprotein                                             |
| MADRS        | Montgomery-Åsberg Depression Rating Scale                           |
| MCTQ         | Munich Chronotype Questionnaire                                     |
| MDD          | Major Depressive Disorder                                           |
| MEQ          | Morningness-Eveningness Questionnaire                               |
| NEET         | Not in Education, Employment or Training                            |
| OASIS        | Overall Anxiety Severity Impairment Scale                           |

|            |                                                                                      |
|------------|--------------------------------------------------------------------------------------|
| PC-PTSD-5  | Primary Care Post-Traumatic Stress Disorder screen                                   |
| PIS        | Participant Information Statement                                                    |
| PQ-16      | Prodromal Questionnaire (brief version)                                              |
| PSQI       | Pittsburgh Sleep Quality Index                                                       |
| QIDS-CR    | Quick Inventory of Depressive Symptomatology (clinician-rated)                       |
| QIDS-SR    | Quick Inventory of Depressive Symptomatology (self-report)                           |
| SAS        | Simpson-Angus Scale                                                                  |
| SCID       | Structured Clinical Interview for DSM 5                                              |
| SIDAS      | Suicidal Ideation Attributes Scale                                                   |
| SNRI       | Selective Serotonin and Norepinephrine Reuptake Inhibitor                            |
| SOFAS      | Social and Occupational Functioning Assessment Scale                                 |
| SPAQ       | Seasonal Patterns Assessment Questionnaire                                           |
| SSRI       | Selective Serotonin Reuptake Inhibitor                                               |
| SSSS       | Schuster Social Support Scale                                                        |
| TAU        | Treatment As Usual                                                                   |
| TNF        | Tissue Necrosis Factor                                                               |
| WHO-ASSIST | World Health Organisation Alcohol, Smoking, and Substance Involvement Screening Test |
| WSAS       | Work and Social Adjustment Scale                                                     |
| YMRS       | Young Mania Rating Scale                                                             |

## AUTHOR CONTRIBUTIONS

JSC and IBH conceived the study, led the proposal and protocol development. JSC wrote the trial protocol.

AG drafted the first version of the manuscript. NZ drafted the final version of the manuscript with input from other authors. JSC, AG, AN, NZ, YJSS, CW, CR, JJC, CMM, FML, DK and EMS were all involved with modifications to the design of the study and with drafting of this paper. All authors have read and approved the final manuscript.

## FUNDING

This investigator-initiated trial with Lundbeck compound is supported by Lundbeck Australia Pty Ltd. (award/grant number is not applicable).

## COMPETING INTERESTS

Professor Ian Hickie is the Co-Director, Health and Policy at the Brain and Mind Centre (BMC) University of Sydney, Australia. The BMC operates an early-intervention youth services at Camperdown under contract to headspace. Professor Hickie has previously led community-based and pharmaceutical industry-

1 supported (Wyeth, Eli Lilly, Servier, Pfizer, AstraZeneca) projects focused on the identification and better  
2 management of anxiety and depression. He is the Chief Scientific Advisor to, and a 5% equity shareholder  
3  
4 in, InnoWell Pty Ltd. InnoWell was formed by the University of Sydney (45% equity) and PwC (Australia;  
5  
6 45% equity) to deliver the \$30 M Australian Government-funded Project Synergy (2017-20) and to lead  
7  
8 transformation of mental health services internationally through the use of innovative technologies.  
9  
10

11 Associate Professor Elizabeth M Scott is the Medical Director, Young Adult Mental Health Unit, St  
12  
13 Vincent's Hospital Darlinghurst, Discipline Leader of Adult Mental Health, School of Medicine, University  
14  
15 of Notre Dame, Research Affiliate, The University of Sydney and Consultant Psychiatrist. She has  
16  
17 received honoraria for educational seminars related to the clinical management of depressive disorders  
18  
19 supported by Servier and Eli-Lilly pharmaceuticals. She has participated in a national advisory board for  
20  
21 the antidepressant compound Pristiq, manufactured by Pfizer. She was the National Coordinator of an  
22  
23 antidepressant trial sponsored by Servier.  
24  
25  
26  
27  
28  
29

30 Other authors declare no competing interests.  
31  
32  
33  
34  
35

## 36 REFERENCES

- 37 1. Kessler, R.C., et al., *The global burden of mental disorders: An update from the WHO*  
38 *World Mental Health (WMH) Surveys*. Epidemiologia e Psichiatria Sociale, 2011. **18**(01): p.  
39 23-33.
- 40 2. Gore, F.M., et al., *Global burden of disease in young people aged 10–24 years: A*  
41 *systematic analysis*. The Lancet, 2011. **377**(9783): p. 2093-2102.
- 42 3. Kennard, B.D., et al., *Remission and recovery in the Treatment for Adolescents with*  
43 *Depression Study (TADS): acute and long-term outcomes*. Journal of the American  
44 Academy of Child & Adolescent Psychiatry, 2009. **48**(2): p. 186-195.
- 45 4. March, J., et al., *Fluoxetine, cognitive-behavioral therapy, and their combination for*  
46 *adolescents with depression: Treatment for Adolescents With Depression Study (TADS)*  
47 *randomized controlled trial*. Jama, 2004. **292**(7): p. 807-820.
- 48 5. Rush, A.J., et al., *Acute and Longer-Term Outcomes in Depressed Outpatients Requiring*  
49 *One or Several Treatment Steps: A STAR\*D Report*. American Journal of Psychiatry, 2006.  
50 **163**: p. 1905-1917.
- 51 6. Zhou, X., et al., *Comparative efficacy, acceptability, and tolerability of augmentation agents*  
52 *in treatment-resistant depression: systematic review and network meta-analysis*. J Clin  
53 Psychiatry, 2015. **76**(4): p. e487-98.
- 54 7. Benca, R.M., et al., *Sleep and psychiatric disorders: A meta-analysis*. Archives of General  
55 Psychiatry, 1992. **49**(8): p. 651-668.
- 56 8. van Mill, J.G., et al., *Insomnia and sleep duration in a large cohort of patients with major*  
57 *depressive disorder and anxiety disorders*. Journal of Clinical Psychiatry, 2010. **71**(3): p.  
58 239-246.  
59  
60



- 1
  - 2
  - 3
  - 4
  - 5
  - 6
  - 7
  - 8
  - 9
  - 10
  - 11
  - 12
  - 13
  - 14
  - 15
  - 16
  - 17
  - 18
  - 19
  - 20
  - 21
  - 22
  - 23
  - 24
  - 25
  - 26
  - 27
  - 28
  - 29
  - 30
  - 31
  - 32
  - 33
  - 34
  - 35
  - 36
  - 37
  - 38
  - 39
  - 40
  - 41
  - 42
  - 43
  - 44
  - 45
  - 46
  - 47
  - 48
  - 49
  - 50
  - 51
  - 52
  - 53
  - 54
  - 55
  - 56
  - 57
  - 58
  - 59
  - 60
9. Baglioni, C., et al., *Insomnia as a predictor of depression: A meta-analytic evaluation of longitudinal epidemiological studies*. Journal of Affective Disorders, 2011. **135**(1-3): p. 10-19.
10. Liu, X., et al., *Insomnia and hypersomnia associated with depressive phenomenology and comorbidity in childhood depression*. Sleep, 2007. **30**(1): p. 83-90.
11. Geoffroy, P.A., et al., *Insomnia and hypersomnia in major depressive episode: prevalence, sociodemographic characteristics and psychiatric comorbidity in a population-based study*. Journal of Affective Disorders, 2018. **226**: p. 132-141.
12. Merikangas, K.R., et al., *Real-time mobile monitoring of the dynamic associations among motor activity, energy, mood, and sleep in adults with bipolar disorder*. JAMA psychiatry, 2019. **76**(2): p. 190-198.
13. Difrancesco, S., et al., *Sleep, circadian rhythm, and physical activity patterns in depressive and anxiety disorders: A 2-week ambulatory assessment study*. Depression and anxiety, 2019. **36**(10): p. 975-986.
14. Germain, A. and D.J. Kupfer, *Circadian rhythm disturbances in depression*. Human Psychopharmacology, 2008. **23**(7): p. 571-585.
15. Lanfumey, L., R. Mongeau, and M. Hamon, *Biological rhythms and melatonin in mood disorders and their treatments*. Pharmacology and Therapeutics, 2013. **138**(2): p. 176-184.
16. Krystal, A.D., et al., *Chronobiologic parameter changes in patients with major depressive disorder and sleep disturbance treated with adjunctive brexpiprazole: an open-label, flexible-dose, exploratory substudy*. Journal of Affective Disorders, 2020.
17. Carpenter, J.S., R. Robillard, and I.B. Hickie, *Variations in the sleep-wake cycle from childhood to adulthood: Chronobiological perspectives*. ChronoPhysiology and Therapy, 2015. **5**: p. 37-49.
18. Robillard, R., et al., *Delayed sleep phase in young people with unipolar or bipolar affective disorders*. Journal of Affective Disorders, 2013. **145**(2): p. 260-263.
19. Robillard, R., et al., *Circadian rhythms and psychiatric profiles in young adults with unipolar depressive disorders*. Transl Psychiatry, 2018. **8**: p. 213.
20. Robillard, R., et al., *Parallel Changes in Mood and Melatonin Rhythm Following an Adjunctive Multimodal Chronobiological Intervention With Agomelatine in People With Depression: A Proof of Concept Open Label Study*. Front Psychiatry, 2018. **9**: p. 624.
21. Benedetti, F., et al., *Phase advance is an actimetric correlate of antidepressant response to sleep deprivation and light therapy in bipolar depression*. Chronobiology International, 2007. **24**(5): p. 921-937.
22. Hobart, M., et al., *A Randomized, Placebo-Controlled Study of the Efficacy and Safety of Fixed-Dose Brexpiprazole 2 mg/d as Adjunctive Treatment of Adults With Major Depressive Disorder*. J Clin Psychiatry, 2018. **79**(4).
23. Bauer, M., et al., *A randomised, placebo-controlled 24-week study evaluating adjunctive brexpiprazole in patients with major depressive disorder*. Acta Neuropsychiatr, 2018: p. 1-9.
24. Thase, M.E., et al., *Adjunctive brexpiprazole 1 and 3 mg for patients with major depressive disorder following inadequate response to antidepressants: a phase 3, randomized, double-blind study*. J Clin Psychiatry, 2015. **76**(9): p. 1232-40.
25. Thase, M.E., et al., *Efficacy and safety of adjunctive brexpiprazole 2 mg in major depressive disorder: a phase 3, randomized, placebo-controlled study in patients with inadequate response to antidepressants*. J Clin Psychiatry, 2015. **76**(9): p. 1224-31.
26. Yoon, S., et al., *Adjunctive Brexpiprazole as a Novel Effective Strategy for Treating Major Depressive Disorder: A Systematic Review and Meta-Analysis*. Journal of Clinical Psychopharmacology, 2017. **37**: p. 46-53.
27. Citrome, L., T.B. Stensbol, and K. Maeda, *The preclinical profile of brexpiprazole: what is its clinical relevance for the treatment of psychiatric disorders?* Expert Rev Neurother, 2015. **15**(10): p. 1219-29.
28. Beyer, J.L. and R.H. Weisler, *Adjunctive brexpiprazole for the treatment of major depressive disorder*. Expert Opin Pharmacother, 2016. **17**(17): p. 2331-2339.
29. Krystal, A.D., et al., *Effects of Adjunctive Brexpiprazole on Sleep Disturbances in Patients With Major Depressive Disorder: An Open-Label, Flexible-Dose, Exploratory Study*. Prim Care Companion CNS Disord, 2016. **18**(5).

- 1
  - 2
  - 3
  - 4
  - 5
  - 6
  - 7
  - 8
  - 9
  - 10
  - 11
  - 12
  - 13
  - 14
  - 15
  - 16
  - 17
  - 18
  - 19
  - 20
  - 21
  - 22
  - 23
  - 24
  - 25
  - 26
  - 27
  - 28
  - 29
  - 30
  - 31
  - 32
  - 33
  - 34
  - 35
  - 36
  - 37
  - 38
  - 39
  - 40
  - 41
  - 42
  - 43
  - 44
  - 45
  - 46
  - 47
  - 48
  - 49
  - 50
  - 51
  - 52
  - 53
  - 54
  - 55
  - 56
  - 57
  - 58
  - 59
  - 60
30. Hickie, I.B., et al., *Right care, first time: a highly personalised and measurement-based care model to manage youth mental health*. Medical Journal of Australia, 2019. **211**(S9): p. S3-S46.
31. American Psychiatric Association, *Diagnostic and statistical manual of mental disorders*. 5th ed. 2013, Arlington, VA: American Psychiatric Pub.
32. Rush, A.J., et al., *The 16-Item quick inventory of depressive symptomatology (QIDS), clinician rating (QIDS-C), and self-report (QIDS-SR): a psychometric evaluation in patients with chronic major depression*. Biological Psychiatry, 2003. **54**(5): p. 573-583.
33. Yung, A.R., et al., *Mapping the onset of psychosis: the Comprehensive Assessment of At-Risk Mental States*. Australian and New Zealand Journal of Psychiatry, 2005. **39**: p. 964-971.
34. WHO ASSIST Working Group, *The Alcohol, Smoking and Substance Involvement Screening Test (ASSIST): development, reliability and feasibility*. Addiction, 2002. **97**(9): p. 1183-94.
35. Humeniuk, R., et al., *Validation of the Alcohol, Smoking And Substance Involvement Screening Test (ASSIST)*. Addiction, 2008. **103**(6): p. 1039-47.
36. Lingjaerde, O., et al., *The UKU side effect rating scale: a new comprehensive rating scale for psychotropic drugs and a cross-sectional study of side effects in neuroleptic-treated patients*. Acta Psychiatrica Scandinavica, 1987. **76**.
37. Guy, W.A., *Abnormal Involuntary Movement Scale (AIMS)*, in *ECDEU Assessment Manual for Psychopharmacology*. 1976, U.S. Department of Health Education and Welfare: Washington, DC p. 534-537.
38. Simpson, G.M. and J.W.S. Angus, *A rating scale for extrapyramidal side effects*. Acta Psychiatrica Scandinavica, 1970. **45**: p. 11-19.
39. Hickie, I.B., et al., *Applying clinical staging to young people who present for mental health care*. Early Intervention in Psychiatry, 2013. **7**(1): p. 31-43.
40. McGorry, P.D., et al., *Clinical staging of psychiatric disorders: a heuristic framework for choosing earlier, safer and more effective interventions*. Aust N Z J Psychiatry, 2006. **40**(8): p. 616-22.
41. Scott, J., et al., *Clinical staging in psychiatry: a cross-cutting model of diagnosis with heuristic and practical value*. British Journal of Psychiatry, 2013. **202**(4): p. 243-245.
42. Hickie, I.B., J. Scott, and P.D. McGorry, *Clinical staging for mental disorders: a new development in diagnostic practice in mental health*. Med J Aust, 2013. **198**(9): p. 461-2.
43. Hickie, I.B., et al., *Evaluating differential developmental trajectories to adolescent-onset mood and psychotic disorders*. BMC Psychiatry, 2013. **13**: p. 303.
44. Crouse, J.J., et al., *Transdiagnostic neurocognitive subgroups and functional course in young people with emerging mental disorders: a cohort study*. BJPsych Open, 2020. **6**(2).
45. Carpenter, J.S., et al., *Cohort profile: the Brain and Mind Centre Optymise cohort: tracking multidimensional outcomes in young people presenting for mental healthcare*. BMJ open, 2020. **10**(3): p. e030985.
46. Scott, E.M., et al., *Early intervention, prevention, and prediction in mood disorders: Tracking multidimensional outcomes in young people presenting for mental health care*, in *Personalized Psychiatry*. 2020, Elsevier. p. 39-62.
47. Montgomery, S.A. and S.A. Asberg, *A new depression scale designed to be sensitive to change*. British Journal of Psychiatry, 1979. **134**: p. 382-389.
48. Young, R., et al., *A rating scale for mania: reliability, validity and sensitivity*. The British Journal of Psychiatry, 1978. **133**(5).
49. Overall, J.E. and D.R. Gorham, *The brief psychiatric rating scale*. Psychological Reports, 1962. **10**: p. 799-812.
50. Goldman, H.H., A.E. Skodol, and T.R. Lave, *Revising axis V for DSM-IV: A review of measures of social functioning*. American Journal of Psychiatry, 1992. **149**(9): p. 1148-1156.
51. Busner, J. and S.D. Targum, *The clinical global impressions scale: applying a research tool in clinical practice*. Psychiatry (Edgemont), 2007. **4**(7): p. 28.
52. Craig, C.L., et al., *International physical activity questionnaire: 12-country reliability and validity*. Med Sci Sports Exerc, 2003. **35**(8): p. 1381-95.

- 1  
2 53. Booth, M., *Assessment of physical activity: an international perspective*. Res Q Exerc Sport, 2000. **71**(2 Suppl): p. S114-20.
- 3  
4 54. Bush, K., et al., *The AUDIT alcohol consumption questions (AUDIT-C): an effective brief screening test for problem drinking. Ambulatory Care Quality Improvement Project (ACQUIP). Alcohol Use Disorders Identification Test*. Arch Intern Med, 1998. **158**(16): p. 1789-95.
- 5  
6  
7  
8 55. van Spijker, B.A., et al., *The suicidal ideation attributes scale (SIDAS): Community-based validation study of a new scale for the measurement of suicidal ideation*. Suicide Life Threat Behav, 2014. **44**(4): p. 408-19.
- 9  
10  
11 56. Posner, K., et al., *The Columbia-Suicide Severity Rating Scale: initial validity and internal consistency findings from three multisite studies with adolescents and adults*. Am J Psychiatry, 2011. **168**(12): p. 1266-77.
- 12  
13  
14 57. Whitlock, J., D. Exner-Cortens, and A. Purington, *Assessment of nonsuicidal self-injury: development and initial validation of the Non-Suicidal Self-Injury-Assessment Tool (NSSI-AT)*. Psychol Assess, 2014. **26**(3): p. 935-46.
- 15  
16  
17 58. Rush, A.J., et al., *The 16-Item Quick Inventory of Depressive Symptomatology (QIDS), clinician rating (QIDS-C), and self-report (QIDS-SR): a psychometric evaluation in patients with chronic major depression*. Biol Psychiatry, 2003. **54**(5): p. 573-83.
- 18  
19  
20 59. Norman, S.B., et al., *Development and validation of an Overall Anxiety Severity And Impairment Scale (OASIS)*. Depress Anxiety, 2006. **23**(4): p. 245-9.
- 21  
22  
23 60. Campbell-Sills, L., et al., *Validation of a brief measure of anxiety-related severity and impairment: the Overall Anxiety Severity and Impairment Scale (OASIS)*. J Affect Disord, 2009. **112**(1-3): p. 92-101.
- 24  
25  
26 61. Prins, A., et al., *The Primary Care PTSD Screen for DSM-5 (PC-PTSD-5): Development and Evaluation Within a Veteran Primary Care Sample*. J Gen Intern Med, 2016. **31**(10): p. 1206-11.
- 27  
28  
29 62. Ising, H.K., et al., *The validity of the 16-item version of the Prodromal Questionnaire (PQ-16) to screen for ultra high risk of developing psychosis in the general help-seeking population*. Schizophr Bull, 2012. **38**(6): p. 1288-96.
- 30  
31  
32 63. Hay, P.J., et al., *Eating disorder behaviors are increasing: findings from two sequential community surveys in South Australia*. PLoS One, 2008. **3**(2): p. e1541.
- 33  
34  
35 64. Mitchison, D., et al., *The changing demographic profile of eating disorder behaviors in the community*. BMC Public Health, 2014. **14**: p. 943.
- 36  
37  
38 65. Mundt, J.C., et al., *The Work and Social Adjustment Scale: a simple measure of impairment in functioning*. Br J Psychiatry, 2002. **180**: p. 461-4.
- 39  
40  
41 66. Schuster, T.L., R.C. Kessler, and R.H. Aseltine, Jr., *Supportive interactions, negative interactions, and depressed mood*. Am J Community Psychol, 1990. **18**(3): p. 423-38.
- 42  
43  
44 67. Buysse, D.J., et al., *The Pittsburgh Sleep Quality Index: A new instrument for psychiatric practice and research* Psychiatry Research, 1988. **28**: p. 193-213.
- 45  
46  
47 68. Johns, M.W., *A new method for measuring daytime sleepiness: The Epworth sleepiness scale*. Sleep, 1991. **14**(6): p. 540-545.
- 48  
49  
50 69. Bastien, C.H., A. Vallieres, and C.M. Morin, *Validation of the Insomnia Severity Index as an outcome measure for insomnia research*. Sleep Medicine, 2001. **2**: p. 297-307.
- 51  
52  
53 70. Horne, J.A. and O. Ostberg, *A self-assessment questionnaire to determine morningness-eveningness in human circadian rhythms*. International Journal of Chronobiology, 1975. **4**(2): p. 97-110.
- 54  
55  
56 71. Rosenthal, N.E., et al., *Seasonal affective disorder and its relevance for the understanding and treatment of bulimia.*, in *The Psychobiology of Bulimia.*, J.I. Hudson and H.G. Pope, Editors. 1987, American Psychiatric Press: Washington, DC. p. 205-228.
- 57  
58  
59 72. Schaefer, C.A., et al., *Establishing and evaluating wrist cutpoints for the GENEActiv accelerometer in youth*. Med Sci Sports Exerc, 2014. **46**(4): p. 826-33.
- 60  
73. Hildebrand, M., et al., *Age group comparability of raw accelerometer output from wrist- and hip-worn monitors*. Med Sci Sports Exerc, 2014. **46**(9): p. 1816-24.
74. Esliger, D.W., et al., *Validation of the GENEActiv Accelerometer*. Med Sci Sports Exerc, 2011. **43**(6): p. 1085-93.



- 1  
2 75. van Hees, V.T., et al., *Separating movement and gravity components in an acceleration*  
3 *signal and implications for the assessment of human daily physical activity*. PLoS One,  
4 2013. **8**(4): p. e61691.
- 5 76. te Lindert, B.H. and E.J. Van Someren, *Sleep estimates using microelectromechanical*  
6 *systems (MEMS)*. Sleep, 2013. **36**(5): p. 781-789.
- 7 77. van Hees, V.T., et al., *A Novel, Open Access Method to Assess Sleep Duration Using a*  
8 *Wrist-Worn Accelerometer*. PLoS One, 2015. **10**(11): p. e0142533.
- 9 78. Stone, J.E., et al., *Accuracy of the GENEActiv Device for Measuring Light Exposure in*  
10 *Sleep and Circadian Research*. Clocks & Sleep, 2020. **2**(2): p. 143-152.
- 11 79. Pavey, T.G., et al., *The validity of the GENEActiv wrist-worn accelerometer for measuring*  
12 *adult sedentary time in free living*. Journal of science and medicine in sport, 2016. **19**(5): p.  
13 395-399.
- 14 80. Lewy, A.J. and R.L. Sack, *The dim light melatonin onset as a marker for circadian phase*  
15 *position*. Chronobiology International, 1989. **6**(1): p. 93-102.
- 16 81. de Almeida, E.A., et al., *Measurement of melatonin in body fluids: standards, protocols and*  
17 *procedures*. Childs Nerv Syst, 2011. **27**(6): p. 879-91.
- 18 82. Voultsios, A., D.J. Kennaway, and D. Dawson, *Salivary melatonin as a circadian phase*  
19 *marker: Validation and comparison to plasma melatonin*. Journal of Biological Rhythms,  
20 1997. **12**(5): p. 457-466.
- 21 83. Pandi-Perumal, S.R., et al., *Dim Light Melatonin Onset (DLMO): A tool for the analysis of*  
22 *circadian phase in human sleep and chronobiological disorders*. Progress in Neuro-  
23 *Psychopharmacology and Biological Psychiatry*, 2007. **31**(1): p. 1-11.
- 24 84. Wallace, T.M., J.C. Levy, and D.R. Matthews, *Use and Abuse of HOMA Modeling*. Diabetes  
25 *Care*, 2004. **27**(6): p. 1487-1495.
- 26 85. Hill, N., J. Levy, and D. Matthews, *Expansion of the Homeostasis Model Assessment of<sup>2</sup>-*  
27 *Cell Function and Insulin Resistance to Enable Clinical Trial Outcome Modeling Through*  
28 *the Interactive Adjustment of Physiology and Treatment Effects: iHOMA2*. Diabetes Care,  
29 2013. **36**: p. 2324 - 2330.
- 30 86. Rohleder, C., et al., *Protocol: Youth Mental Health Tracker: protocol to establish a*  
31 *longitudinal cohort and research database for young people attending Australian mental*  
32 *health services*. BMJ Open, 2020. **10**(6).
- 33  
34  
35  
36  
37  
38  
39  
40  
41  
42  
43  
44  
45  
46  
47  
48  
49  
50  
51  
52  
53  
54  
55  
56  
57  
58  
59  
60

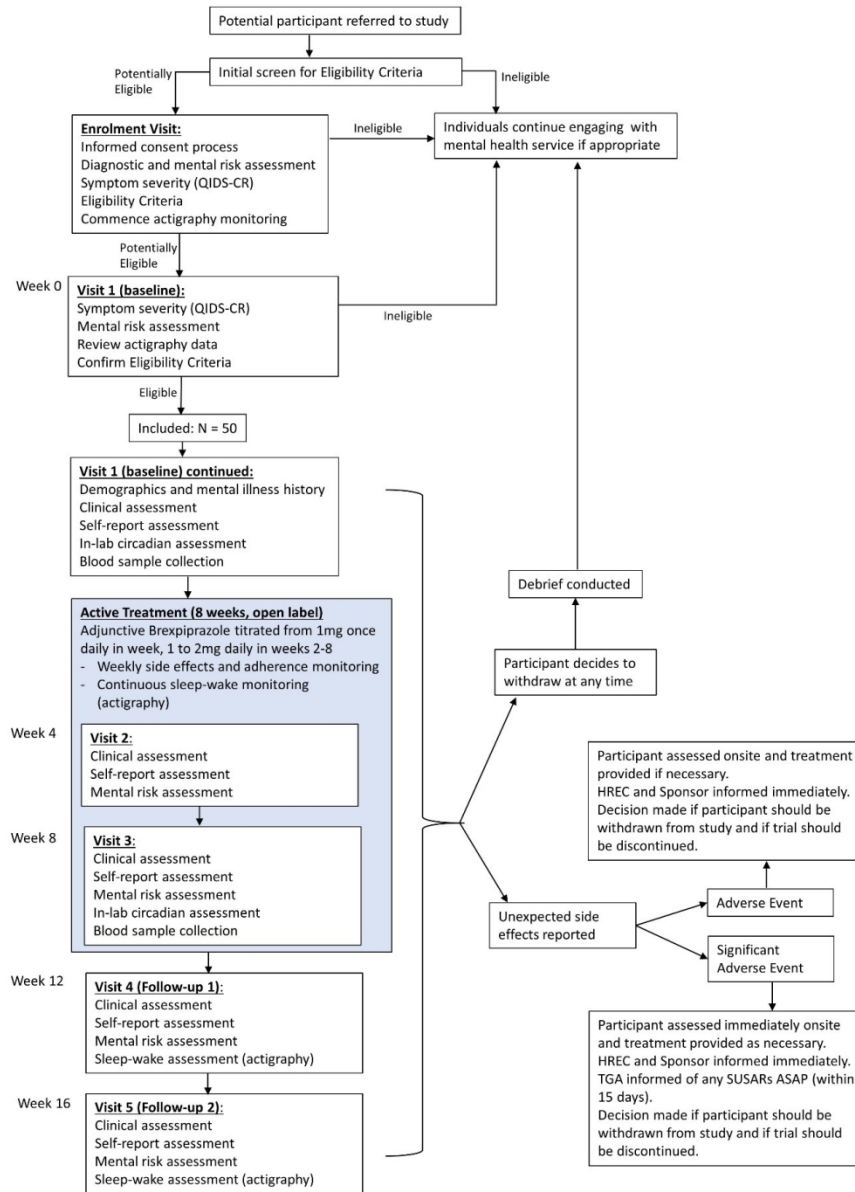

This figure illustrates the study design and participant timeline from referral to the last follow up visit, including withdrawal and safety procedures.

155x209mm (220 x 220 DPI)

# BMJ Open

## Effects of adjunctive brexpiprazole on sleep-wake and circadian parameters in youth with depressive syndromes: Study protocol for a clinical trial

|                                 |                                                                                                                                                                                                                                                                                                                                                                                                                                                                                                                                                                                                                                                                                                                                                                                                                                                                                                                                            |
|---------------------------------|--------------------------------------------------------------------------------------------------------------------------------------------------------------------------------------------------------------------------------------------------------------------------------------------------------------------------------------------------------------------------------------------------------------------------------------------------------------------------------------------------------------------------------------------------------------------------------------------------------------------------------------------------------------------------------------------------------------------------------------------------------------------------------------------------------------------------------------------------------------------------------------------------------------------------------------------|
| Journal:                        | <i>BMJ Open</i>                                                                                                                                                                                                                                                                                                                                                                                                                                                                                                                                                                                                                                                                                                                                                                                                                                                                                                                            |
| Manuscript ID                   | bmjopen-2021-056298.R1                                                                                                                                                                                                                                                                                                                                                                                                                                                                                                                                                                                                                                                                                                                                                                                                                                                                                                                     |
| Article Type:                   | Protocol                                                                                                                                                                                                                                                                                                                                                                                                                                                                                                                                                                                                                                                                                                                                                                                                                                                                                                                                   |
| Date Submitted by the Author:   | 03-Mar-2022                                                                                                                                                                                                                                                                                                                                                                                                                                                                                                                                                                                                                                                                                                                                                                                                                                                                                                                                |
| Complete List of Authors:       | Carpenter, Joanne; University of Sydney Brain and Mind Research Institute, ; Zmicerevska, Natalia; The University of Sydney, Brain and Mind Centre Crouse, Jacob; The University of Sydney, Brain and Mind Centre Nichles, Alissa; The University of Sydney, Brain and Mind Centre Garland, Alexandra; The University of Sydney, Brain and Mind Centre Song, Yun; The University of Sydney, Brain and Mind Centre Wilson, Chloe; The University of Sydney Brain and Mind Centre Rohleder, Cathrin; The University of Sydney, Brain and Mind Centre McHugh, Catherine; The University of Sydney Leweke, F. Markus; The University of Sydney, Brain and Mind Centre Koethe, Dagmar; The University of Sydney, Brain and Mind Centre Scott, Elizabeth; The University of Sydney, Brain and Mind Centre; The University of Notre Dame Australia School of Medicine Sydney Campus Hickie, Ian; The University of Sydney, Brain and Mind Centre; |
| <b>Primary Subject Heading</b>: | Mental health                                                                                                                                                                                                                                                                                                                                                                                                                                                                                                                                                                                                                                                                                                                                                                                                                                                                                                                              |
| Secondary Subject Heading:      | Research methods, Mental health, Medical publishing and peer review                                                                                                                                                                                                                                                                                                                                                                                                                                                                                                                                                                                                                                                                                                                                                                                                                                                                        |
| Keywords:                       | MENTAL HEALTH, PSYCHIATRY, Depression & mood disorders < PSYCHIATRY                                                                                                                                                                                                                                                                                                                                                                                                                                                                                                                                                                                                                                                                                                                                                                                                                                                                        |
|                                 |                                                                                                                                                                                                                                                                                                                                                                                                                                                                                                                                                                                                                                                                                                                                                                                                                                                                                                                                            |

SCHOLARONE™  
Manuscripts

1  
2 1 **Effects of adjunctive brexpiprazole on sleep-wake and circadian parameters in youth with depressive**  
3  
4 2 **syndromes: Study protocol for a clinical trial**

5 3  
6 4  
7 4  
8 5 Joanne S Carpenter<sup>1</sup>, Natalia Zmicerevska<sup>1</sup>, Jacob J Crouse<sup>1</sup>, Alexandra Garland<sup>1</sup>, Alissa Nichles<sup>1</sup>, Yun Ju  
9 6 Christine Song<sup>1</sup>, Chloe Wilson<sup>1</sup>, Cathrin Rohleder<sup>1</sup>, Catherine M McHugh<sup>1</sup>, F Markus Leweke<sup>1</sup>, Dagmar  
10 7 Koethe<sup>1</sup>, Elizabeth M Scott<sup>2</sup>, Ian B Hickie<sup>1</sup>  
11  
12 8  
13 9  
14 10

15 10 <sup>1</sup>Youth Mental Health and Technology Team, Brain and Mind Centre, University of Sydney, Sydney, NSW,  
16 11 Australia.  
17 12

18 12 <sup>2</sup>Notre Dame Medical School, Sydney, NSW, Australia  
19 13  
20 14  
21 15

22 15 **Corresponding author:**

23 16 Natalia Zmicerevska

24 17 Brain and Mind Centre, The University of Sydney

25 18 94 Mallet St, Camperdown, Sydney, NSW Australia, 2050

26 19 [natalia.zmicerevska@sydney.edu.au](mailto:natalia.zmicerevska@sydney.edu.au)  
27 20  
28 21  
29 22  
30 23  
31 24  
32 25  
33 26  
34 27  
35 28  
36 29  
37 30  
38 31  
39 32  
40 33  
41 34  
42 35  
43 36  
44 37  
45 38  
46 39  
47 40  
48 41  
49 42  
50 43  
51 44  
52 45  
53 46  
54 47  
55 48  
56 49  
57 50  
58 51  
59 52  
60 53

Word Count (max 4,000): 4,144 (without Abstract, Article Summary, Table 1 and Table 2)

## ABSTRACT

### Introduction

Sleep-wake and circadian disturbance is a key feature of mood disorders with a potential causal role and particular relevance to young people. Brexpiprazole is a second generation antipsychotic medication with demonstrated efficacy as an adjunct to antidepressant treatment for Major Depressive Disorder (MDD) in adults, with preliminary evidence suggesting greater effectiveness in subgroups of depressed patients with sleep disturbances. This clinical trial aims to evaluate the relationships between changes in sleep-wake and circadian parameters and changes in depressive symptoms following adjunctive brexpiprazole treatment in young adults with MDD and sleep-wake disturbance.

### Methods and analysis

This study is designed as a 16 week (8 weeks active treatment, 8 weeks follow up) mechanistic, open-label, single-arm phase IV clinical trial and aims to recruit 50 young people aged 18 to 30 with MDD and sleep-wake cycle disturbance through an early intervention youth mental health clinic in Sydney, Australia. At baseline, participants will undergo multidimensional outcome assessment and subsequently receive 8 weeks of open-label treatment with brexpiprazole as adjunctive to their stable psychotropic medication. Following 4 weeks of treatment, clinical and self-report measures will be repeated. Ambulatory sleep-wake monitoring will be conducted continuously for the duration of treatment. After 8 weeks of treatment, all multidimensional outcome assessments will be repeated. Follow-up visits will be conducted 4 and 8 weeks after trial completion (including sleep-wake, clinical, and self-report assessments). Circadian rhythm biomarkers including salivary melatonin, cortisol, and core body temperature will be collected during an in-lab assessment. Additionally, metabolic, inflammatory, and genetic risk markers will be collected at baseline and after 8 weeks of treatment.

### Ethics and dissemination

This trial protocol has been approved by the Human Research Ethics Committee of the Sydney Local Health District (X19-0417 and 2019/ETH12986, Protocol Version v 1-3, dated 25.02.2021). The results of this study,



1  
2 62 in de-identified form, will be disseminated through publication in peer-reviewed journals, scholarly book  
3  
4 63 chapters, presentation at conferences and publication in conference proceedings.  
5

6 64  
7

## 8 65 **Trial Registration**

10 66 Australian New Zealand Clinical Trials Registry (ANZCTR) Number: ACTRN12619001456145p, Date 22  
12  
13 67 October, 2019.  
14

15 68  
16

## 17 69 **KEYWORDS:**

20 70 Mental health, adjunctive brexpiprazole, sleep-wake cycle, youth depression.  
21  
22 71  
23

## 24 72 **ARTICLE SUMMARY**

### 26 73 **Strengths and limitations of this study**

- 29 74 • The use of comprehensive assessment battery, including actigraphy and circadian assessment, and  
30  
31 75 collection of metabolic and inflammatory markers to help acquire a greater understanding of the  
32  
33 76 mechanisms of antidepressant action of adjunctive brexpiprazole.
- 35 77 • This trial will help to inform personalised treatment plans for specific clinical phenotypes, placing the  
37  
38 78 participant at the centre of care.
- 40 79 • As part of the study, all participants will receive a psychoeducational session about sleep and  
41  
42 80 circadian rhythms with information on how to improve their sleep based on their actigraphy data  
43  
44
- 45 81 • This trial focuses on the measurement of the 24-hour sleep-wake cycle and will not examine the  
46  
47 82 sleep quality or the parameters of any sleep disorder.
- 49 83 • Circadian assessment used in the study will provide important information about the participants  
51  
52 84 current sleep wake cycle patterns but will not include the assessment of the possible factors that  
53  
54 85 may be contributing to circadian rhythms disruption in the long term.  
55  
56  
57  
58  
59  
60

## INTRODUCTION

In young adults, Major Depressive Disorder (MDD) is highly prevalent, recurrent, and comorbid with other mental and physical conditions, generating a substantial burden of disease and disability [1, 2]. While multiple psychological and pharmacological treatments are commonly provided, a large proportion of patients fail to respond to first-line psychotherapy or antidepressant treatments [3-10], and augmentation with a second generation antipsychotic is often recommended in these treatment-resistant cases [11, 12]. Sleep-wake cycle disturbances are common features of depressive disorders, including insomnia [13-15], hypersomnia [16, 17], abnormal sleep duration [13, 14], and abnormal timing of 24-hour patterns of rest/activity [18, 19]. Moreover, abnormalities in biological circadian rhythms (e.g., melatonin) have been reported [20, 21], suggesting that in some cases sleep disturbances are accompanied or underpinned by disturbances of the underlying circadian system [22].

The human circadian system is controlled by a master oscillator in the brain's hypothalamus (suprachiasmatic nucleus) which projects to circuits that govern bio-behavioural processes altered in depression (e.g., mood, vigilance, 24-hour sleep-wake cycle). The circadian system is primarily entrained by bright light, and its functioning can be disrupted by factors including aberrant light exposure and irregular sleep-wake behaviours [23, 24]. Adolescents and young adults are particularly vulnerable to circadian perturbations due to significant developmental changes in circadian rhythms across this age period [25], and sleep-wake phase delays are common in young people with depressive disorders [26]. Recently, we reported delayed and disrupted circadian rhythms in a subgroup of young people with depressive disorders (who also presented with greater symptom severity) [27]. During adolescence there is a phase shift in the circadian rhythm of the sleep-wake cycle, such that adolescents typically develop a bio-behavioural preference for going to sleep later and waking later (a manifestation of changes in the biology of the circadian system) [28, 29]. Furthermore, there is some evidence that correction of circadian abnormalities is associated with antidepressant effects of treatments targeting the circadian system such as Agomelatine [30] and light therapy [31].

1  
2 112  
3  
4 113 Brexpiprazole is a second generation antipsychotic with demonstrated efficacy by multiple randomised  
5  
6 114 controlled trials as an adjunct to antidepressant treatment in MDD in adults [32-35]; however the  
7  
8 115 mechanism of antidepressant action is unknown [36]. The pharmacodynamic properties of brexpiprazole,  
9  
10  
11 116 together with evidence from preclinical studies, suggest that there may be specific effects on anxiety,  
12  
13 117 cognitive function, and sleep [36, 37]. Further, there is preliminary evidence to suggest that brexpiprazole  
14  
15 118 may have greater effectiveness in subgroups of depressed patients with sleep disturbances, anxiety, or  
16  
17 119 irritability [22, 38]. As an adjunctive treatment in MDD patients with inadequate response to  
18  
19  
20 120 antidepressant treatment, brexpiprazole has been reported to lead to clinical improvement of sleep  
21  
22 121 disturbances (e.g., insomnia) and depressive symptoms, as well as improvement of daytime alertness and  
23  
24 122 functioning [39]. This pattern of changes is consistent with effects on circadian rhythms, with potential  
25  
26 123 influences on the entire 24-hour pattern of rest/activity, rather than simply on sleep period in isolation.  
27  
28  
29 124 To improve the personalisation of treatment selection for mood disorders, a greater understanding of the  
30  
31 125 mechanisms of antidepressant action of specific compounds is needed.  
32

33 126  
34  
35 127 Accordingly, in this clinical trial we aim to investigate whether the effect of brexpiprazole on depressive  
36  
37 128 symptoms is associated with changes in 24-hour sleep-wake cycle or circadian parameters in young people  
38  
39  
40 129 with MDD. While disturbances in electrophysiological measures of sleep (e.g., REM sleep) have been  
41  
42 130 considered by some to represent biomarkers for depression [40-43], this trial focuses instead on the  
43  
44 131 investigation and measurement of bio-behavioural changes associated with the circadian system (e.g.,  
45  
46 132 rest/activity, melatonin, cortisol, and core body temperature rhythms), rather than changes in  
47  
48  
49 133 electrophysiological sleep architecture (which is beyond the scope of this study).  
50

51 134

## 53 135 **METHODS AND ANALYSIS**

### 55 136 **Study Objectives**

57

58

59

60

1  
2 137 The primary objective of this study is to determine if changes in depressive symptoms following adjunctive  
3  
4 138 brexpiprazole treatment are correlated with changes in sleep-wake cycle or circadian parameters in young  
5  
6 139 people with depressive syndromes.

8  
9 140  
10  
11 141 The secondary objective is to determine if changes in social and occupational functioning following  
12  
13 142 adjunctive brexpiprazole are correlated with changes in sleep-wake cycle or circadian parameters in young  
14  
15 143 people with depressive syndromes.

17  
18 144  
19  
20 145 The tertiary objectives of this study are to determine if changes in depressive symptoms or changes in  
21  
22 146 sleep-wake cycle or circadian parameters following adjunctive brexpiprazole treatment are associated  
23  
24 147 with a range of multidimensional outcome measures in young people with depressive syndromes[44].  
25  
26 148 These include other mental illness symptoms, self-harm and suicidal thoughts and behaviours, physical  
27  
28 149 health parameters, alcohol and substance use, and genomic markers.

### 31 150 32 33 151 **Trial design**

34  
35 152 This investigator-initiated, mechanistic study involving 50 young people with depressive syndromes and  
36  
37 153 sleep-wake cycle disturbances is designed as a 16-week (8 weeks active treatment, 8 weeks follow-up)  
38  
39 154 open-label, single-arm, phase IV clinical trial.

### 41 42 155 43 44 156 **Participants**

45  
46 157 Participants aged 18-30 years with a diagnosis of MDD according to DSM-5 criteria on a current  
47  
48 158 antidepressant treatment of either selective serotonin reuptake inhibitor (SSRI) or serotonin-  
49  
50 159 norepinephrine reuptake inhibitor (SNRI) with a disrupted sleep-wake cycle will be recruited through the  
51  
52 160 youth mental health clinics associated with the Brain and Mind Centre (BMC), University of Sydney. All  
53  
54 161 participants will provide written informed consent. The research team will make explicit to any potential  
55  
56 162 participants both verbally and in writing (in the Participant Information Statement) that participation is  
57  
58 163 voluntary and will not affect the patient's care received by the mental health service.

1  
2 164  
3  
4 165 The inclusion criteria for this trial are: (i) aged 18-30, (ii) diagnosis of MDD as per DSM-5 (Structured  
5  
6 166 Clinical Interview for DSM; SCID[45]) criteria, (iii) current major depressive episode (MDE) of moderate  
7  
8  
9 167 severity as defined by a Quick Inventory of Depressive Symptomatology (QIDS)[46] rating  $\geq 11$  at two  
10  
11 168 assessments two weeks apart, (iv) failure to respond to at least one adequate (minimum four weeks) trial  
12  
13 169 of pharmacological treatment, (v) current antidepressant treatment with SSRI or SNRI for at least 6 weeks,  
14  
15 170 at a stable dose for two weeks prior to study commencement, and (vi) a perturbed sleep-wake cycle as  
16  
17 171 evidenced by: delayed sleep onset; delayed sleep offset; disrupted sleep; high day-to-day variability of  
18  
19  
20 172 sleep-wake cycle; non-restorative sleep; or daytime fatigue.

21  
22 173  
23  
24 174 Exclusion criteria are: (i) any adjunctive antipsychotic treatment for current episode in the past month, (ii)  
25  
26 175 use of medications which affect sleep, (iii) primary psychotic disorder diagnosis, (iv) acute suicidal  
27  
28  
29 176 behaviour (score of 6 on Comprehensive Assessment of At-Risk Mental States (CAARMS) item 7.3[47]), (v)  
30  
31 177 medical condition contributing to sleep-wake dysfunction, (vi) significant alcohol or substance misuse or  
32  
33 178 dependence (assessed via DSM-5 SCID[45] and World Health Organisation Alcohol, Smoking and  
34  
35 179 Substance Involvement Screening Test (WHO-ASSIST[48, 49]), (vii) shift work or (viii) recent transmeridian  
36  
37 180 travel (i.e., participants will be required to wait three days for each jet lag hour before entering the study),  
38  
39  
40 181 (ix) previous hypersensitivity to brexpiprazole, (x) taking CYP2D6 or CYP3A4 inhibitors (or other  
41  
42 182 contraindicated medications listed in the Rexulti product information), and (xi) pregnancy or lactation.

43  
44 183

#### 45 46 47 184 **Study course and procedure**

48  
49 185 Patients presenting for mental health care who may be eligible for the study will be screened by phone before  
50  
51 186 being invited to participate and attending an enrolment visit. The enrolment visit will formally assess  
52  
53 187 eligibility criteria and confirm the presence of MDD as per DSM-5 (SCID)[45]. Participants will be provided  
54  
55 188 with an actigraphy device (non-invasive wrist-worn device used to objectively measure rest/activity patterns)  
56  
57  
58 189 and will be given instructions to wear the device for the following two-week period.

59  
60 190

1  
2 191 *Visit 1 (Baseline):* Within two weeks of completing the diagnostic and screening assessments, data from  
3  
4 192 the actigraphy device will be downloaded and reviewed. A further assessment of depressive symptom  
5  
6 193 severity (QIDS Clinician-Rated; QIDS-CR)[46] will be conducted to ensure participants meet all inclusion  
7  
8  
9 194 criteria. Bloods will be collected for assessment of metabolic and inflammatory measures and genomic  
10  
11 195 analysis. Clinical and self-report assessments will be conducted, as well as circadian assessments in which  
12  
13 196 participants will remain in the sleep lab overnight. The following morning, participants will attend a 1-  
14  
15 197 hour psychoeducation session about sleep and circadian rhythms covering the following topics: i) sleep  
16  
17 198 and circadian education with tailored discussion based on their personal actigraphy data; ii) individualized  
18  
19 199 plan for progressive sleep rescheduling; and iii) lifestyle factors and behaviours impacting on sleep (e.g.,  
20  
21 200 exercise, light, sleep environment, sleep regulation, foods, stress, anxiety, mood).  
22  
23  
24 201

25  
26 202 Once all baseline clinical and self-report assessments have been conducted, and the medical assessment  
27  
28 203 completed by the study doctor to confirm inclusion and exclusion criteria, participants will be issued with  
29  
30 204 the study medication to receive 8 weeks of open-label pharmacotherapy with brexpiprazole (REXULTI®-  
31  
32 205 Lundbeck) as adjunctive to their stable psychotropic medication (treatment as usual). Brexpiprazole will  
33  
34 206 be provided to participants at Visit 1 (Baseline) and Visit 2 (Week 4) for the following four weeks and will  
35  
36 207 be titrated from 1 mg once daily in week 1, to 2 mg once daily in weeks 2-8.  
37  
38  
39

40 208  
41  
42 209 Patients will receive 2mg/day, once daily as tablets, for oral use. The brexpiprazole dosage will be steadily  
43  
44 210 increased from 1mg/day during week 1, to 2mg/day during weeks 2-8 (up-titration). This is the dosage and  
45  
46 211 titration regime recommended for adjunctive use in major depression by the Federal Drug Administration  
47  
48 212 (USA). Several previous clinical trials have used this titration regime from 1mg to 2mg [33, 39, 50], and a  
49  
50 213 dose of 2mg has been shown to be effective in reducing depressive symptoms [32]. As doses higher than  
51  
52 214 2mg have been shown to increase incidence of akathisia [36], a maximum dose of 2mg will be used in the  
53  
54 215 present study to minimise side effects.  
55  
56  
57

58 216  
59  
60

1  
2 217 *Monitoring visits:* Participants will be contacted by telephone on a weekly basis for the duration of the 8-  
3  
4 218 week treatment period to monitor adverse events and adherence. Any changes in concomitant  
5  
6 219 medications will also be investigated and recorded. In addition, participants will be provided with a  
7  
8  
9 220 medication diary and asked to complete during the study to monitor adherence. More detailed  
10  
11 221 information about potential side-effects will be further assessed by the study doctor at visits 2, 3, 4 and 5  
12  
13 222 using the UKU Side Effect Rating Scale [51], Abnormal Involuntary Movement Scale (AIMS) [52] and the  
14  
15 223 Simpson-Angus Scale (SAS) [53] for evaluation of extrapyramidal symptoms (EPS).

16  
17  
18 224  
19  
20 225 *Visit 2 (Week 4):* Following four weeks of the treatment phase, participants will return for clinical and self-  
21  
22 226 report assessments to assess changes in clinical and functional measures.

23  
24 227  
25  
26  
27 228 *Visit 3 (Week 8):* Following eight weeks of the treatment phase, participants will return to complete clinical  
28  
29 229 and self-report assessments and will also complete a second circadian (overnight) in-lab assessment.  
30  
31 230 Bloods will be collected at this visit for follow-up metabolic and inflammatory markers.

32  
33 231  
34  
35  
36 232 *Visit 4 and 5 (Follow-up visits 1 and 2, 12 and 16 weeks respectively):* Twelve and sixteen weeks after  
37  
38 233 commencing treatment (i.e., four and eight weeks after completing the eight-week treatment period  
39  
40 234 respectively), participants will return to complete clinical and self-report assessments. Participants will be  
41  
42 235 provided with an actigraphy device to wear for two weeks prior to these assessments.

43  
44  
45 236  
46  
47 237 Participants will be reimbursed for their time and the cost of transportation to and from the research sites.

48  
49 238

## 50 51 239 **Outcomes**

52  
53 240

### 54 55 241 **Primary Outcome Measures**

56  
57  
58 242 The primary endpoint will be the correlation between change in sleep-wake and circadian parameters and  
59  
60 243 change in depressive symptoms from baseline to week eight. Notably, the primary depressive symptom

measures (QIDS-CR total score, QIDS-Self Report (QIDS-SR) total score, The Montgomery–Åsberg Depression Rating Scale (MADRS) total score) contain sleep items. These will be removed from these scales for analyses to provide a measure of depressive symptoms not biased by changes in sleep-wake parameters.

Primary sleep-wake and circadian variables of interest include actigraphy parameters, as well as in-lab circadian and self-report measures.

### Secondary Outcome Measures

The secondary endpoint will be correlation between change in sleep-wake and circadian parameters and change in functioning from baseline to week eight.

### Tertiary Outcome Measures

Tertiary endpoints will be correlation between change in sleep-wake and circadian parameters and other multidimensional outcome measures based on assessments of symptoms, self-harm and suicidal thoughts and behaviours, physical health, and alcohol and substance use.

Further tertiary endpoints will be comparison of primary endpoints between Clinical Stages [54-57], illness trajectories [58], and genomic variants with potential relevance to mood disorders and/or circadian rhythms (e.g. CLOCK, BMAL1).

Detailed outcome measures are summarized in Table 1. **Table 1 – Primary, Secondary and Tertiary**

### Outcome Measures

| Primary Outcome Measures<br>(Correlation between change in sleep-wake and circadian parameters and change in depressive symptoms from baseline to week eight) | Secondary Outcome Measures<br>(Correlation between change in sleep-wake and circadian parameters and change in functioning from baseline to week eight) | Tertiary Outcome measures<br>(Correlation between change in sleep-wake and circadian parameters and other multidimensional outcome measures) |
|---------------------------------------------------------------------------------------------------------------------------------------------------------------|---------------------------------------------------------------------------------------------------------------------------------------------------------|----------------------------------------------------------------------------------------------------------------------------------------------|
| Primary depressive symptom measures:                                                                                                                          | Functioning measures:                                                                                                                                   | Symptom Measures:                                                                                                                            |



|                                                                                                                                                                                                                                                                                                                                                                                                                                                                                                                                                                                                                                                                                                                                                                                                                                                                                                                                                                                                                                                                                                                                                                                                                                                                                                                                                                                                                                                                                                                                                                                                                                                                                                                                                                                                                                                                                                                     |                                                                                                                                                                                                                                                                                                                                                                                                                                    |                                                                                                                                                                                                                                                                                                                                                                                                                                                                                                                                                                                                                                                                                                                                                                                                                                                                                                                                                                                                                                                                                                                                                                                                                                                                                                                                                                                                                 |
|---------------------------------------------------------------------------------------------------------------------------------------------------------------------------------------------------------------------------------------------------------------------------------------------------------------------------------------------------------------------------------------------------------------------------------------------------------------------------------------------------------------------------------------------------------------------------------------------------------------------------------------------------------------------------------------------------------------------------------------------------------------------------------------------------------------------------------------------------------------------------------------------------------------------------------------------------------------------------------------------------------------------------------------------------------------------------------------------------------------------------------------------------------------------------------------------------------------------------------------------------------------------------------------------------------------------------------------------------------------------------------------------------------------------------------------------------------------------------------------------------------------------------------------------------------------------------------------------------------------------------------------------------------------------------------------------------------------------------------------------------------------------------------------------------------------------------------------------------------------------------------------------------------------------|------------------------------------------------------------------------------------------------------------------------------------------------------------------------------------------------------------------------------------------------------------------------------------------------------------------------------------------------------------------------------------------------------------------------------------|-----------------------------------------------------------------------------------------------------------------------------------------------------------------------------------------------------------------------------------------------------------------------------------------------------------------------------------------------------------------------------------------------------------------------------------------------------------------------------------------------------------------------------------------------------------------------------------------------------------------------------------------------------------------------------------------------------------------------------------------------------------------------------------------------------------------------------------------------------------------------------------------------------------------------------------------------------------------------------------------------------------------------------------------------------------------------------------------------------------------------------------------------------------------------------------------------------------------------------------------------------------------------------------------------------------------------------------------------------------------------------------------------------------------|
| <p>1</p> <p>2</p> <p>3</p> <p>4</p> <p>5</p> <p>6</p> <p>7</p> <p>8</p> <p>9</p> <p>10</p> <p>11</p> <p>12</p> <p>13</p> <p>14</p> <p>15</p> <p>16</p> <p>17</p> <p>18</p> <p>19</p> <p>20</p> <p>21</p> <p>22</p> <p>23</p> <p>24</p> <p>25</p> <p>26</p> <p>27</p> <p>28</p> <p>29</p> <p>30</p> <p>31</p> <p>32</p> <p>33</p> <p>34</p> <p>35</p> <p>36</p> <p>37</p> <p>38</p> <p>39</p> <p>40</p> <p>41</p> <p>42</p> <p>43</p> <p>44</p> <p>45</p> <p>46</p> <p>47</p> <p>48</p> <p>49</p> <p>50</p> <p>51</p> <p>52</p> <p>53</p> <p>54</p> <p>55</p> <p>56</p> <p>57</p> <p>58</p> <p>59</p> <p>60</p> <ul style="list-style-type: none"> <li>• QIDS-CR total score (minus sleep items)</li> <li>• QIDS-Self Report (QIDS-SR) total score (minus sleep items)</li> <li>• The Montgomery-Åsberg Depression Rating Scale (MADRS) total score (minus sleep items)</li> </ul> <p><b>Primary sleep-wake and circadian variables of interest:</b></p> <p>Actigraphy parameters (in the two-week period prior to baseline and prior to week eight):</p> <ul style="list-style-type: none"> <li>• Sleep onset time</li> <li>• Sleep offset (wake) time</li> <li>• Total sleep time (duration)</li> <li>• Wake after sleep onset (estimation of number of minutes awake during the sleep period)</li> <li>• Sleep efficiency (% of sleep period estimated as sleep)</li> <li>• Inter-daily stability</li> <li>• Intra-daily variability</li> </ul> <p><b>In-lab circadian measures:</b></p> <ul style="list-style-type: none"> <li>• Dim Light Melatonin Onset (DLMO) timing</li> <li>• Phase angle (time lapse) between DLMO and habitual sleep</li> <li>• Core body temperature nadir</li> <li>• Evening cortisol area under the curve</li> </ul> <p><b>Self-report measures:</b></p> <ul style="list-style-type: none"> <li>• Non-restorative sleep score (based on the Pittsburgh Sleep Quality Index</li> </ul> | <ul style="list-style-type: none"> <li>• Social and Occupational Functioning Assessment Scale (SOFAS) rating</li> <li>• The Work and Social Adjustment Scale (WSAS) total score</li> <li>• Adapted Schuster Social Support Scale (SSSS) total score</li> <li>• Not in Education, Employment, or Training (NEET) status</li> <li>• Number of days 'out of role' (unable to perform usual activities) in the past 30 days</li> </ul> | <ul style="list-style-type: none"> <li>• Young Mania Rating Scale (YMRS) total score</li> <li>• Brief Psychiatric Rating Scale (BPRS) total score and subscale scores</li> <li>• Overall Anxiety Severity Impairment Scale (OASIS) total score</li> <li>• Altman Self-Rating Mania scale (ASRM) total score</li> <li>• Prodromal Questionnaire (brief version) (PQ-16) total score</li> <li>• DSM-5 Primary Care Post-Traumatic Stress Disorder screen (PC-PTSD-5) total score</li> <li>• Adapted Eating Disorder Examination (EDE) total score</li> <li>• Clinical Global Impressions scale (CGI) severity and improvement scores</li> </ul> <p><b>Self-harm and suicidal thoughts and behaviours:</b></p> <ul style="list-style-type: none"> <li>• Suicidal risk (score from Suicidal Ideation Attributes Scale (SIDAS) and Columbia-Suicide Severity Rating Scale (C-SSRS) items)</li> <li>• Adapted Brief Non-Suicidal Self-Injury Assessment Tool (B-NSSI-AT) total score</li> </ul> <p><b>Physical Health:</b></p> <ul style="list-style-type: none"> <li>• Body Mass Index (BMI) calculated from height and weight</li> <li>• Waist circumference</li> <li>• International Physical Activity Questionnaire (IPAQ) total score</li> <li>• Metabolic blood markers including triglycerides, cholesterol (total, Low Density Lipoprotein (LDL), High Density Lipoprotein (HDL)), and Homeostasis</li> </ul> |
|---------------------------------------------------------------------------------------------------------------------------------------------------------------------------------------------------------------------------------------------------------------------------------------------------------------------------------------------------------------------------------------------------------------------------------------------------------------------------------------------------------------------------------------------------------------------------------------------------------------------------------------------------------------------------------------------------------------------------------------------------------------------------------------------------------------------------------------------------------------------------------------------------------------------------------------------------------------------------------------------------------------------------------------------------------------------------------------------------------------------------------------------------------------------------------------------------------------------------------------------------------------------------------------------------------------------------------------------------------------------------------------------------------------------------------------------------------------------------------------------------------------------------------------------------------------------------------------------------------------------------------------------------------------------------------------------------------------------------------------------------------------------------------------------------------------------------------------------------------------------------------------------------------------------|------------------------------------------------------------------------------------------------------------------------------------------------------------------------------------------------------------------------------------------------------------------------------------------------------------------------------------------------------------------------------------------------------------------------------------|-----------------------------------------------------------------------------------------------------------------------------------------------------------------------------------------------------------------------------------------------------------------------------------------------------------------------------------------------------------------------------------------------------------------------------------------------------------------------------------------------------------------------------------------------------------------------------------------------------------------------------------------------------------------------------------------------------------------------------------------------------------------------------------------------------------------------------------------------------------------------------------------------------------------------------------------------------------------------------------------------------------------------------------------------------------------------------------------------------------------------------------------------------------------------------------------------------------------------------------------------------------------------------------------------------------------------------------------------------------------------------------------------------------------|

|                                                                                                                                                                                                                                                                                                                                                                                                                                                                                                                                                        |  |                                                                                                                                                                                                                                                                                                                                                                                                                                                                                                                                                                                                                                                                                                                                                                                                                                                                                                                                                                                                                                                       |
|--------------------------------------------------------------------------------------------------------------------------------------------------------------------------------------------------------------------------------------------------------------------------------------------------------------------------------------------------------------------------------------------------------------------------------------------------------------------------------------------------------------------------------------------------------|--|-------------------------------------------------------------------------------------------------------------------------------------------------------------------------------------------------------------------------------------------------------------------------------------------------------------------------------------------------------------------------------------------------------------------------------------------------------------------------------------------------------------------------------------------------------------------------------------------------------------------------------------------------------------------------------------------------------------------------------------------------------------------------------------------------------------------------------------------------------------------------------------------------------------------------------------------------------------------------------------------------------------------------------------------------------|
| <p>(PSQI), and Munich Chronotype Questionnaire (MCTQ)</p> <ul style="list-style-type: none"> <li>• <i>Pittsburgh Sleep Quality Index (PSQI)</i> total score</li> <li>• <i>Epworth Sleepiness Score (ESS)</i> total score</li> <li>• <i>Insomnia Severity Index (ISI)</i> total score</li> <li>• <i>Morningness -Eveningness Questionnaire (MEQ)</i> total score*</li> <li>• <i>Seasonal Pattern Assessment Questionnaire (SPAQ)</i> total score*</li> </ul> <p>*Baseline scores will be used rather than change scores as these are trait measures</p> |  | <p>Model of Insulin Resistance (HOMA2-IR) calculated from fasting glucose and insulin measures</p> <ul style="list-style-type: none"> <li>• Inflammatory blood markers including Interleukin-1<math>\beta</math> (IL-1<math>\beta</math>), Interleukin-6 (IL-6), Tissue Necrosis Factor (TNF-<math>\alpha</math>), C-Reactive Protein (CRP)</li> </ul> <p><b>Alcohol and Substance Use:</b></p> <ul style="list-style-type: none"> <li>• World Health Organisation Alcohol, Smoking, and Substance Involvement Screening Test (WHO ASSIST) score for tobacco, and cannabis</li> <li>• Alcohol Use Disorders Identification Test-Consumption (AUDIT C) total score</li> <li>• WHO ASSIST alcohol-related impairment</li> <li>• Age of onset of alcohol use</li> </ul> <p><b>Comparison of primary endpoints between:</b></p> <ul style="list-style-type: none"> <li>• Clinical Stages</li> <li>• Illness Trajectories</li> <li>• Genomic variants with potential relevance to mood disorders and/or circadian rhythms (e.g., CLOCK, BMAL1).</li> </ul> |
|--------------------------------------------------------------------------------------------------------------------------------------------------------------------------------------------------------------------------------------------------------------------------------------------------------------------------------------------------------------------------------------------------------------------------------------------------------------------------------------------------------------------------------------------------------|--|-------------------------------------------------------------------------------------------------------------------------------------------------------------------------------------------------------------------------------------------------------------------------------------------------------------------------------------------------------------------------------------------------------------------------------------------------------------------------------------------------------------------------------------------------------------------------------------------------------------------------------------------------------------------------------------------------------------------------------------------------------------------------------------------------------------------------------------------------------------------------------------------------------------------------------------------------------------------------------------------------------------------------------------------------------|

**Assessments**

Assessments used here are based on the multidimensional assessment and outcomes framework [44] and include clinical and self-report ratings of mental health symptoms, social and occupational functioning, self-harm, suicidal thoughts and behaviours, physical health, alcohol and substance use, illness type, stage and trajectory, as well as circadian parameters and metabolic, inflammatory and genomic markers.

1  
2 273 Our recent research [44, 59-61] indicates the capacity of the multidimensional outcomes framework to  
3  
4 274 further our understanding of the pathophysiological mechanisms and illness progression in this cohort, as  
5  
6 275 well as to inform more personalized and measurement-based models of care.  
7

8  
9 276

#### 10 11 277 Diagnostic assessments

12  
13 278 The presence of MDD and any comorbidity will be evaluated using the Structured Clinical Interview for  
14  
15 279 DSM-5 Axis I Disorders (SCID) [45]. This assessment is expected to take 30-75 minutes to complete.  
16

17  
18 280

#### 19 20 281 Mental Risk Assessment

21  
22 282 Acute suicidal behaviour will be assessed by relevant subscale of the Comprehensive Assessment of At-  
23  
24 283 Risk Mental States (CAARMS) [47]. This assessment is expected to take 5 minutes to complete.  
25

26  
27 284

#### 28 29 285 Clinical Assessments

30  
31 286 1. *Clinical-rated Quick Inventory of Depressive Symptomatology (QIDS-CR)* [46]: assesses the nine  
32  
33 287 criterion symptom domains designated by the DSM to diagnose a MDE.

34  
35 288 2. *Montgomery-Åsberg Depression Rating Scale (MADRS)* [62]: will also be used to assess depressive  
36  
37 289 symptoms, to allow for direct comparisons with previous studies of brexpiprazole in MDD.

38  
39  
40 290 3. *Young Mania Rating Scale (YMRS)* [63]: an 11-item, multiple-choice diagnostic questionnaire which  
41  
42 291 psychiatrists use to measure the severity of manic episodes.

43  
44 292 4. *Brief Psychiatric Rating Scale (BPRS)* [64]: used to measure psychiatric symptoms (e.g., depression,  
45  
46 293 anxiety, hallucinations, unusual behaviour).

47  
48  
49 294 5. *Social and Occupational Functioning Assessment Scale (SOFAS)* [65]: clinician-rated measure used  
50  
51 295 to assess functioning on a 0-100 scale (lower scores suggesting greater impairment).

52  
53 296 6. *Clinical Global Impressions scale (CGI)* [66]: will be used as a measure of clinical improvement.

54  
55  
56  
57 297 7. Participants will also be rated on previously established *clinical stage* [54-57] and *illness trajectory*  
58  
59 298 [58] models on the basis of information collected throughout the clinical interview. The clinical staging  
60

1  
2 299 framework differentiates those in the earliest phases of mental health problems with non-specific  
3  
4 300 clinical presentations (stage 1a; ‘help-seeking’) from those at greater-risk with more specific, sub-  
5  
6 301 threshold presentations (stage 1b; ‘attenuated syndromes’) and those who have already reached a  
7  
8  
9 302 threshold for a progressive or recurrent disorder meeting diagnostic criteria (stage 2, 3, or 4). The  
10  
11 303 illness trajectory model is a novel tripartite framework based on three proposed pathophysiological  
12  
13 304 pathways leading to youth-onset mental disorders: (i) “neurodevelopmental-psychosis”, (ii)  
14  
15 305 “circadian-bipolar spectrum”, and (iii) “hyperarousal-anxious depression”[67-69].

17  
18 306 8. *World Health Organisation (WHO) Alcohol, Smoking and Substance Involvement Screening Test*  
19  
20 307 (*WHO-ASSIST*) [48, 49]: a reliable, culturally adaptable, valid screening test for problematic or risky  
21  
22 308 substance use.

24 309 The clinical interview is expected to take around 35 minutes to complete.

#### 29 311 Self-report Assessments

- 31 312 1. *Demographics and Mental Health History*: including details of work and education, physical health  
32  
33 313 (height, weight, waist circumference), history of mental health, and family history
- 35 314 2. *International Physical Activity Questionnaire (IPAQ) - short version* [70, 71]: 7-item questionnaire  
36  
37 315 providing internationally comparable data on health-related physical activity.
- 40 316 3. *Alcohol Use Disorders Identification Test – Consumption (AUDIT-C)* [72]: includes three short  
41  
42 317 questions that estimate alcohol consumption in a standard, meaningful, non-judgmental manner.  
43  
44 318 Additional questions assessing age of onset of alcohol consumption will also be used.
- 46 319 4. *Suicidal Ideation Attributes Scale (SIDAS)* [73]: 5-item self-report questionnaire assessing the  
47  
48 320 frequency, controllability, closeness to attempt, distress, and interference with daily activities on  
49  
50 321 a 10-point Likert scale over the past month.
- 53 322 5. *Columbia-Suicide Severity Rating Scale (C-SSRS)* [74]: The scale comprises 3 sections: suicidal  
54  
55 323 ideation, intensity of ideation, and suicidal behaviour. A self-rating adaptation will be used in  
56  
57 324 combination with the SIDAS.

- 1  
2 325 6. *Brief Non-Suicidal Self-Injury Assessment Tool (B-NSSI-AT)* [75]: designed to assess primary (such  
3  
4 326 as form, frequency, and function) and secondary (including but not limited to NSSI habituation;  
5  
6 327 contexts in which NSSI is practiced; and NSSI perceived life interference, treatment, and impacts)  
7  
8  
9 328 NSSI characteristics.
- 10  
11 329 7. *Quick Inventory of Depressive Symptomatology – self-report (QIDS-SR)* [76]: a self-rating (SR)  
12  
13 330 version includes 16 questions with equivalent weightings (0-3) for each symptom item that  
14  
15 331 assesses the nine criterion symptom domains designated by the DSM-IV to diagnose a MDE.
- 16  
17 332 8. *Overall Anxiety Severity Impairment Scale (OASIS)* [77]: 5-item self-report measure used to assess  
18  
19  
20 333 severity and impairment associated with any anxiety disorder or multiple anxiety disorders.
- 21  
22 334 9. *Altman Self-Rating Mania Scale (ASRM)* [78]: 5-item self-rating scale designed to assess the  
23  
24 335 presence and/or severity of manic symptoms.
- 25  
26 336 10. *Primary Care Post-Traumatic Stress Disorder Screen for DSM-5 (PC-PTSD-5)* [79]: 5-item screen  
27  
28  
29 337 designed for use in primary care settings to identify respondents with probable PTSD.
- 30  
31 338 11. *Prodromal Questionnaire (PQ-16)* [80]: self-report screen for use in secondary mental health care  
32  
33 339 services to select subjects for psychosis risk.
- 34  
35 340 12. *Eating Disorder Examination (EDE)* [81, 82]: comprises a range of health-related and demographic  
36  
37  
38 341 questions, including present height and weight, and a detailed and comprehensive assessment of  
39  
40 342 symptoms, particularly binge eating. In this study, three eating disorder behaviours are assessed:  
41  
42 343 binge eating, purging, and strict dieting or fasting.  
43  
44 344 13. *Sleep questions*: 7 questions regarding time falling asleep, waking up during weekdays and  
45  
46  
47 345 weekends, hours of sleep, feelings when waking up. Sleep timing items are based on the  
48  
49 346 Pittsburgh Sleep Quality Index (PSQI) and Munich Chrono Type Questionnaire (MCTQ), while sleep  
50  
51 347 quality items are based on expert consensus in the literature.  
52  
53 348 14. *Work and Social Adjustment Scale (WSAS)* [83]: 5-item scale of functional impairment attributable  
54  
55  
56 349 to an identified problem.  
57  
58  
59  
60

1  
2 350 15. *Schuster Social Support Scale (SSSS)* [84]: 15-item measure of social support used to examine an  
3  
4 351 individual's social relationships with others (relatives, friends, spouse) and the associated impact  
5  
6 352 on their emotional functioning  
7

8  
9 353 16. *Additional sleep questionnaires*: participants will complete the BMC sleep-wake self-report  
10  
11 354 questionnaire battery including questions regarding ethnicity, caffeine consumption, menstrual  
12  
13 355 cycle, visual impairments, and non-restorative sleep, as well as the *Pittsburgh Sleep Quality*  
14  
15 356 *Inventory (PSQI)* [85], *Epworth Sleepiness Scale (ESS)* [86], *Insomnia Severity Index (ISI)* [87], *Horne-*  
16  
17 357 *Ostberg Morningness-Eveningness Questionnaire (MEQ)* [88], and the *Seasonal Patterns*  
18  
19 358 *Assessment Questionnaire (SPAQ)* [89].  
20  
21

22 359 The questionnaires are tailored (using skip logic) to the individual so the amount of time taken to complete  
23  
24 360 the questionnaire varies, but we estimate that on average the self-report assessment will take 45 minutes  
25  
26 361 to complete.  
27  
28

### 29 362

#### 30 363 **Sleep wake assessments**

31 364 24-hour sleep-wake and circadian rest-activity parameters will be measured by actigraphy  
32  
33 365 recordings. Actigraphy is a non-invasive tool to objectively measure activity profiles used to estimate  
34  
35 366 sleep and circadian patterns based on validated algorithms. Participants will be asked to complete  
36  
37 367 a sleep diary and to wear an actigraph (GENEActiv device; Activinsights, Kimbolton, UK) on the non-  
38  
39 368 dominant wrist for at least 10 days prior to commencing the study, and continuously for the 8-week  
40  
41 369 treatment phase. The device is comfortable and easy to use, battery operated wrist-worn device,  
42  
43 370 similar in appearance to Fitbit, designed to record and provide data on movement, light,  
44  
45 371 temperature and sleep patterns. The device will provide objective monitoring of participants' 24-  
46  
47 372 hour circadian rhythm, including their sleep onset and duration, rise time, any night-time sleep  
48  
49 373 interruptions, and activity patterns (for details, see Table 1). The device allows for the outputting of  
50  
51 374 real time raw measurement data for up to a month without charging. Instructions will be provided  
52  
53 375 to participants on how to use the device upon their recruitment into the study. Two-week actigraphy  
54  
55  
56  
57  
58  
59  
60

1  
2 376 recordings will also be completed at the 12- and 16-week follow up assessments. The GENEActiv  
3  
4 377 devices have been validated against several types of accelerometry-based activity monitors [90-93]  
5  
6  
7 378 as well as for sleep-wake scoring [94, 95]. For decades, actigraphy monitors like the GENEActiv  
8  
9 379 devices have been used extensively in research to measure sleep and activity patterns in diverse  
10  
11  
12 380 clinical settings including sleep disorders, medical illnesses (e.g. cancer, neurodegenerative  
13  
14 381 diseases) and mental disorders (e.g. anxiety, depression, bipolar, and psychotic disorders) [19, 96,  
15  
16  
17 382 97].

18  
19 383

20

21 384

22

23 385

24

25 386

26

27 387

28

29 388

30

31 389

32

33 390

34

35 391

36

37 392

38

39 393

40

41 394

42

43 395

44

45 396

46

47 397

48

49 398

50

51 399

52

53 400

54

55 401

56

57 402

58

59 403

60

### **In-Lab Circadian Assessment**

Biological circadian rhythms will be measured in an evening/overnight recording period, including collection of salivary melatonin, salivary cortisol, and core body temperature to characterise 24-hour rhythms. All circadian assessments will be performed in accordance with established Dim Light Melatonin Onset (DLMO) protocols [98-101]. For details on the parameters measured, please refer to the in-lab circadian measures in Table 1.

### **Metabolic and inflammatory markers**

The following markers will be collected at Baseline and 8-weeks follow up visits: (i) Triglycerides, (ii) Cholesterol (including total, High Density Lipoprotein (HDL), and Low-Density Lipoprotein (LDL)), (iii) Fasting glucose, (iv) Fasting insulin, (v) Interleukin (IL)-1 $\beta$ , (vi) IL-6, (vii) Tissue Necrosis Factor (TNF)- $\alpha$ , (viii) C-Reactive Protein (CRP). Height, weight, and waist circumference will also be recorded. Furthermore, insulin resistance will be estimated based on paired fasting plasma glucose and insulin levels [102] by the updated homeostatic model assessment (HOMA2-IR) using iHOMA2 software V.8.8 [103].

### **Genomics**

Additional blood will be collected at baseline for the assessment of genomic risk markers as per established procedures from the University of Queensland Human Studies Unit.

1  
2 402 The schedule of trial assessments is summarized in Table 2.

3  
4 403 **Table 2. Schedule of assessments**

5  
6 404

|                                                                    | Enrolment Visit | Visit 1<br>(Baseline) | Visit 2<br>(Week 4) | Visit 3<br>(Week 8) | Visit 4<br>(Follow-up 1) | Visit 5<br>(Follow-up 2) |
|--------------------------------------------------------------------|-----------------|-----------------------|---------------------|---------------------|--------------------------|--------------------------|
| <i>Study week</i>                                                  |                 | <i>0</i>              | <i>4</i>            | <i>8</i>            | <i>12</i>                | <i>16</i>                |
| Informed Consent                                                   | ✓               |                       |                     |                     |                          |                          |
| Inclusion/Exclusion Criteria                                       | ✓               | ✓                     |                     |                     |                          |                          |
| Diagnostic Assessment<br>(SCID)                                    | ✓               |                       |                     |                     |                          |                          |
| Mental Risk Assessment<br>(CAARMS)                                 | ✓               | ✓                     | ✓                   | ✓                   | ✓                        | ✓                        |
| Demographics and Mental<br>Illness History                         |                 | ✓                     |                     |                     |                          |                          |
| Clinical Assessment (QIDS-<br>CR, MADRS, YMRS, BPRS,<br>SOFAS)     |                 | ✓                     | ✓                   | ✓                   | ✓                        | ✓                        |
| Self-report Assessment                                             |                 | ✓                     | ✓                   | ✓                   | ✓                        | ✓                        |
| Sleep-wake Assessment<br>(actigraphy monitoring)                   |                 | ✓                     | ✓                   | ✓                   | ✓                        | ✓                        |
| In-lab Circadian Assessment                                        |                 | ✓                     |                     | ✓                   |                          |                          |
| Blood Sample Collection<br>(Metabolic and<br>Inflammatory Markers) |                 | ✓                     |                     | ✓                   |                          |                          |
| Safety, side-effects, and<br>adherence assessment                  |                 |                       | ✓                   | ✓                   | ✓                        | ✓                        |
| IP dispensing                                                      |                 | ✓                     | ✓                   | ✓*                  | ✓*                       | ✓*                       |
| IP return                                                          |                 |                       | ✓                   | ✓                   |                          |                          |

31 405 \*if clinically indicated, at the discretion of the treating clinician

32  
33 406 In addition to the visits listed above, safety, side-effects, and adherence assessment will be conducted  
34  
35  
36 407 weekly between weeks 0 and 8 via phone calls.

37  
38 408  
39  
40 409 The Participant timeline is presented in Figure 1 – Study flow chart.

41  
42 410

#### 43 411 **Safety and Side-Effects Monitoring**

44  
45 412 Previous studies have shown that brexpiprazole is generally well tolerated, with no unexpected or severe  
46  
47 413 side effects [32, 35, 104, 105].

48  
49 414

50  
51 415 Safety and tolerability of the investigational product will be closely monitored throughout the trial. For the  
52  
53 416 duration of the 8-week treatment period, weekly phone calls will be conducted to participants to monitor  
54  
55 417 safety and elicit information regarding side effects and potential adverse events. Any changes in concomitant  
56  
57  
58  
59  
60



1  
2 418 medications will also be investigated and recorded. In addition, participants will be provided with a  
3  
4 419 medication diary and asked to complete during the study to monitor tolerability and adherence.  
5

6 420  
7  
8  
9 421 Further formal assessment of side effects and potential adverse events following the end of the treatment  
10  
11 422 phase will be conducted at the two follow-up visits (visit 4 and 5). At the baseline visit, participants will be  
12  
13 423 informed that any serious negative side effects should be reported to the study doctor immediately and will  
14  
15 424 be provided with the relevant contact details to do so.  
16

17  
18 425  
19  
20 426 All Adverse Events will be assessed for causality and symptom severity according to the study protocol and  
21  
22 427 followed up by the study doctor if required. In the occurrence of a Serious Adverse Event, appropriate  
23  
24 428 diagnostic and therapeutic measures will be taken and the participant will be kept under observation for as  
25  
26 429 long as is medically indicated. The Principal Investigator will then determine if the seriousness of the event  
27  
28  
29 430 warrants the removal of the participant from the study or abandonment of the study. For serious side effects  
30  
31 431 or medical problems, the patient may be taken immediately to Royal Prince Alfred Hospital for further  
32  
33 432 treatment. The Principal Investigator will ensure that follow-up of the participant is appropriate to the nature  
34  
35 433 of any event, and that it continues until resolution.  
36

37  
38 434  
39  
40 435 Throughout the trial the study doctor will monitor participants for pregnancy. It is not currently included  
41  
42 436 in the protocol, but the trial Standard Operating Procedures manual explains that the study doctor will be  
43  
44 437 giving relevant contraception advice to the participants based on the current investigational product  
45  
46 438 information.  
47

48  
49 439  
50  
51 440 According to the investigational product information, participants will be advised to not drive a car,  
52  
53 441 operate machinery, or do other dangerous activities until they know how the investigational product  
54  
55 442 affects them, as it may induce drowsiness in some subjects.  
56

57  
58 443  
59  
60 444 **Sample Size**

1  
2 445 Sample size was determined based on a previous study of circadian changes in response to Agomelatine  
3  
4 446 [30] where a correlation coefficient of 0.54 was found for the key outcome of interest, namely correlation  
5  
6 447 between change in DLMO and change in depressive symptoms. We conservatively estimated that the  
7  
8 448 correlation coefficient for Brexpiprazole would be smaller, around 0.35 (i.e., a medium effect size), as the  
9  
10  
11 449 effects on the circadian system may be less direct. Assuming an alpha of 0.05 and 80% power for a one-  
12  
13 450 tailed correlation analysis, a sample size of 49 would be required to detect this effect.  
14

15 451

### 17 452 **Data Analysis/Statistical methods**

19  
20 453 Correlations will be performed between change scores (i.e., Visit 2 score minus Visit 1 score) for sleep and  
21  
22 454 circadian measures, and change scores for depressive symptoms. The intention-to-treat principle will be used  
23  
24 455 for missing data, with last observations carried forward. Prior to analysis, scatter plots and box plots with  
25  
26 456 outlier and normality statistics will be generated for all variables to identify outliers and issues with variable  
27  
28  
29 457 distribution. Extreme outliers (beyond three z scores in either direction) will be checked against source data  
30  
31 458 and testing notes to verify whether they are the result of an error in data entry or a specific issue during  
32  
33 459 testing (e.g., equipment failure), and any errors rectified. If they are not the result of an error in data entry,  
34  
35 460 outliers will be curtailed. Pearson's or Spearman's correlations will be selected to perform analyses based on  
36  
37  
38 461 normative or non-normative data distribution; a significance level will be set at  $\alpha=0.05$ . Correlations will be  
39  
40 462 performed between other change scores to assess secondary and tertiary endpoints using the same  
41  
42 463 methodology. Further tertiary endpoints will be assessed by partial correlations comparing categorical  
43  
44 464 variables.  
45

### 47 465 48 49 466 **Patient and public involvement**

50  
51 467 Clinical professionals working with young people with mental health issues were invited to comment on the  
52  
53 468 study design and procedures. Research findings will be disseminated into the scientific, clinical, and wider  
54  
55 469 community.  
56  
57  
58 470  
59  
60

1  
2 471 **Ethics and dissemination**  
3  
4 472 This trial has been approved by the Human Research Ethics Committee of the Sydney Local Health District  
5  
6 473 (X19-0417 and 2019/ETH12986, Protocol Version v 1-3, dated 25.02.2021). The study will be conducted in  
7  
8 474 compliance with all stipulations of the protocol, the conditions of ethics committee approval, the NHMRC  
9  
10 National Statement on Ethical Conduct in Human Research and the Good Clinical Practice guidelines.  
11 475  
12

13 476  
14  
15 477 The results of this study will be disseminated as widely as possible into the scientific and broader community.  
16  
17 478 This will include publication in peer-reviewed journals, scholarly book chapters, presentation at conferences  
18  
19 and publication in conference proceedings. Publications arising from this project will be deposited into an  
20 479  
21 open access institutional repository, where possible. Results will also be disseminated into the wider  
22 480  
23 community in a format appropriate for a lay audience, through links including the BMC website and social  
24 481  
25 media, as well as newsletters.  
26 482  
27  
28

29 483  
30  
31 484 **Figure 1. Study flow chart**

32  
33 Legend: This figure illustrates the study design and participant timeline from referral to the last follow up  
34 485  
35 visit, including withdrawal and safety procedures.  
36 486  
37

38 487  
39  
40 488 **TRIAL STATUS**

41  
42 Protocol ID: BMC-YMH-005-2018, Version: v 1-3, dated 25/02/2021.  
43 489  
44

45 490 The trial has not commenced recruitment.  
46  
47 491  
48

49 492 **LIST OF ABBREVIATIONS**  
50  
51

| ABBREVIATION | TERM                                                   |
|--------------|--------------------------------------------------------|
| AE           | Adverse Event                                          |
| AIMS         | Abnormal Involuntary Movement Scale                    |
| ANZCTR       | Australian New Zealand Clinical Trials Registry        |
| ASRM         | Altman Self-Rating Mania scale                         |
| AUDIT-C      | Alcohol Use Disorders Identification Test- Consumption |
| BMC          | Brain and Mind Centre                                  |

60

|            |                                                                                      |
|------------|--------------------------------------------------------------------------------------|
| BMI        | Body Mass Index                                                                      |
| B-NSSI-AT  | Brief Non-Suicidal Self-Injury Assessment Tool                                       |
| BPRS       | Brief Psychiatric Rating Scale                                                       |
| CAARMS     | Comprehensive Assessment of At-Risk Mental States                                    |
| CGI        | Clinical Global Impressions scale                                                    |
| CRP        | C-Reactive Protein                                                                   |
| C-SSRS     | Columbia- Suicide Severity Rating Scale                                              |
| DLMO       | Dim Light Melatonin Onset                                                            |
| DSM-5      | Diagnostic and Statistical Manual for Mental Disorders, 5th Edition                  |
| EDE        | Eating Disorder Examination                                                          |
| EPS        | Extrapyramidal Symptoms                                                              |
| ESS        | Epworth Sleepiness Scale                                                             |
| HDL        | High Density Lipoprotein                                                             |
| HOMA2-IR   | Homeostasis Model of Insulin Resistance                                              |
| HREC       | Human Research Ethics Committee                                                      |
| IL         | Interleukin                                                                          |
| IP         | Investigational Product                                                              |
| IPAQ       | International Physical Activity Questionnaire                                        |
| ISI        | Insomnia Severity Index                                                              |
| LDL        | Low Density Lipoprotein                                                              |
| MADRS      | Montgomery-Åsberg Depression Rating Scale                                            |
| MCTQ       | Munich Chronotype Questionnaire                                                      |
| MDD        | Major Depressive Disorder                                                            |
| MEQ        | Morningness-Eveningness Questionnaire                                                |
| NEET       | Not in Education, Employment or Training                                             |
| OASIS      | Overall Anxiety Severity Impairment Scale                                            |
| PC-PTSD-5  | Primary Care Post-Traumatic Stress Disorder screen                                   |
| PIS        | Participant Information Statement                                                    |
| PQ-16      | Prodromal Questionnaire (brief version)                                              |
| PSQI       | Pittsburgh Sleep Quality Index                                                       |
| QIDS-CR    | Quick Inventory of Depressive Symptomatology (clinician-rated)                       |
| QIDS-SR    | Quick Inventory of Depressive Symptomatology (self-report)                           |
| SAS        | Simpson-Angus Scale                                                                  |
| SCID       | Structured Clinical Interview for DSM 5                                              |
| SIDAS      | Suicidal Ideation Attributes Scale                                                   |
| SNRI       | Selective Serotonin and Norepinephrine Reuptake Inhibitor                            |
| SOFAS      | Social and Occupational Functioning Assessment Scale                                 |
| SPAQ       | Seasonal Patterns Assessment Questionnaire                                           |
| SSRI       | Selective Serotonin Reuptake Inhibitor                                               |
| SSSS       | Schuster Social Support Scale                                                        |
| TAU        | Treatment As Usual                                                                   |
| TNF        | Tissue Necrosis Factor                                                               |
| WHO-ASSIST | World Health Organisation Alcohol, Smoking, and Substance Involvement Screening Test |
| WSAS       | Work and Social Adjustment Scale                                                     |
| YMRS       | Young Mania Rating Scale                                                             |

#### AUTHOR CONTRIBUTIONS

1  
2 495 JSC and IBH conceived the study, led the proposal and protocol development. JSC wrote the trial protocol.  
3  
4 496 AG drafted the first version of the manuscript. NZ drafted the final version of the manuscript with input from  
5  
6 497 other authors. JSC, AG, AN, NZ, YJSS, CW, CR, JJC, CMM, FML, DK and EMS were all involved with modifications  
7  
8  
9 498 to the design of the study and with drafting of this paper. All authors have read and approved the final  
10  
11 499 manuscript.

## 14 500 **FUNDING**

17 501 This investigator-initiated trial with Lundbeck compound is supported by Lundbeck Australia Pty Ltd.  
18  
19 502 (award/grant number is not applicable).

## 24 504 **ACKNOWLEDGEMENTS**

26 505 JJC is supported by a Breakthrough Mental Health Research Foundation Fellowship and a NHMRC Emerging  
27  
28 506 Leadership Fellowship.

## 33 508 **COMPETING INTERESTS**

35 509 Professor Ian Hickie is the Co-Director, Health and Policy at the Brain and Mind Centre (BMC) University of  
36  
37 510 Sydney, Australia. The BMC operates an early-intervention youth services at Camperdown under contract to  
38  
39  
40 511 headspace. Professor Hickie has previously led community-based and pharmaceutical industry-supported  
41  
42 512 (Wyeth, Eli Lilly, Servier, Pfizer, AstraZeneca) projects focused on the identification and better management  
43  
44 513 of anxiety and depression. He is the Chief Scientific Advisor to, and a 5% equity shareholder in, InnoWell Pty  
45  
46 514 Ltd. InnoWell was formed by the University of Sydney (45% equity) and PwC (Australia; 45% equity) to deliver  
47  
48  
49 515 the \$30 M Australian Government-funded Project Synergy (2017-20) and to lead transformation of mental  
50  
51 516 health services internationally through the use of innovative technologies.

55 518 Associate Professor Elizabeth M Scott is the Medical Director, Young Adult Mental Health Unit, St Vincent's  
56  
57  
58 519 Hospital Darlinghurst, Discipline Leader of Adult Mental Health, School of Medicine, University of Notre  
59  
60 520 Dame, Research Affiliate, The University of Sydney and Consultant Psychiatrist. She has received honoraria

1  
2 521 for educational seminars related to the clinical management of depressive disorders supported by Servier  
3  
4 522 and Eli-Lilly pharmaceuticals. She has participated in a national advisory board for the antidepressant  
5  
6 523 compound Pristiq, manufactured by Pfizer. She was the National Coordinator of an antidepressant trial  
7  
8  
9 524 sponsored by Servier.

10  
11 525  
12 526 Other authors declare no competing interests.  
13

14 527  
15  
16 528 **DATA AVAILABILITY STATEMENT**

17  
18  
19 529 As this trial has not commenced recruitment, no data is available at present. Once the dataset is generated,  
20  
21 530 de-identified data may be made available from the corresponding author upon reasonable request.  
22

23 531  
24  
25 532  
26 533 **REFERENCES**  
27 534

- 28 535 1. Kessler, R.C., et al., *The global burden of mental disorders: An update from the WHO World*  
29 536 *Mental Health (WMH) Surveys*. *Epidemiologia e Psichiatria Sociale*, 2011. **18**(01): p. 23-33.
- 30 537 2. Gore, F.M., et al., *Global burden of disease in young people aged 10–24 years: A systematic*  
31 538 *analysis*. *The Lancet*, 2011. **377**(9783): p. 2093-2102.
- 32 539 3. Kennard, B.D., et al., *Remission and recovery in the Treatment for Adolescents with Depression*  
33 540 *Study (TADS): acute and long-term outcomes*. *Journal of the American Academy of Child &*  
34 541 *Adolescent Psychiatry*, 2009. **48**(2): p. 186-195.
- 35 542 4. March, J., et al., *Fluoxetine, cognitive-behavioral therapy, and their combination for adolescents*  
36 543 *with depression: Treatment for Adolescents With Depression Study (TADS) randomized*  
37 544 *controlled trial*. *Jama*, 2004. **292**(7): p. 807-820.
- 38 545 5. Rush, A.J., et al., *Acute and Longer-Term Outcomes in Depressed Outpatients Requiring One or*  
39 546 *Several Treatment Steps: A STAR\*D Report*. *American Journal of Psychiatry*, 2006. **163**: p. 1905-  
40 547 1917.
- 41 548 6. Murphy, S.E., et al., *The knowns and unknowns of SSRI treatment in young people with*  
42 549 *depression and anxiety: efficacy, predictors, and mechanisms of action*. *The Lancet Psychiatry*,  
43 550 2021. **8**(9): p. 824-835.
- 44 551 7. Cuijpers, P., et al., *Psychotherapy for depression across different age groups: a systematic review*  
45 552 *and meta-analysis*. *JAMA psychiatry*, 2020. **77**(7): p. 694-702.
- 46 553 8. Wolpert, M., et al., *Strategies not accompanied by a mental health professional to address anxiety*  
47 554 *and depression in children and young people: a scoping review of range and a systematic review*  
48 555 *of effectiveness*. *The Lancet Psychiatry*, 2019. **6**(1): p. 46-60.
- 49 556 9. Eckshtain, D., et al., *Meta-analysis: 13-year follow-up of psychotherapy effects on youth*  
50 557 *depression*. *Journal of the American Academy of Child & Adolescent Psychiatry*, 2020. **59**(1): p.  
51 558 45-63.
- 52 559 10. Bear, H.A., et al., *Systematic review and meta-analysis: outcomes of routine specialist mental*  
53 560 *health care for young people with depression and/or anxiety*. *Journal of the American Academy*  
54 561 *of Child & Adolescent Psychiatry*, 2020. **59**(7): p. 810-841.



- 1
- 2 562 11. Zhou, X., et al., *Comparative efficacy, acceptability, and tolerability of augmentation agents in*  
3 563 *treatment-resistant depression: systematic review and network meta-analysis.* J Clin Psychiatry,  
4 564 2015. **76**(4): p. e487-98.
- 5 565 12. Fornaro, M., et al., *Brexipiprazole for treatment-resistant major depressive disorder.* Expert opinion  
6 566 on pharmacotherapy, 2019. **20**(16): p. 1925-1933.
- 7 567 13. Benca, R.M., et al., *Sleep and psychiatric disorders: A meta-analysis.* Archives of General  
8 568 Psychiatry, 1992. **49**(8): p. 651-668.
- 9 569 14. van Mill, J.G., et al., *Insomnia and sleep duration in a large cohort of patients with major depressive*  
10 570 *disorder and anxiety disorders.* Journal of Clinical Psychiatry, 2010. **71**(3): p. 239-246.
- 11 571 15. Baglioni, C., et al., *Insomnia as a predictor of depression: A meta-analytic evaluation of*  
12 572 *longitudinal epidemiological studies.* Journal of Affective Disorders, 2011. **135**(1-3): p. 10-19.
- 13 573 16. Liu, X., et al., *Insomnia and hypersomnia associated with depressive phenomenology and*  
14 574 *comorbidity in childhood depression.* Sleep, 2007. **30**(1): p. 83-90.
- 15 575 17. Geoffroy, P.A., et al., *Insomnia and hypersomnia in major depressive episode: prevalence,*  
16 576 *sociodemographic characteristics and psychiatric comorbidity in a population-based study.* Journal  
17 577 of Affective Disorders, 2018. **226**: p. 132-141.
- 18 578 18. Merikangas, K.R., et al., *Real-time mobile monitoring of the dynamic associations among motor*  
19 579 *activity, energy, mood, and sleep in adults with bipolar disorder.* JAMA psychiatry, 2019. **76**(2): p.  
20 580 190-198.
- 21 581 19. Difrancesco, S., et al., *Sleep, circadian rhythm, and physical activity patterns in depressive and*  
22 582 *anxiety disorders: A 2-week ambulatory assessment study.* Depression and anxiety, 2019. **36**(10):  
23 583 p. 975-986.
- 24 584 20. Germain, A. and D.J. Kupfer, *Circadian rhythm disturbances in depression.* Human  
25 585 Psychopharmacology, 2008. **23**(7): p. 571-585.
- 26 586 21. Lanfumey, L., R. Mongeau, and M. Hamon, *Biological rhythms and melatonin in mood disorders*  
27 587 *and their treatments.* Pharmacology and Therapeutics, 2013. **138**(2): p. 176-184.
- 28 588 22. Krystal, A.D., et al., *Chronobiologic parameter changes in patients with major depressive disorder*  
29 589 *and sleep disturbance treated with adjunctive brexpiprazole: an open-label, flexible-dose,*  
30 590 *exploratory substudy.* Journal of Affective Disorders, 2020.
- 31 591 23. Ko, C.H. and J.S. Takahashi, *Molecular components of the mammalian circadian clock.* Human  
32 592 molecular genetics, 2006. **15**(suppl\_2): p. R271-R277.
- 33 593 24. Logan, R.W. and C.A. McClung, *Rhythms of life: circadian disruption and brain disorders across*  
34 594 *the lifespan.* Nature Reviews Neuroscience, 2019. **20**(1): p. 49-65.
- 35 595 25. Carpenter, J.S., R. Robillard, and I.B. Hickie, *Variations in the sleep-wake cycle from childhood*  
36 596 *to adulthood: Chronobiological perspectives.* ChronoPhysiology and Therapy, 2015. **5**: p. 37-49.
- 37 597 26. Robillard, R., et al., *Delayed sleep phase in young people with unipolar or bipolar affective*  
38 598 *disorders.* Journal of Affective Disorders, 2013. **145**(2): p. 260-263.
- 39 599 27. Robillard, R., et al., *Circadian rhythms and psychiatric profiles in young adults with unipolar*  
40 600 *depressive disorders.* Transl Psychiatry, 2018. **8**: p. 213.
- 41 601 28. Crowley, S.J., C. Acebo, and M.A. Carskadon, *Sleep, circadian rhythms, and delayed phase in*  
42 602 *adolescence.* Sleep medicine, 2007. **8**(6): p. 602-612.
- 43 603 29. Roenneberg, T., et al., *A marker for the end of adolescence.* Current biology, 2004. **14**(24): p.  
44 604 R1038-R1039.
- 45 605 30. Robillard, R., et al., *Parallel Changes in Mood and Melatonin Rhythm Following an Adjunctive*  
46 606 *Multimodal Chronobiological Intervention With Agomelatine in People With Depression: A*  
47 607 *Proof of Concept Open Label Study.* Front Psychiatry, 2018. **9**: p. 624.
- 48 608 31. Benedetti, F., et al., *Phase advance is an actimetric correlate of antidepressant response to sleep*  
49 609 *deprivation and light therapy in bipolar depression.* Chronobiology International, 2007. **24**(5): p.  
50 610 921-937.

- 1  
2 611 32. Hobart, M., et al., *A Randomized, Placebo-Controlled Study of the Efficacy and Safety of Fixed-Dose Brexpiprazole 2 mg/d as Adjunctive Treatment of Adults With Major Depressive Disorder*. J Clin Psychiatry, 2018. **79**(4).
- 3 612  
4 613  
5 614 33. Bauer, M., et al., *A randomised, placebo-controlled 24-week study evaluating adjunctive brexpiprazole in patients with major depressive disorder*. Acta Neuropsychiatr, 2018: p. 1-9.
- 7 615  
8 616 34. Thase, M.E., et al., *Adjunctive brexpiprazole 1 and 3 mg for patients with major depressive disorder following inadequate response to antidepressants: a phase 3, randomized, double-blind study*. J Clin Psychiatry, 2015. **76**(9): p. 1232-40.
- 9 617  
10 618  
11 619 35. Thase, M.E., et al., *Efficacy and safety of adjunctive brexpiprazole 2 mg in major depressive disorder: a phase 3, randomized, placebo-controlled study in patients with inadequate response to antidepressants*. J Clin Psychiatry, 2015. **76**(9): p. 1224-31.
- 13 620  
14 621  
15 622 36. Yoon, S., et al., *Adjunctive Brexpiprazole as a Novel Effective Strategy for Treating Major Depressive Disorder: A Systematic Review and Meta-Analysis*. Journal of Clinical Psychopharmacology, 2017. **37**: p. 46-53.
- 16 623  
17 624  
18 625 37. Citrome, L., T.B. Stensbol, and K. Maeda, *The preclinical profile of brexpiprazole: what is its clinical relevance for the treatment of psychiatric disorders?* Expert Rev Neurother, 2015. **15**(10): p. 1219-29.
- 20 626  
21 627  
22 628 38. Beyer, J.L. and R.H. Weisler, *Adjunctive brexpiprazole for the treatment of major depressive disorder*. Expert Opin Pharmacother, 2016. **17**(17): p. 2331-2339.
- 24 629  
25 630 39. Krystal, A.D., et al., *Effects of Adjunctive Brexpiprazole on Sleep Disturbances in Patients With Major Depressive Disorder: An Open-Label, Flexible-Dose, Exploratory Study*. Prim Care Companion CNS Disord, 2016. **18**(5).
- 26 631  
27 632  
28 633 40. Pillai, V., D.A. Kalmbach, and J.A. Ciesla, *A meta-analysis of electroencephalographic sleep in depression: evidence for genetic biomarkers*. Biological psychiatry, 2011. **70**(10): p. 912-919.
- 30 634  
31 635 41. Palagini, L., et al., *REM sleep dysregulation in depression: state of the art*. Sleep medicine reviews, 2013. **17**(5): p. 377-390.
- 32 636  
33 637 42. Wang, Y.-Q., et al., *The neurobiological mechanisms and treatments of REM sleep disturbances in depression*. Current neuropharmacology, 2015. **13**(4): p. 543-553.
- 34 638  
35 639 43. Zhang, Y., et al., *Polysomnographically measured sleep changes in idiopathic REM sleep behavior disorder: A systematic review and meta-analysis*. Sleep Medicine Reviews, 2020. **54**: p. 101362.
- 37 640  
38 641 44. Hickie, I.B., et al., *Right care, first time: a highly personalised and measurement-based care model to manage youth mental health*. Medical Journal of Australia, 2019. **211**(S9): p. S3-S46.
- 39 642  
40 643 45. American Psychiatric Association, *Diagnostic and statistical manual of mental disorders*. 5th ed. 2013, Arlington, VA: American Psychiatric Pub.
- 42 644  
43 645 46. Rush, A.J., et al., *The 16-Item quick inventory of depressive symptomatology (QIDS), clinician rating (QIDS-C), and self-report (QIDS-SR): a psychometric evaluation in patients with chronic major depression*. Biological Psychiatry, 2003. **54**(5): p. 573-583.
- 44 646  
45 647  
46 648 47. Yung, A.R., et al., *Mapping the onset of psychosis: the Comprehensive Assessment of At-Risk Mental States*. Australian and New Zealand Journal of Psychiatry, 2005. **39**: p. 964-971.
- 48 649  
49 650 48. WHO ASSIST Working Group, *The Alcohol, Smoking and Substance Involvement Screening Test (ASSIST): development, reliability and feasibility*. Addiction, 2002. **97**(9): p. 1183-94.
- 50 651  
51 652 49. Humeniuk, R., et al., *Validation of the Alcohol, Smoking And Substance Involvement Screening Test (ASSIST)*. Addiction, 2008. **103**(6): p. 1039-47.
- 52 653  
53 654 50. Fava, M., et al., *Adjunctive Brexpiprazole in Patients With Major Depressive Disorder and Irritability: An Exploratory Study*. J Clin Psychiatry, 2016. **77**(12): p. 1695-1701.
- 55 655  
56 656 51. Lingjaerde, O., et al., *The UKU side effect rating scale: a new comprehensive rating scale for psychotropic drugs and a cross-sectional study of side effects in neuroleptic-treated patients*. Acta Psychiatrica Scandinavica, 1987. **76**.
- 57 657  
58 658  
59 658  
60



- 1  
2 659 52. Guy, W.A., *Abnormal Involuntary Movement Scale (AIMS)*, in *ECDEU Assessment Manual for*  
3 660 *Psychopharmacology*. 1976, U.S. Department of Health Education and Welfare: Washington, DC  
4 661 p. 534-537.
- 5 662 53. Simpson, G.M. and J.W.S. Angus, *A rating scale for extrapyramidal side effects*. *Acta Psychiatrica*  
6 663 *Scandinavica*, 1970. **45**: p. 11-19.
- 7 664 54. Hickie, I.B., et al., *Applying clinical staging to young people who present for mental health care*.  
8 665 *Early Intervention in Psychiatry*, 2013. **7**(1): p. 31-43.
- 9 666 55. McGorry, P.D., et al., *Clinical staging of psychiatric disorders: a heuristic framework for choosing*  
10 667 *earlier, safer and more effective interventions*. *Aust N Z J Psychiatry*, 2006. **40**(8): p. 616-22.
- 11 668 56. Scott, J., et al., *Clinical staging in psychiatry: a cross-cutting model of diagnosis with heuristic and*  
12 669 *practical value*. *British Journal of Psychiatry*, 2013. **202**(4): p. 243-245.
- 13 670 57. Hickie, I.B., J. Scott, and P.D. McGorry, *Clinical staging for mental disorders: a new development*  
14 671 *in diagnostic practice in mental health*. *Med J Aust*, 2013. **198**(9): p. 461-2.
- 15 672 58. Hickie, I.B., et al., *Evaluating differential developmental trajectories to adolescent-onset mood and*  
16 673 *psychotic disorders*. *BMC Psychiatry*, 2013. **13**: p. 303.
- 17 674 59. Crouse, J.J., et al., *Transdiagnostic neurocognitive subgroups and functional course in young*  
18 675 *people with emerging mental disorders: a cohort study*. *BJPsych Open*, 2020. **6**(2).
- 19 676 60. Carpenter, J.S., et al., *Cohort profile: the Brain and Mind Centre Optymise cohort: tracking*  
20 677 *multidimensional outcomes in young people presenting for mental healthcare*. *BMJ open*, 2020.  
21 678 **10**(3): p. e030985.
- 22 679 61. Scott, E.M., et al., *Early intervention, prevention, and prediction in mood disorders: Tracking*  
23 680 *multidimensional outcomes in young people presenting for mental health care*, in *Personalized*  
24 681 *Psychiatry*. 2020, Elsevier. p. 39-62.
- 25 682 62. Montgomery, S.A. and S.A. Asberg, *A new depression scale designed to be sensitive to change*.  
26 683 *British Journal of Psychiatry*, 1979. **134**: p. 382-389.
- 27 684 63. Young, R., et al., *A rating scale for mania: reliability, validity and sensitivity*. *The British Journal*  
28 685 *of Psychiatry*, 1978. **133**(5).
- 29 686 64. Overall, J.E. and D.R. Gorham, *The brief psychiatric rating scale*. *Psychological Reports*, 1962. **10**:  
30 687 p. 799-812.
- 31 688 65. Goldman, H.H., A.E. Skodol, and T.R. Lave, *Revising axis V for DSM-IV: A review of measures of*  
32 689 *social functioning*. *American Journal of Psychiatry*, 1992. **149**(9): p. 1148-1156.
- 33 690 66. Busner, J. and S.D. Targum, *The clinical global impressions scale: applying a research tool in*  
34 691 *clinical practice*. *Psychiatry (Edgemont)*, 2007. **4**(7): p. 28.
- 35 692 67. Hickie, I.B., et al., *Evaluating differential developmental trajectories to adolescent-onset mood and*  
36 693 *psychotic disorders*. *BMC psychiatry*, 2013. **13**(1): p. 303.
- 37 694 68. Hickie, I.B., et al., *Right care, first time: a highly personalised and measurement-based care model*  
38 695 *to manage youth mental health*. *Medical Journal of Australia*, 2019. **211**: p. S3-S46.
- 39 696 69. Crouse, J.J., et al., *Circadian rhythm sleep-wake disturbances and depression in young people:*  
40 697 *implications for prevention and early intervention*. *The Lancet Psychiatry*, 2021. **8**(9): p. 813-823.
- 41 698 70. Craig, C.L., et al., *International physical activity questionnaire: 12-country reliability and validity*.  
42 699 *Med Sci Sports Exerc*, 2003. **35**(8): p. 1381-95.
- 43 700 71. Booth, M., *Assessment of physical activity: an international perspective*. *Res Q Exerc Sport*, 2000.  
44 701 **71**(2 Suppl): p. S114-20.
- 45 702 72. Bush, K., et al., *The AUDIT alcohol consumption questions (AUDIT-C): an effective brief*  
46 703 *screening test for problem drinking*. *Ambulatory Care Quality Improvement Project (ACQUIP).*  
47 704 *Alcohol Use Disorders Identification Test*. *Arch Intern Med*, 1998. **158**(16): p. 1789-95.
- 48 705 73. van Spijker, B.A., et al., *The suicidal ideation attributes scale (SIDAS): Community-based*  
49 706 *validation study of a new scale for the measurement of suicidal ideation*. *Suicide Life Threat Behav*,  
50 707 2014. **44**(4): p. 408-19.

1

- 2 708 74. Posner, K., et al., *The Columbia-Suicide Severity Rating Scale: initial validity and internal*  
3 709 *consistency findings from three multisite studies with adolescents and adults.* Am J Psychiatry,  
4 710 2011. **168**(12): p. 1266-77.
- 5 711 75. Whitlock, J., D. Exner-Cortens, and A. Purington, *Assessment of nonsuicidal self-injury:*  
6 712 *development and initial validation of the Non-Suicidal Self-Injury-Assessment Tool (NSSI-AT).*  
7 713 Psychol Assess, 2014. **26**(3): p. 935-46.
- 8 714 76. Rush, A.J., et al., *The 16-Item Quick Inventory of Depressive Symptomatology (QIDS), clinician*  
9 715 *rating (QIDS-C), and self-report (QIDS-SR): a psychometric evaluation in patients with chronic*  
10 716 *major depression.* Biol Psychiatry, 2003. **54**(5): p. 573-83.
- 11 717 77. Norman, S.B., et al., *Development and validation of an Overall Anxiety Severity And Impairment*  
12 718 *Scale (OASIS).* Depress Anxiety, 2006. **23**(4): p. 245-9.
- 13 719 78. Campbell-Sills, L., et al., *Validation of a brief measure of anxiety-related severity and impairment:*  
14 720 *the Overall Anxiety Severity and Impairment Scale (OASIS).* J Affect Disord, 2009. **112**(1-3): p.  
15 721 92-101.
- 16 722 79. Prins, A., et al., *The Primary Care PTSD Screen for DSM-5 (PC-PTSD-5): Development and*  
17 723 *Evaluation Within a Veteran Primary Care Sample.* J Gen Intern Med, 2016. **31**(10): p. 1206-11.
- 18 724 80. Ising, H.K., et al., *The validity of the 16-item version of the Prodromal Questionnaire (PQ-16) to*  
19 725 *screen for ultra high risk of developing psychosis in the general help-seeking population.*  
20 726 Schizophr Bull, 2012. **38**(6): p. 1288-96.
- 21 727 81. Hay, P.J., et al., *Eating disorder behaviors are increasing: findings from two sequential community*  
22 728 *surveys in South Australia.* PLoS One, 2008. **3**(2): p. e1541.
- 23 729 82. Mitchison, D., et al., *The changing demographic profile of eating disorder behaviors in the*  
24 730 *community.* BMC Public Health, 2014. **14**: p. 943.
- 25 731 83. Mundt, J.C., et al., *The Work and Social Adjustment Scale: a simple measure of impairment in*  
26 732 *functioning.* Br J Psychiatry, 2002. **180**: p. 461-4.
- 27 733 84. Schuster, T.L., R.C. Kessler, and R.H. Aseltine, Jr., *Supportive interactions, negative interactions,*  
28 734 *and depressed mood.* Am J Community Psychol, 1990. **18**(3): p. 423-38.
- 29 735 85. Buysse, D.J., et al., *The Pittsburgh Sleep Quality Index: A new instrument for psychiatric practice*  
30 736 *and research* Psychiatry Research, 1988. **28**: p. 193-213.
- 31 737 86. Johns, M.W., *A new method for measuring daytime sleepiness: The Epworth sleepiness scale.*  
32 738 Sleep, 1991. **14**(6): p. 540-545.
- 33 739 87. Bastien, C.H., A. Vallieres, and C.M. Morin, *Validation of the Insomnia Severity Index as an*  
34 740 *outcome measure for insomnia research.* Sleep Medicine, 2001. **2**: p. 297-307.
- 35 741 88. Horne, J.A. and O. Ostberg, *A self-assessment questionnaire to determine morningness-*  
36 742 *eveningness in human circadian rhythms.* International Journal of Chronobiology, 1975. **4**(2): p.  
37 743 97-110.
- 38 744 89. Rosenthal, N.E., et al., *Seasonal affective disorder and its relevance for the understanding and*  
39 745 *treatment of bulimia.*, in *The Psychobiology of Bulimia.*, J.I. Hudson and H.G. Pope, Editors. 1987,  
40 746 American Psychiatric Press: Washington, DC. p. 205-228.
- 41 747 90. Schaefer, C.A., et al., *Establishing and evaluating wrist cutpoints for the GENEActiv accelerometer*  
42 748 *in youth.* Med Sci Sports Exerc, 2014. **46**(4): p. 826-33.
- 43 749 91. Hildebrand, M., et al., *Age group comparability of raw accelerometer output from wrist- and hip-*  
44 750 *worn monitors.* Med Sci Sports Exerc, 2014. **46**(9): p. 1816-24.
- 45 751 92. Esliger, D.W., et al., *Validation of the GENEActiv Accelerometer.* Med Sci Sports Exerc, 2011. **43**(6):  
46 752 p. 1085-93.
- 47 753 93. van Hees, V.T., et al., *Separating movement and gravity components in an acceleration signal and*  
48 754 *implications for the assessment of human daily physical activity.* PLoS One, 2013. **8**(4): p. e61691.
- 49 755 94. te Lindert, B.H. and E.J. Van Someren, *Sleep estimates using microelectromechanical systems*  
50 756 *(MEMS).* Sleep, 2013. **36**(5): p. 781-789.

- 1  
2 757 95. van Hees, V.T., et al., *A Novel, Open Access Method to Assess Sleep Duration Using a Wrist-Worn*  
3 758 *Accelerometer*. PLoS One, 2015. **10**(11): p. e0142533.
- 4 759 96. Stone, J.E., et al., *Accuracy of the GENEActiv Device for Measuring Light Exposure in Sleep and*  
5 760 *Circadian Research*. Clocks & Sleep, 2020. **2**(2): p. 143-152.
- 7 761 97. Pavey, T.G., et al., *The validity of the GENEActiv wrist-worn accelerometer for measuring adult*  
8 762 *sedentary time in free living*. Journal of science and medicine in sport, 2016. **19**(5): p. 395-399.
- 9 763 98. Lewy, A.J. and R.L. Sack, *The dim light melatonin onset as a marker for circadian phase position*.  
10 764 *Chronobiology International*, 1989. **6**(1): p. 93-102.
- 12 765 99. de Almeida, E.A., et al., *Measurement of melatonin in body fluids: standards, protocols and*  
13 766 *procedures*. Childs Nerv Syst, 2011. **27**(6): p. 879-91.
- 14 767 100. Voultsios, A., D.J. Kennaway, and D. Dawson, *Salivary melatonin as a circadian phase marker:*  
15 768 *Validation and comparison to plasma melatonin*. Journal of Biological Rhythms, 1997. **12**(5): p.  
16 769 457-466.
- 18 770 101. Pandi-Perumal, S.R., et al., *Dim Light Melatonin Onset (DLMO): A tool for the analysis of*  
19 771 *circadian phase in human sleep and chronobiological disorders*. Progress in Neuro-  
20 772 *Psychopharmacology and Biological Psychiatry*, 2007. **31**(1): p. 1-11.
- 21 773 102. Wallace, T.M., J.C. Levy, and D.R. Matthews, *Use and Abuse of HOMA Modeling*. Diabetes Care,  
22 774 2004. **27**(6): p. 1487-1495.
- 24 775 103. Hill, N., J. Levy, and D. Matthews, *Expansion of the Homeostasis Model Assessment of  $\beta$ -Cell*  
25 776 *Function and Insulin Resistance to Enable Clinical Trial Outcome Modeling Through the*  
26 777 *Interactive Adjustment of Physiology and Treatment Effects: iHOMA2*. Diabetes Care, 2013. **36**:  
27 778 p. 2324 - 2330.
- 29 779 104. Lepola, U., et al., *Adjunctive brexpiprazole for elderly patients with major depressive disorder: An*  
30 780 *open-label, long-term safety and tolerability study*. International Journal of Geriatric Psychiatry,  
31 781 2018. **33**(10): p. 1403-1410.
- 32 782 105. Hakala, M., et al., *O7. 5. Long-term safety and tolerability of brexpiprazole in patients with*  
33 783 *schizophrenia*. Schizophrenia Bulletin, 2018. **44**(suppl\_1): p. S94-S95.
- 35 784 106. Rohleder, C., et al., *Protocol: Youth Mental Health Tracker: protocol to establish a longitudinal*  
36 785 *cohort and research database for young people attending Australian mental health services*. BMJ  
37 786 *Open*, 2020. **10**(6).  
38  
39 787  
40  
41  
42  
43  
44  
45  
46  
47  
48  
49  
50  
51  
52  
53  
54  
55  
56  
57  
58  
59  
60

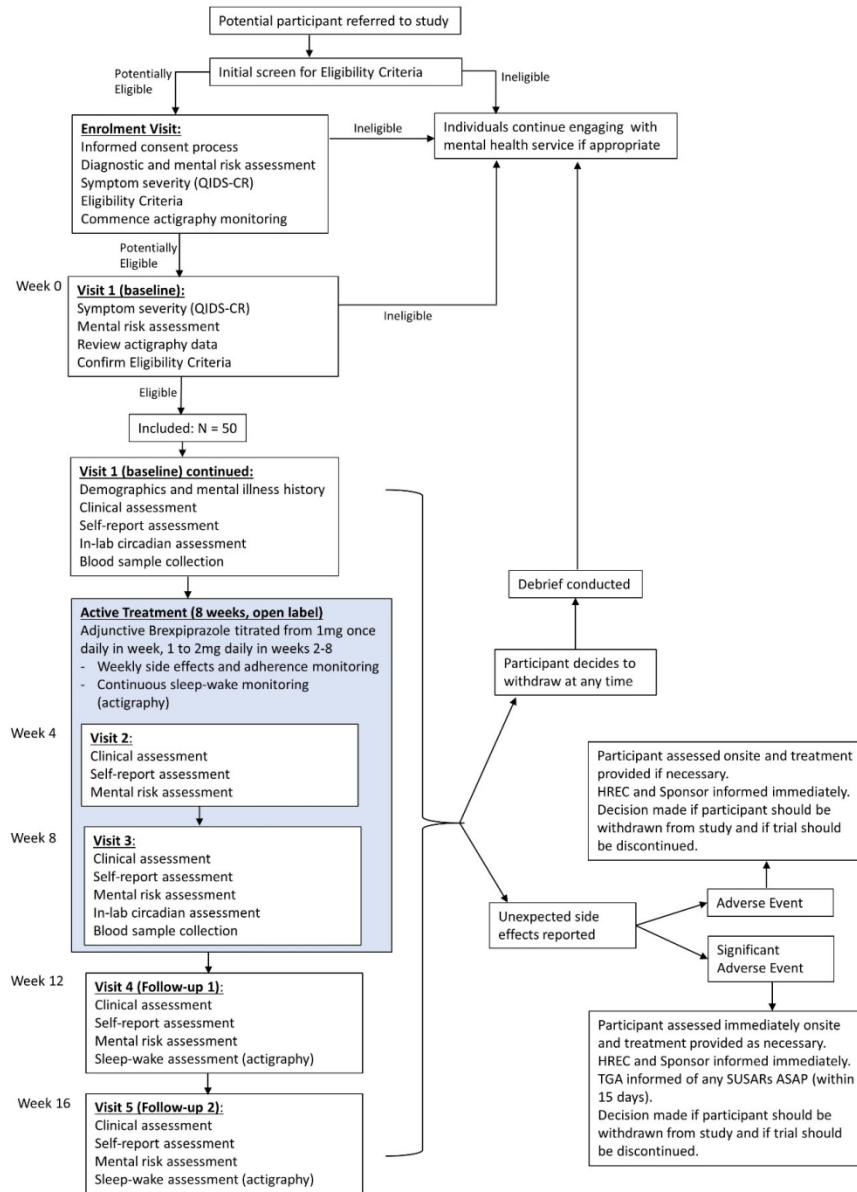

This figure illustrates the study design and participant timeline from referral to the last follow up visit, including withdrawal and safety procedures.

155x209mm (220 x 220 DPI)

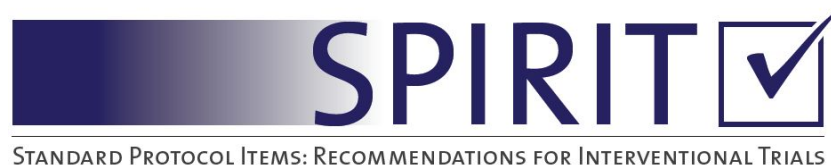

STANDARD PROTOCOL ITEMS: RECOMMENDATIONS FOR INTERVENTIONAL TRIALS

SPIRIT 2013 Checklist: Recommended items to address in a clinical trial protocol and related documents\*

| Section/item                      | Item No | Description                                                                                                                                                                                                                                                                              | Addressed on page number               |
|-----------------------------------|---------|------------------------------------------------------------------------------------------------------------------------------------------------------------------------------------------------------------------------------------------------------------------------------------------|----------------------------------------|
| <b>Administrative information</b> |         |                                                                                                                                                                                                                                                                                          |                                        |
| Title                             | 1       | Descriptive title identifying the study design, population, interventions, and, if applicable, trial acronym                                                                                                                                                                             | ___ 1 ___                              |
| Trial registration                | 2a      | Trial identifier and registry name. If not yet registered, name of intended registry                                                                                                                                                                                                     | ___ 3 ___                              |
|                                   | 2b      | All items from the World Health Organization Trial Registration Data Set                                                                                                                                                                                                                 | ___ 3 ___                              |
| Protocol version                  | 3       | Date and version identifier                                                                                                                                                                                                                                                              | ___ 2; 21 ___                          |
| Funding                           | 4       | Sources and types of financial, material, and other support                                                                                                                                                                                                                              | ___ 23 ___                             |
| Roles and responsibilities        | 5a      | Names, affiliations, and roles of protocol contributors                                                                                                                                                                                                                                  | ___ 1; 22-23 ___                       |
|                                   | 5b      | Name and contact information for the trial sponsor                                                                                                                                                                                                                                       | ___ 1 ___                              |
|                                   | 5c      | Role of study sponsor and funders, if any, in study design; collection, management, analysis, and interpretation of data; writing of the report; and the decision to submit the report for publication, including whether they will have ultimate authority over any of these activities | Please refer to the Protocol (page 37) |
|                                   | 5d      | Composition, roles, and responsibilities of the coordinating centre, steering committee, endpoint adjudication committee, data management team, and other individuals or groups overseeing the trial, if applicable (see Item 21a for data monitoring committee)                         | ___ N/A ___                            |



1 **Introduction**

2

3 Background and 6a Description of research question and justification for undertaking the trial, including summary of relevant \_\_\_ 4-5 \_\_\_  
 4 rationale studies (published and unpublished) examining benefits and harms for each intervention  
 5

6 6b Explanation for choice of comparators N/A as one arm  
 7 study  
 8

9 Objectives 7 Specific objectives or hypotheses \_\_\_ 5-6 \_\_\_  
 10

11 Trial design 8 Description of trial design including type of trial (eg, parallel group, crossover, factorial, single group),  
 12 allocation ratio, and framework (eg, superiority, equivalence, noninferiority, exploratory) \_\_\_ 6 \_\_\_  
 13  
 14

15 **Methods: Participants, interventions, and outcomes**

16

17 Study setting 9 Description of study settings (eg, community clinic, academic hospital) and list of countries where data will \_\_\_ 6 \_\_\_  
 18 be collected. Reference to where list of study sites can be obtained  
 19

20 Eligibility criteria 10 Inclusion and exclusion criteria for participants. If applicable, eligibility criteria for study centres and \_\_\_ 7 \_\_\_  
 21 individuals who will perform the interventions (eg, surgeons, psychotherapists)  
 22

23 Interventions 11a Interventions for each group with sufficient detail to allow replication, including how and when they will be \_\_\_ 7-9 \_\_\_  
 24 administered  
 25

26 11b Criteria for discontinuing or modifying allocated interventions for a given trial participant (eg, drug dose \_\_\_ 19 \_\_\_  
 27 change in response to harms, participant request, or improving/worsening disease)  
 28

29 11c Strategies to improve adherence to intervention protocols, and any procedures for monitoring adherence \_\_\_ 9; 18-19 \_\_\_  
 30 (eg, drug tablet return, laboratory tests)  
 31

32 11d Relevant concomitant care and interventions that are permitted or prohibited during the trial \_\_\_ 7 \_\_\_  
 33

34 Outcomes 12 Primary, secondary, and other outcomes, including the specific measurement variable (eg, systolic blood  
 35 pressure), analysis metric (eg, change from baseline, final value, time to event), method of aggregation (eg, \_\_\_ 9-12 \_\_\_  
 36 median, proportion), and time point for each outcome. Explanation of the clinical relevance of chosen  
 37 efficacy and harm outcomes is strongly recommended  
 38  
 39  
 40  
 41  
 42

|   |                      |    |                                                                                                                                                                                       |                                               |
|---|----------------------|----|---------------------------------------------------------------------------------------------------------------------------------------------------------------------------------------|-----------------------------------------------|
| 1 | Participant timeline | 13 | Time schedule of enrolment, interventions (including any run-ins and washouts), assessments, and visits for participants. A schematic diagram is highly recommended (see Figure)      | ____ 18 ____<br>Please also refer to Figure 1 |
| 2 |                      |    |                                                                                                                                                                                       |                                               |
| 3 |                      |    |                                                                                                                                                                                       |                                               |
| 4 |                      |    |                                                                                                                                                                                       |                                               |
| 5 | Sample size          | 14 | Estimated number of participants needed to achieve study objectives and how it was determined, including clinical and statistical assumptions supporting any sample size calculations | ____ 19-20 ____                               |
| 6 |                      |    |                                                                                                                                                                                       |                                               |
| 7 |                      |    |                                                                                                                                                                                       |                                               |
| 8 | Recruitment          | 15 | Strategies for achieving adequate participant enrolment to reach target sample size                                                                                                   | ____ 6 ____                                   |
| 9 |                      |    |                                                                                                                                                                                       |                                               |

11 **Methods: Assignment of interventions (for controlled trials)**

13 Allocation:

|    |                                  |     |                                                                                                                                                                                                                                                                                                                                                          |                               |
|----|----------------------------------|-----|----------------------------------------------------------------------------------------------------------------------------------------------------------------------------------------------------------------------------------------------------------------------------------------------------------------------------------------------------------|-------------------------------|
| 15 | Sequence generation              | 16a | Method of generating the allocation sequence (eg, computer-generated random numbers), and list of any factors for stratification. To reduce predictability of a random sequence, details of any planned restriction (eg, blocking) should be provided in a separate document that is unavailable to those who enrol participants or assign interventions | N/A as not a controlled trial |
| 16 |                                  |     |                                                                                                                                                                                                                                                                                                                                                          |                               |
| 17 |                                  |     |                                                                                                                                                                                                                                                                                                                                                          |                               |
| 18 |                                  |     |                                                                                                                                                                                                                                                                                                                                                          |                               |
| 19 |                                  |     |                                                                                                                                                                                                                                                                                                                                                          |                               |
| 20 | Allocation concealment mechanism | 16b | Mechanism of implementing the allocation sequence (eg, central telephone; sequentially numbered, opaque, sealed envelopes), describing any steps to conceal the sequence until interventions are assigned                                                                                                                                                | N/A as not a controlled trial |
| 21 |                                  |     |                                                                                                                                                                                                                                                                                                                                                          |                               |
| 22 |                                  |     |                                                                                                                                                                                                                                                                                                                                                          |                               |
| 23 |                                  |     |                                                                                                                                                                                                                                                                                                                                                          |                               |
| 24 |                                  |     |                                                                                                                                                                                                                                                                                                                                                          |                               |
| 25 | Implementation                   | 16c | Who will generate the allocation sequence, who will enrol participants, and who will assign participants to interventions                                                                                                                                                                                                                                | N/A as not a controlled trial |
| 26 |                                  |     |                                                                                                                                                                                                                                                                                                                                                          |                               |
| 27 |                                  |     |                                                                                                                                                                                                                                                                                                                                                          |                               |
| 28 | Blinding (masking)               | 17a | Who will be blinded after assignment to interventions (eg, trial participants, care providers, outcome assessors, data analysts), and how                                                                                                                                                                                                                | N/A as not a controlled trial |
| 29 |                                  |     |                                                                                                                                                                                                                                                                                                                                                          |                               |
| 30 |                                  |     |                                                                                                                                                                                                                                                                                                                                                          |                               |
| 31 |                                  | 17b | If blinded, circumstances under which unblinding is permissible, and procedure for revealing a participant's allocated intervention during the trial                                                                                                                                                                                                     | N/A as not a controlled trial |
| 32 |                                  |     |                                                                                                                                                                                                                                                                                                                                                          |                               |
| 33 |                                  |     |                                                                                                                                                                                                                                                                                                                                                          |                               |

35 **Methods: Data collection, management, and analysis**

|    |                         |     |                                                                                                                                                                                                                                                                                                                                                                                                              |                 |
|----|-------------------------|-----|--------------------------------------------------------------------------------------------------------------------------------------------------------------------------------------------------------------------------------------------------------------------------------------------------------------------------------------------------------------------------------------------------------------|-----------------|
| 37 | Data collection methods | 18a | Plans for assessment and collection of outcome, baseline, and other trial data, including any related processes to promote data quality (eg, duplicate measurements, training of assessors) and a description of study instruments (eg, questionnaires, laboratory tests) along with their reliability and validity, if known. Reference to where data collection forms can be found, if not in the protocol | ____ 12-17 ____ |
| 38 |                         |     |                                                                                                                                                                                                                                                                                                                                                                                                              |                 |
| 39 |                         |     |                                                                                                                                                                                                                                                                                                                                                                                                              |                 |
| 40 |                         |     |                                                                                                                                                                                                                                                                                                                                                                                                              |                 |
| 41 |                         |     |                                                                                                                                                                                                                                                                                                                                                                                                              |                 |
| 42 |                         |     |                                                                                                                                                                                                                                                                                                                                                                                                              |                 |

|    |                                 |     |                                                                                                                                                                                                                                                                                                                                       |                                                           |
|----|---------------------------------|-----|---------------------------------------------------------------------------------------------------------------------------------------------------------------------------------------------------------------------------------------------------------------------------------------------------------------------------------------|-----------------------------------------------------------|
| 1  |                                 | 18b | Plans to promote participant retention and complete follow-up, including list of any outcome data to be collected for participants who discontinue or deviate from intervention protocols                                                                                                                                             | Please refer to Figure 1                                  |
| 2  |                                 |     |                                                                                                                                                                                                                                                                                                                                       |                                                           |
| 3  |                                 |     |                                                                                                                                                                                                                                                                                                                                       |                                                           |
| 4  | Data management                 | 19  | Plans for data entry, coding, security, and storage, including any related processes to promote data quality (eg, double data entry; range checks for data values). Reference to where details of data management procedures can be found, if not in the protocol                                                                     | ____20____<br>Please also refer to the Protocol (page 35) |
| 5  |                                 |     |                                                                                                                                                                                                                                                                                                                                       |                                                           |
| 6  |                                 |     |                                                                                                                                                                                                                                                                                                                                       |                                                           |
| 7  |                                 |     |                                                                                                                                                                                                                                                                                                                                       |                                                           |
| 8  |                                 |     |                                                                                                                                                                                                                                                                                                                                       |                                                           |
| 9  | Statistical methods             | 20a | Statistical methods for analysing primary and secondary outcomes. Reference to where other details of the statistical analysis plan can be found, if not in the protocol                                                                                                                                                              | ____20____                                                |
| 10 |                                 |     |                                                                                                                                                                                                                                                                                                                                       |                                                           |
| 11 |                                 |     |                                                                                                                                                                                                                                                                                                                                       |                                                           |
| 12 |                                 |     |                                                                                                                                                                                                                                                                                                                                       |                                                           |
| 13 |                                 | 20b | Methods for any additional analyses (eg, subgroup and adjusted analyses)                                                                                                                                                                                                                                                              | ____N/A____                                               |
| 14 |                                 |     |                                                                                                                                                                                                                                                                                                                                       |                                                           |
| 15 |                                 | 20c | Definition of analysis population relating to protocol non-adherence (eg, as randomised analysis), and any statistical methods to handle missing data (eg, multiple imputation)                                                                                                                                                       | ____20____                                                |
| 16 |                                 |     |                                                                                                                                                                                                                                                                                                                                       |                                                           |
| 17 |                                 |     |                                                                                                                                                                                                                                                                                                                                       |                                                           |
| 18 |                                 |     |                                                                                                                                                                                                                                                                                                                                       |                                                           |
| 19 | <b>Methods: Monitoring</b>      |     |                                                                                                                                                                                                                                                                                                                                       |                                                           |
| 20 |                                 |     |                                                                                                                                                                                                                                                                                                                                       |                                                           |
| 21 | Data monitoring                 | 21a | Composition of data monitoring committee (DMC); summary of its role and reporting structure; statement of whether it is independent from the sponsor and competing interests; and reference to where further details about its charter can be found, if not in the protocol. Alternatively, an explanation of why a DMC is not needed | Please refer to the Protocol (page 11)                    |
| 22 |                                 |     |                                                                                                                                                                                                                                                                                                                                       |                                                           |
| 23 |                                 |     |                                                                                                                                                                                                                                                                                                                                       |                                                           |
| 24 |                                 |     |                                                                                                                                                                                                                                                                                                                                       |                                                           |
| 25 |                                 |     |                                                                                                                                                                                                                                                                                                                                       |                                                           |
| 26 |                                 | 21b | Description of any interim analyses and stopping guidelines, including who will have access to these interim results and make the final decision to terminate the trial                                                                                                                                                               | Please refer to the Protocol (page 28)                    |
| 27 |                                 |     |                                                                                                                                                                                                                                                                                                                                       |                                                           |
| 28 |                                 |     |                                                                                                                                                                                                                                                                                                                                       |                                                           |
| 29 | Harms                           | 22  | Plans for collecting, assessing, reporting, and managing solicited and spontaneously reported adverse events and other unintended effects of trial interventions or trial conduct                                                                                                                                                     | ____19____                                                |
| 30 |                                 |     |                                                                                                                                                                                                                                                                                                                                       |                                                           |
| 31 |                                 |     |                                                                                                                                                                                                                                                                                                                                       |                                                           |
| 32 |                                 |     |                                                                                                                                                                                                                                                                                                                                       |                                                           |
| 33 | Auditing                        | 23  | Frequency and procedures for auditing trial conduct, if any, and whether the process will be independent from investigators and the sponsor                                                                                                                                                                                           | Please refer to the Protocol (page 34)                    |
| 34 |                                 |     |                                                                                                                                                                                                                                                                                                                                       |                                                           |
| 35 |                                 |     |                                                                                                                                                                                                                                                                                                                                       |                                                           |
| 36 |                                 |     |                                                                                                                                                                                                                                                                                                                                       |                                                           |
| 37 | <b>Ethics and dissemination</b> |     |                                                                                                                                                                                                                                                                                                                                       |                                                           |
| 38 |                                 |     |                                                                                                                                                                                                                                                                                                                                       |                                                           |
| 39 | Research ethics approval        | 24  | Plans for seeking research ethics committee/institutional review board (REC/IRB) approval                                                                                                                                                                                                                                             | ____21____                                                |
| 40 |                                 |     |                                                                                                                                                                                                                                                                                                                                       |                                                           |
| 41 |                                 |     |                                                                                                                                                                                                                                                                                                                                       |                                                           |
| 42 |                                 |     |                                                                                                                                                                                                                                                                                                                                       |                                                           |
| 43 |                                 |     |                                                                                                                                                                                                                                                                                                                                       |                                                           |
| 44 |                                 |     |                                                                                                                                                                                                                                                                                                                                       |                                                           |
| 45 |                                 |     |                                                                                                                                                                                                                                                                                                                                       |                                                           |
| 46 |                                 |     |                                                                                                                                                                                                                                                                                                                                       |                                                           |



|    |                      |     |                                                                                                                 |                     |
|----|----------------------|-----|-----------------------------------------------------------------------------------------------------------------|---------------------|
| 1  | Protocol             | 25  | Plans for communicating important protocol modifications (eg, changes to eligibility criteria, outcomes,        | _____21_____        |
| 2  | amendments           |     | analyses) to relevant parties (eg, investigators, REC/IRBs, trial participants, trial registries, journals,     | Please also refer   |
| 3  |                      |     | regulators)                                                                                                     | to the Protocol     |
| 4  |                      |     |                                                                                                                 | (page 36)           |
| 5  |                      |     |                                                                                                                 |                     |
| 6  | Consent or assent    | 26a | Who will obtain informed consent or assent from potential trial participants or authorised surrogates, and      | _____6_____         |
| 7  |                      |     | how (see Item 32)                                                                                               |                     |
| 8  |                      |     |                                                                                                                 |                     |
| 9  |                      | 26b | Additional consent provisions for collection and use of participant data and biological specimens in ancillary  | Please refer to the |
| 10 |                      |     | studies, if applicable                                                                                          | Supplementary       |
| 11 |                      |     |                                                                                                                 | materials (page 2)  |
| 12 |                      |     |                                                                                                                 |                     |
| 13 | Confidentiality      | 27  | How personal information about potential and enrolled participants will be collected, shared, and maintained    | Please refer to the |
| 14 |                      |     | in order to protect confidentiality before, during, and after the trial                                         | Protocol (page 36)  |
| 15 |                      |     |                                                                                                                 |                     |
| 16 |                      |     |                                                                                                                 |                     |
| 17 | Declaration of       | 28  | Financial and other competing interests for principal investigators for the overall trial and each study site   | _____23-24_____     |
| 18 | interests            |     |                                                                                                                 |                     |
| 19 |                      |     |                                                                                                                 |                     |
| 20 | Access to data       | 29  | Statement of who will have access to the final trial dataset, and disclosure of contractual agreements that     | Please refer to the |
| 21 |                      |     | limit such access for investigators                                                                             | Protocol (page 35)  |
| 22 |                      |     |                                                                                                                 |                     |
| 23 | Ancillary and post-  | 30  | Provisions, if any, for ancillary and post-trial care, and for compensation to those who suffer harm from trial | Please refer to the |
| 24 | trial care           |     | participation                                                                                                   | Protocol (page 28)  |
| 25 |                      |     |                                                                                                                 |                     |
| 26 |                      |     |                                                                                                                 |                     |
| 27 | Dissemination policy | 31a | Plans for investigators and sponsor to communicate trial results to participants, healthcare professionals,     | _____20-21_____     |
| 28 |                      |     | the public, and other relevant groups (eg, via publication, reporting in results databases, or other data       |                     |
| 29 |                      |     | sharing arrangements), including any publication restrictions                                                   |                     |
| 30 |                      |     |                                                                                                                 |                     |
| 31 |                      | 31b | Authorship eligibility guidelines and any intended use of professional writers                                  | _____N/A_____       |
| 32 |                      |     |                                                                                                                 |                     |
| 33 |                      | 31c | Plans, if any, for granting public access to the full protocol, participant-level dataset, and statistical code | _____N/A_____       |
| 34 |                      |     |                                                                                                                 |                     |

35  
36 **Appendices**

37  
38  
39  
40  
41  
42  
43  
44  
45  
46

|   |                  |    |                                                                                                           |                     |
|---|------------------|----|-----------------------------------------------------------------------------------------------------------|---------------------|
| 1 | Informed consent | 32 | Model consent form and other related documentation given to participants and authorised surrogates        | Please refer to the |
| 2 | materials        |    |                                                                                                           | Consent form in     |
| 3 |                  |    |                                                                                                           | the Supplementary   |
| 4 |                  |    |                                                                                                           | files               |
| 5 |                  |    |                                                                                                           |                     |
| 6 | Biological       | 33 | Plans for collection, laboratory evaluation, and storage of biological specimens for genetic or molecular | Please refer to the |
| 7 | specimens        |    | analysis in the current trial and for future use in ancillary studies, if applicable                      | Supplementary       |
| 8 |                  |    |                                                                                                           | materials (page 2)  |
| 9 |                  |    |                                                                                                           |                     |

10  
11 \*It is strongly recommended that this checklist be read in conjunction with the SPIRIT 2013 Explanation & Elaboration for important clarification on the items.  
12 Amendments to the protocol should be tracked and dated. The SPIRIT checklist is copyrighted by the SPIRIT Group under the Creative Commons  
13 [“Attribution-NonCommercial-NoDerivs 3.0 Unported”](#) license.  
14  
15  
16  
17  
18  
19  
20  
21  
22  
23  
24  
25  
26  
27  
28  
29  
30  
31  
32  
33  
34  
35  
36  
37  
38  
39  
40  
41  
42  
43  
44  
45  
46

# BMJ Open

## Effects of adjunctive brexpiprazole on sleep-wake and circadian parameters in youth with depressive disorders: Study protocol for a clinical trial

|                                 |                                                                                                                                                                                                                                                                                                                                                                                                                                                                                                                                                                                                                                                                                                                                                                                                                                                                                                                                            |
|---------------------------------|--------------------------------------------------------------------------------------------------------------------------------------------------------------------------------------------------------------------------------------------------------------------------------------------------------------------------------------------------------------------------------------------------------------------------------------------------------------------------------------------------------------------------------------------------------------------------------------------------------------------------------------------------------------------------------------------------------------------------------------------------------------------------------------------------------------------------------------------------------------------------------------------------------------------------------------------|
| Journal:                        | <i>BMJ Open</i>                                                                                                                                                                                                                                                                                                                                                                                                                                                                                                                                                                                                                                                                                                                                                                                                                                                                                                                            |
| Manuscript ID                   | bmjopen-2021-056298.R2                                                                                                                                                                                                                                                                                                                                                                                                                                                                                                                                                                                                                                                                                                                                                                                                                                                                                                                     |
| Article Type:                   | Protocol                                                                                                                                                                                                                                                                                                                                                                                                                                                                                                                                                                                                                                                                                                                                                                                                                                                                                                                                   |
| Date Submitted by the Author:   | 04-Aug-2022                                                                                                                                                                                                                                                                                                                                                                                                                                                                                                                                                                                                                                                                                                                                                                                                                                                                                                                                |
| Complete List of Authors:       | Carpenter, Joanne; University of Sydney Brain and Mind Research Institute, ; Zmicerevska, Natalia; The University of Sydney, Brain and Mind Centre Crouse, Jacob; The University of Sydney, Brain and Mind Centre Nichles, Alissa; The University of Sydney, Brain and Mind Centre Garland, Alexandra; The University of Sydney, Brain and Mind Centre Song, Yun; The University of Sydney, Brain and Mind Centre Wilson, Chloe; The University of Sydney Brain and Mind Centre Rohleder, Cathrin; The University of Sydney, Brain and Mind Centre McHugh, Catherine; The University of Sydney Leweke, F. Markus; The University of Sydney, Brain and Mind Centre Koethe, Dagmar; The University of Sydney, Brain and Mind Centre Scott, Elizabeth; The University of Sydney, Brain and Mind Centre; The University of Notre Dame Australia School of Medicine Sydney Campus Hickie, Ian; The University of Sydney, Brain and Mind Centre; |
| <b>Primary Subject Heading</b>: | Mental health                                                                                                                                                                                                                                                                                                                                                                                                                                                                                                                                                                                                                                                                                                                                                                                                                                                                                                                              |
| Secondary Subject Heading:      | Research methods, Mental health, Medical publishing and peer review                                                                                                                                                                                                                                                                                                                                                                                                                                                                                                                                                                                                                                                                                                                                                                                                                                                                        |
| Keywords:                       | MENTAL HEALTH, PSYCHIATRY, Depression & mood disorders < PSYCHIATRY, Neurobiology < NATURAL SCIENCE DISCIPLINES                                                                                                                                                                                                                                                                                                                                                                                                                                                                                                                                                                                                                                                                                                                                                                                                                            |
|                                 |                                                                                                                                                                                                                                                                                                                                                                                                                                                                                                                                                                                                                                                                                                                                                                                                                                                                                                                                            |

SCHOLARONE™  
Manuscripts

1  
2 1 **Effects of adjunctive brexpiprazole on sleep-wake and circadian parameters in youth with depressive**  
3  
4 2 **disorders: Study protocol for a clinical trial**

5 3  
6  
7 4  
8  
9 5 Joanne S Carpenter<sup>1</sup>, Natalia Zmicerevska<sup>1</sup>, Jacob J Crouse<sup>1</sup>, Alissa Nichles<sup>1</sup>, Alexandra Garland<sup>1</sup>, Yun Ju  
10 6 Christine Song<sup>1</sup>, Chloe Wilson<sup>1</sup>, Cathrin Rohleder<sup>1</sup>, Catherine M McHugh<sup>1</sup>, F Markus Leweke<sup>1</sup>, Dagmar  
11  
12 7 Koethe<sup>1</sup>, Elizabeth M Scott<sup>2</sup>, Ian B Hickie<sup>1</sup>

13 8  
14  
15 9  
16  
17 10 <sup>1</sup>Youth Mental Health and Technology Team, Brain and Mind Centre, University of Sydney, Sydney, NSW,  
18 Australia.

19 11  
20 12 <sup>2</sup>Notre Dame Medical School, Sydney, NSW, Australia

21 13  
22 14  
23  
24 15 **Corresponding author:**

25 16 Dr Jacob Crouse  
26  
27 17 Brain and Mind Centre, The University of Sydney  
28  
29 18 94 Mallet St, Camperdown, Sydney, NSW Australia, 2050  
30  
31 19 jacob.crouse@sydney.edu.au

32 20  
33 21  
34 22  
35 23  
36 24  
37 25  
38 26  
39 27  
40 28  
41 29  
42 30  
43 31  
44 32  
45 33  
46 34  
47 35  
48 36  
49 37  
50 38  
51 39  
52 40  
53 41  
54 42  
55 43  
56 44  
57 45  
58 46  
59 47  
60 48

Word Count: 4,190 (without Abstract, Article Summary, Tables 1 and 2)

## ABSTRACT

### Introduction

Sleep-wake and circadian disturbance is a key feature of mood disorders with a potential causal role and particular relevance to young people. Brexpiprazole is a second-generation antipsychotic medication with demonstrated efficacy as an adjunct to antidepressant treatment for Major Depressive Disorder (MDD) in adults, with preliminary evidence suggesting greater effectiveness in subgroups of depressed patients with sleep disturbances. This clinical trial aims to evaluate the relationships between changes in sleep-wake and circadian parameters and changes in depressive symptoms following adjunctive brexpiprazole treatment in young adults with MDD and sleep-wake disturbance.

### Methods and analysis

This study is designed as a 16 week (8 weeks active treatment, 8 weeks follow up) mechanistic, open-label, single-arm phase IV clinical trial and aims to recruit 50 young people aged 18 to 30 with MDD and sleep-wake cycle disturbance through an early intervention youth mental health clinic in Sydney, Australia. At baseline, participants will undergo multidimensional outcome assessment and subsequently receive 8 weeks of open-label treatment with brexpiprazole as adjunctive to their stable psychotropic medication. Following 4 weeks of treatment, clinical and self-report measures will be repeated. Ambulatory sleep-wake monitoring will be conducted continuously for the duration of treatment. After 8 weeks of treatment, all multidimensional outcome assessments will be repeated. Follow-up visits will be conducted 4 and 8 weeks after trial completion (including sleep-wake, clinical, and self-report assessments). Circadian rhythm biomarkers including salivary melatonin, cortisol, and core body temperature will be collected during an in-lab assessment. Additionally, metabolic, inflammatory, and genetic risk markers will be collected at baseline and after 8 weeks of treatment.

### Ethics and dissemination

This trial protocol has been approved by the Human Research Ethics Committee of the Sydney Local Health District (X19-0417 and 2019/ETH12986, Protocol Version v 1-3, dated 25.02.2021). The results of this study,

1  
2 62 in de-identified form, will be disseminated through publication in peer-reviewed journals, scholarly book  
3  
4 63 chapters, presentation at conferences and publication in conference proceedings.  
5

6 64  
7

## 8 65 **Trial Registration**

10 66 Australian New Zealand Clinical Trials Registry (ANZCTR) Number: ACTRN12619001456145p, Date 22  
12  
13 67 October, 2019.  
14

15 68  
16

## 17 69 **KEYWORDS:**

19 70 Mental health, adjunctive brexpiprazole, sleep-wake cycle, youth depression, body clock  
21  
22 71  
23

## 24 72 **ARTICLE SUMMARY**

### 26 73 **Strengths and limitations of this study**

- 29 74 • Use of a comprehensive battery that includes ecologically valid and laboratory based circadian  
30 assessments (alongside genetic, metabolic, and inflammatory markers) may provide greater insights  
31 75 into the antidepressant mechanisms of adjunctive brexpiprazole.  
32  
33 76
- 35 77 • Participants will receive a psychoeducational session about sleep and circadian rhythms, including  
37 information on how to improve their sleep-wake cycle based on their individual actigraphy data.  
38 78
- 40 79 • This trial focuses on ascertainment of the current 24-hour sleep-wake cycle and will not examine  
41 possible factors that may contribute to sleep/circadian disruption in the long term (e.g., stressors) or  
42 80 the physiologic properties of sleep.  
43  
44 81
- 46 82 • Some extraneous factors that influence the sleep-wake cycle and/or circadian rhythms (e.g., ambient  
48 temperature, natural light exposure) are not measured in this study.  
49 83  
50  
51  
52  
53  
54  
55  
56  
57  
58  
59  
60

## 84 INTRODUCTION

85 In young adults, major depressive disorder (MDD) is highly prevalent, recurrent, and comorbid with other  
86 mental and physical conditions, generating a substantial burden of disease and disability [1, 2]. While  
87 multiple psychological and pharmacological treatments are commonly provided, a large proportion of  
88 patients fail to respond to first-line psychotherapy or antidepressant treatments [3-10], and augmentation  
89 with a second generation antipsychotic is often recommended in these treatment-resistant cases [11, 12].  
90 Sleep-wake cycle disturbances are common features of depressive disorders, including insomnia [13-15],  
91 hypersomnia [16, 17], abnormal sleep duration [13, 14], and abnormal timing of 24-hour patterns of  
92 rest/activity [18, 19]. Moreover, abnormalities in biological circadian rhythms (e.g., melatonin) have been  
93 reported [20, 21], suggesting that in some cases sleep disturbances are accompanied or underpinned by  
94 disturbances of the underlying circadian system [22, 23].

95  
96 The human circadian system is controlled by a master oscillator in the brain's hypothalamus (suprachiasmatic  
97 nucleus) which projects to circuits that govern bio-behavioural processes altered in depression (e.g., mood,  
98 vigilance, 24-hour sleep-wake cycle). The circadian system is primarily entrained by bright light, and its  
99 functioning can be disrupted by factors including aberrant light exposure and irregular sleep-wake  
100 behaviours [24, 25]. Adolescents and young adults are particularly vulnerable to circadian perturbations due  
101 to significant developmental changes in circadian rhythms across this age period [26], and sleep-wake phase  
102 delays are common in young people with depressive disorders [27]. Recently, we reported delayed and  
103 disrupted circadian rhythms in a subgroup of young people with depressive disorders (who also presented  
104 with greater symptom severity) [28]. During adolescence there is a phase shift in the circadian rhythm of the  
105 sleep-wake cycle, such that adolescents typically develop a bio-behavioural preference for going to sleep  
106 later and waking later (a manifestation of changes in the biology of the circadian system) [29, 30].  
107 Furthermore, there is some evidence that correction of circadian abnormalities is associated with  
108 antidepressant effects of treatments targeting the circadian system such as Agomelatine [31] and light  
109 therapy [32].

1  
2 110  
3  
4 111 Brexpiprazole is a second-generation antipsychotic with demonstrated efficacy by multiple randomised  
5  
6 112 controlled trials as an adjunct to antidepressant treatment in MDD in adults [33-36]; however the  
7  
8 113 mechanism of antidepressant action is unknown [37]. The pharmacodynamic properties of brexpiprazole,  
9  
10  
11 114 together with evidence from preclinical studies, suggest that there may be specific effects on anxiety,  
12  
13 115 cognition, and sleep [37, 38]. Further, there is preliminary evidence to suggest that brexpiprazole may  
14  
15 116 have greater effectiveness in subgroups of depressed patients with sleep disturbances, anxiety, or  
16  
17 117 irritability [22, 39]. As an adjunctive treatment in MDD patients with inadequate response to  
18  
19  
20 118 antidepressant treatment, brexpiprazole has been reported to lead to clinical improvement of sleep  
21  
22 119 disturbances (e.g., insomnia) and depressive symptoms, as well as improvement of daytime alertness and  
23  
24 120 functioning [40]. This pattern of changes is consistent with effects on circadian rhythms, with potential  
25  
26 121 influences on the entire 24-hour pattern of rest/activity, rather than simply on sleep period (in isolation).  
27  
28  
29 122 To improve the personalisation of treatment selection for mood disorders, a greater understanding of the  
30  
31 123 mechanisms of antidepressant action of specific compounds is needed.  
32

33 124  
34  
35 125 The goal of this clinical trial is to investigate whether the effect of brexpiprazole on depressive symptoms  
36  
37 126 is associated with changes in 24-hour sleep-wake or circadian parameters in young people with MDD.  
38  
39  
40 127 While disturbances in electrophysiological measures of sleep (e.g., REM sleep) have been considered to  
41  
42 128 represent biomarkers for depression [41-44], this trial focuses instead on the investigation and  
43  
44 129 measurement of bio-behavioural changes associated with the circadian system (e.g., rest/activity,  
45  
46 130 melatonin, cortisol, and core body temperature rhythms), rather than changes in electrophysiological  
47  
48  
49 131 sleep architecture (beyond the scope of this study).  
50

51 132

## 53 133 **METHODS AND ANALYSIS**

### 55 134 **Study objectives**

57  
58  
59  
60



1  
2 135 The primary objective of this study is to determine if changes in depressive symptoms following adjunctive  
3  
4 136 brexpiprazole treatment are correlated with changes in sleep-wake or circadian parameters in youth with  
5  
6 137 depressive disorders.

8  
9 138  
10  
11 139 The secondary objective is to determine if changes in social and occupational functioning following  
12  
13 140 adjunctive brexpiprazole are correlated with changes in sleep-wake or circadian parameters in youth with  
14  
15 141 depressive disorders.

17  
18 142  
19  
20 143 The tertiary objectives of this study are to determine if changes in depressive symptoms or changes in  
21  
22 144 sleep-wake or circadian parameters following adjunctive brexpiprazole treatment are associated with a  
23  
24 145 range of multidimensional outcome measures in youth with depressive syndromes [45] (e.g., other mental  
25  
26 146 illness symptoms, self-harm and suicidal thoughts and behaviours, physical health, alcohol/substance use,  
27  
28  
29 147 and genetic markers).

### 31 148 32 33 149 **Trial design**

34  
35 150 This investigator-initiated, mechanistic study involving 50 young people with depressive disorders and  
36  
37 151 sleep-wake cycle disturbances is designed as a 16-week (8 weeks active treatment, 8 weeks follow-up)  
38  
39  
40 152 open-label, single-arm, phase IV clinical trial.

### 41 42 153 43 44 154 **Participants**

45  
46 155 Participants aged 18-30 years with a diagnosis of MDD according to DSM-5 criteria on a current  
47  
48 156 antidepressant treatment of either selective serotonin reuptake inhibitor (SSRI) or serotonin-  
49  
50 157 norepinephrine reuptake inhibitor (SNRI) with a disrupted sleep-wake cycle will be recruited through the  
51  
52 158 youth mental health clinics associated with the Brain and Mind Centre (BMC), University of Sydney. All  
53  
54 159 participants will provide written informed consent. The research team will make explicit to any potential  
55  
56 160 participants both verbally and in writing (in the Participant Information Statement) that participation is  
57  
58 161 voluntary and will not affect the patient's care.

1  
2 162  
3  
4 163 The inclusion criteria for this trial are: (i) aged 18-30, (ii) diagnosis of MDD as per DSM-5 (Structured  
5  
6 164 Clinical Interview for DSM; SCID[46]) criteria, (iii) current major depressive episode of moderate severity  
7  
8  
9 165 as defined by a Quick Inventory of Depressive Symptomatology [47] rating  $\geq 11$  at two assessments two  
10  
11 166 weeks apart, (iv) failure to respond to at least one adequate (minimum four weeks) trial of  
12  
13 167 pharmacological treatment, (v) current antidepressant treatment with an SSRI or SNRI (including  
14  
15 168 citalopram, fluoxetine, paroxetine, sertraline, escitalopram, venlafaxine, desvenlafaxine, or duloxetine)  
16  
17 169 for at least 6 weeks, at a stable dose for two weeks prior to study commencement, and (vi) a perturbed  
18  
19  
20 170 sleep-wake cycle as evidenced by: delayed sleep onset; delayed sleep offset; disrupted sleep; high day-  
21  
22 171 to-day variability of sleep-wake cycle; non-restorative sleep; or daytime fatigue.

23  
24 172  
25  
26 173 Exclusion criteria are: (i) any adjunctive antipsychotic treatment for current episode in the past month, (ii)  
27  
28 174 use of medications which affect sleep, melatonin, circadian rhythms, or alertness (e.g., agomelatine,  
29  
30  
31 175 modafinil), (iii) primary psychotic disorder, (iv) acute suicidal behaviour (score of 6 on Comprehensive  
32  
33 176 Assessment of At-Risk Mental States item 7.3 [48], (v) evidence of a medical condition (primary,  
34  
35 177 respiratory, neurological) that could contribute to sleep-wake dysfunction, (vi) significant alcohol or  
36  
37  
38 178 substance misuse or dependence (assessed via DSM-5 SCID[46] and World Health Organisation Alcohol,  
39  
40 179 Smoking and Substance Involvement Screening Test [49, 50], (vii) shift work or (viii) recent transmeridian  
41  
42 180 travel (i.e., participants will be required to wait three days for each jet lag hour before entering the study),  
43  
44 181 (ix) previous hypersensitivity to brexpiprazole, (x) taking CYP2D6 or CYP3A4 inhibitors (or other  
45  
46 182 contraindicated medications listed in the Rexulti product information), and (xi) pregnancy or lactation.

47  
48  
49 183

#### 50 51 184 **Study course and procedure**

52  
53 185 Patients presenting for mental health care who may be eligible for the study will be screened by phone before  
54  
55 186 being invited to participate and attending an enrolment visit. The enrolment visit will formally assess  
56  
57  
58 187 eligibility criteria and confirm the presence of MDD as per DSM-5 (SCID)[46]. Participants will be provided  
59  
60

1  
2 188 with an actigraphy device (non-invasive wrist-worn device used to objectively measure rest/activity patterns)  
3  
4 189 and will be given instructions to wear the device for the following two-week period.  
5

6 190  
7  
8  
9 191 *Visit 1 (Baseline):* Within two weeks of completing the diagnostic and screening assessments, data from  
10  
11 192 the actigraphy device will be downloaded and reviewed. A further assessment of depressive symptom  
12  
13 193 severity (QIDS Clinician-Rated; QIDS-CR)[47] will be conducted to ensure participants meet all inclusion  
14  
15 194 criteria. Bloods will be collected for assessment of metabolic and inflammatory measures and genomic  
16  
17 195 analysis. Clinical and self-report assessments will be conducted, as well as circadian assessments in which  
18  
19  
20 196 participants will remain in the sleep lab overnight. The following morning, participants will attend a 1-  
21  
22 197 hour psychoeducation session about sleep and circadian rhythms covering the following topics: i) sleep  
23  
24 198 and circadian education with tailored discussion based on their personal actigraphy data; ii) individualized  
25  
26 199 plan for progressive sleep rescheduling; and iii) lifestyle factors and behaviours impacting on sleep (e.g.,  
27  
28  
29 200 exercise, light, sleep environment, sleep regulation, foods, stress, anxiety, mood).  
30

31 201  
32  
33 202 Once all baseline clinical and self-report assessments have been conducted, and the medical assessment  
34  
35 203 completed by the study doctor to confirm inclusion and exclusion criteria, participants will be issued with  
36  
37 204 the study medication to receive 8 weeks of open-label pharmacotherapy with brexpiprazole (REXULTI®-  
38  
39  
40 205 Lundbeck) as adjunctive to their stable psychotropic medication (treatment as usual). Brexpiprazole will  
41  
42 206 be provided to participants at Visit 1 (Baseline) and Visit 2 (Week 4) for the following four weeks and will  
43  
44 207 be titrated from 1 mg once daily in week 1, to 2 mg once daily in weeks 2-8.  
45

46  
47 208  
48  
49 209 Patients will receive 2mg/day, once daily as tablets, for oral use. The brexpiprazole dosage will be steadily  
50  
51 210 increased from 1mg/day during week 1, to 2mg/day during weeks 2-8 (up-titration). This is the dosage and  
52  
53 211 titration regime recommended for adjunctive use in major depression by the Federal Drug Administration  
54  
55 212 (USA). Several previous clinical trials have used this titration regime from 1mg to 2mg [34, 40, 51], and a  
56  
57  
58 213 dose of 2mg has been shown to be effective in reducing depressive symptoms [33]. As doses higher than  
59  
60

1  
2 214 2mg have been shown to increase incidence of akathisia [37], a maximum dose of 2mg will be used in the  
3  
4 215 present study to minimise side effects.  
5  
6 216  
7  
8  
9 217 *Monitoring visits:* Participants will be contacted by telephone on a weekly basis for the duration of the 8-  
10  
11 218 week treatment period to monitor adverse events and adherence. Any changes in concomitant  
12  
13 219 medications will also be investigated and recorded. In addition, participants will be provided with a  
14  
15 220 medication diary and asked to complete during the study to monitor adherence. More detailed  
16  
17  
18 221 information about potential side-effects will be further assessed by the study doctor at visits 2, 3, 4 and 5  
19  
20 222 using the UKU Side Effect Rating Scale [52], Abnormal Involuntary Movement Scale (AIMS) [53] and the  
21  
22 223 Simpson-Angus Scale (SAS) [54] for evaluation of extrapyramidal symptoms (EPS).  
23  
24  
25 224  
26  
27 225 *Visit 2 (Week 4):* Following four weeks of the treatment phase, participants will return for clinical and self-  
28  
29 226 report assessments to assess changes in clinical and functional measures.  
30  
31 227  
32  
33 228 *Visit 3 (Week 8):* Following eight weeks of the treatment phase, participants will return to complete clinical  
34  
35 229 and self-report assessments and will also complete a second circadian (overnight) in-lab assessment.  
36  
37  
38 230 Bloods will be collected at this visit for follow-up metabolic and inflammatory markers. Participants will  
39  
40 231 continue to be provided the brexpiprazole for up to 12 months following completion of the treatment  
41  
42 232 phase as clinically indicated, at the discretion of their treating clinician. Analyses will account for whether  
43  
44 233 participants have continued or discontinued the medication during the follow-up period.  
45  
46  
47 234  
48  
49 235 *Visit 4 and 5 (Follow-up visits 1 and 2, 12 and 16 weeks respectively):* Twelve and sixteen weeks after  
50  
51 236 commencing treatment (i.e., four and eight weeks after completing the eight-week treatment period  
52  
53 237 respectively), participants will return to complete clinical and self-report assessments. Participants will be  
54  
55 238 provided with an actigraphy device to wear for two weeks prior to these assessments.  
56  
57  
58 239  
59  
60

240 Participants will be reimbursed for their time and the cost of transportation to and from the research sites.

**Outcomes**

243 Outcome measures are summarized in Table 1.

**Primary outcomes**

246 The primary endpoint will be the correlation between change in sleep-wake and circadian parameters and  
 247 change in depressive symptoms from baseline to week eight. Sleep items in the primary depressive symptom  
 248 measures (QIDS-CR total score, QIDS-Self Report (QIDS-SR) total score, The Montgomery-Åsberg Depression  
 249 Rating Scale (MADRS) total score) will be removed in analyses to provide a measure of depressive symptoms  
 250 not biased by changes in sleep-wake parameters.

**Secondary outcomes**

253 The secondary endpoint will be correlation between change in sleep-wake and circadian parameters and  
 254 change in functioning from baseline to week eight.

**Tertiary outcomes**

257 Tertiary endpoints will be correlation between change in sleep-wake and circadian parameters and other  
 258 multidimensional outcome measures based on assessments of symptoms, self-harm and suicidal thoughts  
 259 and behaviours, physical health, and alcohol/substance use. Further tertiary endpoints will be comparison of  
 260 primary endpoints between Clinical Stages [55-58], illness trajectories [59], and genetic variants with  
 261 potential relevance to mood disorders and/or circadian rhythms (e.g. CLOCK, BMAL1).

**Table 1. Primary, secondary, and tertiary outcome measures.**

| Primary Outcome Measures                                                         | Secondary Outcome Measures | Tertiary Outcome measures |
|----------------------------------------------------------------------------------|----------------------------|---------------------------|
| (Correlation between change in sleep-wake and circadian parameters and change in |                            |                           |

|                                                                                                                                                                                                                                                                                                                                                                                                                                                                                                                                                                                                                                                                                                                                                                                                                                                                                                                                                                                                                                                                                                                                                                                                                                                                                                                                                                                                                                                                                                                                                                                                                                                                                                                   |                                                                                                                                                                                                                                                                                                                                                                                                                                                                        |                                                                                                                                                                                                                                                                                                                                                                                                                                                                                                                                                                                                                                                                                                                                                                                                                                                                                                                                                                                                                                                                                                                                                                                                                                                                                                                                                                                                                                                                                                                                                                                                                                                                                                                                                                                                  |
|-------------------------------------------------------------------------------------------------------------------------------------------------------------------------------------------------------------------------------------------------------------------------------------------------------------------------------------------------------------------------------------------------------------------------------------------------------------------------------------------------------------------------------------------------------------------------------------------------------------------------------------------------------------------------------------------------------------------------------------------------------------------------------------------------------------------------------------------------------------------------------------------------------------------------------------------------------------------------------------------------------------------------------------------------------------------------------------------------------------------------------------------------------------------------------------------------------------------------------------------------------------------------------------------------------------------------------------------------------------------------------------------------------------------------------------------------------------------------------------------------------------------------------------------------------------------------------------------------------------------------------------------------------------------------------------------------------------------|------------------------------------------------------------------------------------------------------------------------------------------------------------------------------------------------------------------------------------------------------------------------------------------------------------------------------------------------------------------------------------------------------------------------------------------------------------------------|--------------------------------------------------------------------------------------------------------------------------------------------------------------------------------------------------------------------------------------------------------------------------------------------------------------------------------------------------------------------------------------------------------------------------------------------------------------------------------------------------------------------------------------------------------------------------------------------------------------------------------------------------------------------------------------------------------------------------------------------------------------------------------------------------------------------------------------------------------------------------------------------------------------------------------------------------------------------------------------------------------------------------------------------------------------------------------------------------------------------------------------------------------------------------------------------------------------------------------------------------------------------------------------------------------------------------------------------------------------------------------------------------------------------------------------------------------------------------------------------------------------------------------------------------------------------------------------------------------------------------------------------------------------------------------------------------------------------------------------------------------------------------------------------------|
| depressive symptoms from baseline to week eight)                                                                                                                                                                                                                                                                                                                                                                                                                                                                                                                                                                                                                                                                                                                                                                                                                                                                                                                                                                                                                                                                                                                                                                                                                                                                                                                                                                                                                                                                                                                                                                                                                                                                  | (Correlation between change in sleep-wake and circadian parameters and change in functioning from baseline to week eight)                                                                                                                                                                                                                                                                                                                                              | (Correlation between change in sleep-wake and circadian parameters and other multidimensional outcome measures)                                                                                                                                                                                                                                                                                                                                                                                                                                                                                                                                                                                                                                                                                                                                                                                                                                                                                                                                                                                                                                                                                                                                                                                                                                                                                                                                                                                                                                                                                                                                                                                                                                                                                  |
| <p><b>Primary depressive symptom measures:</b></p> <ul style="list-style-type: none"> <li>• QIDS-CR total score (minus sleep items)</li> <li>• QIDS-Self Report (QIDS-SR) total score (minus sleep items)</li> <li>• The Montgomery-Åsberg Depression Rating Scale (MADRS) total score (minus sleep items)</li> </ul> <p><b>Sleep-wake and circadian variables:</b><br/>Actigraphy parameters (in the two-week period prior to baseline and prior to week eight):</p> <ul style="list-style-type: none"> <li>• Sleep onset time</li> <li>• Sleep offset (wake) time</li> <li>• Total sleep time (duration)</li> <li>• Wake after sleep onset (estimation of number of minutes awake during the sleep period)</li> <li>• Sleep efficiency (% of sleep period estimated as sleep)</li> <li>• Inter-daily stability</li> <li>• Intra-daily variability</li> </ul> <p><b>In-lab circadian measures:</b></p> <ul style="list-style-type: none"> <li>• Dim Light Melatonin Onset (DLMO) timing</li> <li>• Phase angle (time lapse) between DLMO and habitual sleep</li> <li>• Core body temperature nadir</li> <li>• Evening cortisol area under the curve</li> </ul> <p><b>Self-report measures:</b></p> <ul style="list-style-type: none"> <li>• Non-restorative sleep score (based on the Pittsburgh Sleep Quality Index (PSQI), and Munich Chronotype Questionnaire (MCTQ))</li> <li>• <i>Pittsburgh Sleep Quality Index</i> (PSQI) total score</li> <li>• Epworth Sleepiness Score (ESS) total score</li> <li>• Insomnia Severity Index (ISI) total score</li> <li>• Morningness -Eveningness Questionnaire (MEQ) total score*</li> <li>• Seasonal Pattern Assessment Questionnaire (SPAQ) total score*</li> </ul> | <p><b>Functioning measures:</b></p> <ul style="list-style-type: none"> <li>• Social and Occupational Functioning Assessment Scale (SOFAS) rating</li> <li>• The Work and Social Adjustment Scale (WSAS) total score</li> <li>• Adapted Schuster Social Support Scale (SSSS) total score</li> <li>• Not in Education, Employment, or Training (NEET) status</li> <li>• Number of days 'out of role' (unable to perform usual activities) in the past 30 days</li> </ul> | <p><b>Symptom measures:</b></p> <ul style="list-style-type: none"> <li>• Young Mania Rating Scale (YMRS) total score</li> <li>• Brief Psychiatric Rating Scale (BPRS) total score and subscale scores</li> <li>• Overall Anxiety Severity Impairment Scale (OASIS) total score</li> <li>• Altman Self-Rating Mania scale (ASRM) total score</li> <li>• Prodromal Questionnaire (brief version) (PQ-16) total score</li> <li>• DSM-5 Primary Care Post-Traumatic Stress Disorder screen (PC-PTSD-5) total score</li> <li>• Adapted Eating Disorder Examination (EDE) total score</li> <li>• Clinical Global Impressions scale (CGI) severity and improvement scores</li> </ul> <p><b>Self-harm and suicidal thoughts and behaviours:</b></p> <ul style="list-style-type: none"> <li>• Suicidal risk (score from Suicidal Ideation Attributes Scale (SIDAS) and Columbia- Suicide Severity Rating Scale (C-SSRS) items)</li> <li>• Adapted Brief Non-Suicidal Self-Injury Assessment Tool (B-NSSI-AT) total score</li> </ul> <p><b>Physical Health:</b></p> <ul style="list-style-type: none"> <li>• Body Mass Index (BMI) calculated from height and weight</li> <li>• Waist circumference</li> <li>• International Physical Activity Questionnaire (IPAQ) total score</li> <li>• Metabolic blood markers including triglycerides, cholesterol (total, Low Density Lipoprotein (LDL), High Density Lipoprotein (HDL)), and Homeostasis Model of Insulin Resistance (HOMA2-IR) calculated from fasting glucose and insulin measures</li> <li>• Inflammatory blood markers including Interleukin-1<math>\beta</math> (IL-1<math>\beta</math>), Interleukin-6 (IL-6), Tissue Necrosis Factor (TNF-<math>\alpha</math>), C-Reactive Protein (CRP)</li> </ul> <p><b>Alcohol and substance Use:</b></p> |

1  
2  
3  
4  
5  
6  
7  
8  
9  
10  
11  
12  
13  
14  
15  
16  
17  
18  
19  
20  
21  
22  
23  
24  
25  
26  
27  
28  
29  
30  
31  
32  
33  
34  
35  
36  
37  
38  
39  
40  
41  
42  
43  
44  
45  
46  
47  
48  
49  
50  
51  
52  
53  
54  
55  
56  
57  
58  
59  
60

|                                                                                            |  |                                                                                                                                                                                                                                                                                                                                                                                                                                                                                                                                                                                                                                                       |
|--------------------------------------------------------------------------------------------|--|-------------------------------------------------------------------------------------------------------------------------------------------------------------------------------------------------------------------------------------------------------------------------------------------------------------------------------------------------------------------------------------------------------------------------------------------------------------------------------------------------------------------------------------------------------------------------------------------------------------------------------------------------------|
| <p>*Baseline scores will be used rather than change scores as these are trait measures</p> |  | <ul style="list-style-type: none"> <li>• World Health Organisation Alcohol, Smoking, and Substance Involvement Screening Test (WHO ASSIST) score for tobacco, and cannabis</li> <li>• Alcohol Use Disorders Identification Test-Consumption (AUDIT C) total score</li> <li>• WHO ASSIST alcohol-related impairment</li> <li>• Age of onset of alcohol use</li> </ul> <p><b>Comparison of primary endpoints between:</b></p> <ul style="list-style-type: none"> <li>• Clinical Stages</li> <li>• Illness Trajectories</li> <li>• Genetic variants with potential relevance to mood disorders and/or circadian rhythms (e.g., CLOCK, BMAL1).</li> </ul> |
|--------------------------------------------------------------------------------------------|--|-------------------------------------------------------------------------------------------------------------------------------------------------------------------------------------------------------------------------------------------------------------------------------------------------------------------------------------------------------------------------------------------------------------------------------------------------------------------------------------------------------------------------------------------------------------------------------------------------------------------------------------------------------|

**Assessments**

Assessments used here are based on the multidimensional assessment and outcomes framework [45] and include clinical and self-report ratings of mental health symptoms, social and occupational functioning, self-harm, suicidal thoughts and behaviours, physical health, alcohol and substance use, illness type, stage and trajectory, as well as circadian parameters and metabolic, inflammatory and genetic markers. Our recent research [45, 60-62] indicates the capacity of the multidimensional outcomes framework to further our understanding of the pathophysiological mechanisms and illness progression in this cohort, as well as to inform more personalized and measurement-based models of care.

Diagnostic assessments

The presence of MDD and any comorbidity will be evaluated using the Structured Clinical Interview for DSM-5 Axis I Disorders (SCID) [46] (30-75 minutes to complete).

Mental risk assessment

Acute suicidal behaviour will be assessed by relevant subscale of the Comprehensive Assessment of At-Risk Mental States (CAARMS) [48] (5 minutes to complete).

1  
2 282 Clinical assessments

3  
4 283 The clinical interview is expected to take around 35 minutes to complete.

5  
6 284 1. *Clinical-rated Quick Inventory of Depressive Symptomatology (QIDS-CR)* [47]: assesses the nine  
7  
8 285 criterion symptom domains designated by the DSM to diagnose a MDE.

9  
10  
11 286 2. *Montgomery-Åsberg Depression Rating Scale (MADRS)* [63]: will also be used to assess depressive  
12  
13 287 symptoms, to allow for direct comparisons with previous studies of brexpiprazole in MDD.

14  
15 288 3. *Young Mania Rating Scale (YMRS)* [64]: an 11-item, multiple-choice diagnostic questionnaire used to  
16  
17 289 measure severity of manic episodes.

18  
19  
20 290 4. *Brief Psychiatric Rating Scale (BPRS)* [65]: used to measure psychiatric symptoms (e.g., depression,  
21  
22 291 anxiety, hallucinations).

23  
24 292 5. *Social and Occupational Functioning Assessment Scale (SOFAS)* [66]: used to assess functioning on a  
25  
26 293 0-100 scale (lower scores suggesting greater impairment).

27  
28  
29 294 6. *Clinical Global Impressions scale (CGI)* [67]: used to measure of clinical improvement.

30  
31 295 7. Participants will also be rated on previously established *clinical stage* [55-58] and *illness trajectory*  
32  
33 296 [59] models on the basis of information collected throughout the clinical interview. The clinical staging  
34  
35 297 framework differentiates those in the earliest phases of mental health problems with non-specific  
36  
37 298 clinical presentations (stage 1a; 'help-seeking') from those at greater-risk with more specific, sub-  
38  
39 299 threshold presentations (stage 1b; 'attenuated syndromes') and those who have already reached a  
40  
41 300 threshold for a progressive or recurrent disorder meeting diagnostic criteria (stage 2, 3, or 4). The  
42  
43 301 illness trajectory model is a novel tripartite framework based on three proposed pathophysiological  
44  
45 302 pathways leading to youth-onset mental disorders: (i) neurodevelopmental-psychosis, (ii) circadian-  
46  
47 303 bipolar spectrum, and (iii) hyperarousal-anxious depression[68-70].

48  
49  
50  
51 304 8. *World Health Organisation (WHO) Alcohol, Smoking and Substance Involvement Screening Test (WHO-*  
52  
53 305 *ASSIST)* [49, 50]: a reliable, culturally adaptable, valid screener for problematic or risky substance use.

54  
55  
56 306  
57  
58 307 Self-report assessments

59  
60



1  
2 308 The self-report questionnaires are tailored to the individual (using skip logic) so the amount of time taken  
3  
4 309 to complete the questionnaire varies, but we estimate the assessment will take 45 minutes to complete.  
5  
6 310 1. *Demographics and Mental Health History*: including details of work and education, physical health  
7  
8 311 (height, weight, waist circumference), history of mental health, and family history  
9  
10  
11 312 2. *International Physical Activity Questionnaire (IPAQ) - short version [71, 72]*: 7-item questionnaire  
12  
13 313 providing internationally comparable data on health-related physical activity.  
14  
15 314 3. *Alcohol Use Disorders Identification Test – Consumption (AUDIT-C) [73]*: includes three short  
16  
17 315 questions that estimate alcohol consumption in a standard, meaningful, non-judgmental manner.  
18  
19 Additional questions assessing age of onset of alcohol consumption will also be used.  
20 316  
21  
22 317 4. *Suicidal Ideation Attributes Scale (SIDAS) [74]*: 5-item self-report questionnaire assessing the  
23  
24 318 frequency, controllability, closeness to attempt, distress, and interference with daily activities on a  
25  
26 319 10-point Likert scale over the past month.  
27  
28  
29 320 5. *Columbia-Suicide Severity Rating Scale (C-SSRS) [75]*: The scale comprises 3 sections: suicidal  
30  
31 321 ideation, intensity of ideation, and suicidal behaviour. A self-rating adaptation will be used in  
32  
33 322 combination with the SIDAS.  
34  
35 323 6. *Brief Non-Suicidal Self-Injury Assessment Tool (B-NSSI-AT) [76]*: designed to assess primary (such as  
36  
37 324 form, frequency, and function) and secondary (including but not limited to NSSI habituation;  
38  
39 contexts in which NSSI is practiced; and NSSI perceived life interference, treatment, and impacts)  
40 325  
41 NSSI characteristics.  
42 326  
43  
44 327 7. *Quick Inventory of Depressive Symptomatology – self-report (QIDS-SR) [77]*: a self-rating (SR) version  
45  
46 328 includes 16 questions with equivalent weightings (0-3) for each symptom item that assesses the nine  
47  
48 criterion symptom domains designated by the DSM-IV to diagnose a MDE.  
49 329  
50  
51 330 8. *Overall Anxiety Severity Impairment Scale (OASIS) [78]*: 5-item self-report measure used to assess  
52  
53 331 severity and impairment associated with any anxiety disorder or multiple anxiety disorders.  
54  
55 332 9. *Altman Self-Rating Mania Scale (ASRM) [79]*: 5-item self-rating scale designed to assess the presence  
56  
57 333 and/or severity of manic symptoms.  
58  
59  
60

- 1  
2 334 10. *Primary Care Post-Traumatic Stress Disorder Screen for DSM-5 (PC-PTSD-5)* [80]: 5-item screen  
3  
4 335 designed for use in primary care settings to identify respondents with probable PTSD.  
5  
6 336 11. *Prodromal Questionnaire (PQ-16)* [81]: self-report screen for use in secondary mental health care  
7  
8 337 services to select subjects for psychosis risk.  
9  
10  
11 338 12. *Eating Disorder Examination (EDE)* [82, 83]: comprises a range of health-related and demographic  
12  
13 339 questions, including present height and weight, and a detailed and comprehensive assessment of  
14  
15 340 symptoms, particularly binge eating. In this study, three eating disorder behaviours are assessed:  
16  
17 341 binge eating, purging, and strict dieting or fasting.  
18  
19  
20 342 13. *Sleep questions*: 7 questions regarding time falling asleep, waking up during weekdays and  
21  
22 343 weekends, hours of sleep, feelings when waking up. Sleep timing items are based on the Pittsburgh  
23  
24 344 Sleep Quality Index (PSQI) and Munich Chrono Type Questionnaire (MCTQ), while sleep quality items  
25  
26 345 are based on expert consensus in the literature.  
27  
28  
29 346 14. *Work and Social Adjustment Scale (WSAS)* [84]: 5-item scale of functional impairment attributable  
30  
31 347 to an identified problem.  
32  
33 348 15. *Schuster Social Support Scale (SSSS)* [85]: 15-item measure of social support used to examine an  
34  
35 349 individual's social relationships with others (relatives, friends, spouse) and the associated impact on  
36  
37 350 their emotional functioning  
38  
39  
40 351 16. *Additional sleep questionnaires*: participants will complete the BMC sleep-wake self-report  
41  
42 352 questionnaire battery including questions regarding ethnicity, caffeine consumption, menstrual  
43  
44 353 cycle, visual impairments, and non-restorative sleep, as well as the *Pittsburgh Sleep Quality*  
45  
46 354 *Inventory (PSQI)* [86], *Epworth Sleepiness Scale (ESS)* [87], *Insomnia Severity Index (ISI)* [88], *Horne-*  
47  
48 355 *Ostberg Morningness-Eveningness Questionnaire (MEQ)* [89], and the *Seasonal Patterns Assessment*  
49  
50 356 *Questionnaire (SPAQ)* [90].  
51  
52  
53 357

#### 54 358 **Sleep wake assessments**

55  
56 359 24-hour sleep-wake and circadian rest-activity parameters will be measured by actigraphy recordings.  
57  
58 360 Actigraphy is a non-invasive tool to objectively measure activity profiles used to estimate sleep and circadian  
59  
60

1  
2 361 patterns based on validated algorithms. Participants will be asked to complete a sleep diary and to wear an  
3  
4 362 actigraph (GENEActiv device; Activinsights, Kimbolton, UK) on the non-dominant wrist for at least 10 days  
5  
6 363 prior to commencing the study, and continuously for the 8-week treatment phase. The device is comfortable  
7  
8  
9 364 and easy to use, battery operated wrist-worn device, similar in appearance to Fitbit, designed to record and  
10  
11 365 provide data on movement, light, temperature and sleep patterns. The device will provide objective  
12  
13 366 monitoring of participants' 24-hour circadian rhythm, including their sleep onset and duration, rise time, any  
14  
15 367 night-time sleep interruptions, and activity patterns (see Table 1). The device allows for the outputting of  
16  
17 368 real-time raw measurement data for up to a month without charging. Instructions will be provided to  
18  
19  
20 369 participants on how to use the device upon their recruitment into the study. Two-week actigraphy recordings  
21  
22 370 will also be completed at the 12- and 16-week follow up assessments. GENEActiv devices have been validated  
23  
24 371 against several types of accelerometry-based activity monitors [91-94] as well as for sleep-wake scoring [95,  
25  
26 372 96]. For decades, actigraphy monitors like the GENEActiv devices have been used extensively in research to  
27  
28  
29 373 measure sleep and activity patterns in diverse clinical settings including sleep disorders, medical illnesses  
30  
31 374 (e.g., neurodegenerative diseases) and various major mental disorders [19, 97, 98].  
32

### 33 375 34 35 376 **In-lab circadian assessment**

36  
37  
38 377 Circadian rhythms will be measured in an evening/overnight recording period, including 24-hour rhythms  
39  
40 378 of salivary melatonin, salivary cortisol, and core body temperature (Table 1). Circadian assessments will  
41  
42 379 be performed in accordance with established dim light melatonin onset protocols [99-102].  
43

### 44 380 45 46 381 **Metabolic and inflammatory markers**

47  
48  
49 382 The following markers will be collected at baseline and 8-weeks follow up visits: (i) Triglycerides, (ii)  
50  
51 383 Cholesterol (including total, High Density Lipoprotein (HDL), and Low-Density Lipoprotein (LDL)), (iii)  
52  
53 384 Fasting glucose, (iv) Fasting insulin, (v) Interleukin (IL)-1 $\beta$ , (vi) IL-6, (vii) Tissue Necrosis Factor (TNF)- $\alpha$ , (viii)  
54  
55 385 C-Reactive Protein (CRP). Height, weight, and waist circumference will be recorded. Insulin resistance will  
56  
57  
58 386 be estimated based on paired fasting plasma glucose and insulin levels [103] by the updated homeostatic  
59  
60 387 model assessment (HOMA2-IR) using iHOMA2 software V.8.8 [104].

1  
2 388  
3  
4 389 **Genetics**  
5  
6 390 Additional blood (30mL) will be collected at baseline for assessment of genetic markers as per procedures  
7  
8 391 from the University of Queensland Human Studies Unit.  
9  
10  
11 392 The schedule of trial assessments is summarized in Table 2 and the participant timeline is presented in  
12  
13 393 Figure 1.

14  
15 39416  
17  
18 395 **Table 2. Schedule of assessments**

|                                                                    | Enrolment Visit | Visit 1<br>(Baseline) | Visit 2<br>(Week 4) | Visit 3<br>(Week 8) | Visit 4<br>(Follow-up 1) | Visit 5<br>(Follow-up 2) |
|--------------------------------------------------------------------|-----------------|-----------------------|---------------------|---------------------|--------------------------|--------------------------|
| <i>Study week</i>                                                  |                 | <i>0</i>              | <i>4</i>            | <i>8</i>            | <i>12</i>                | <i>16</i>                |
| Informed Consent                                                   | ✓               |                       |                     |                     |                          |                          |
| Inclusion/Exclusion Criteria                                       | ✓               | ✓                     |                     |                     |                          |                          |
| Diagnostic Assessment<br>(SCID)                                    | ✓               |                       |                     |                     |                          |                          |
| Mental Risk Assessment<br>(CAARMS)                                 | ✓               | ✓                     | ✓                   | ✓                   | ✓                        | ✓                        |
| Demographics and Mental<br>Illness History                         |                 | ✓                     |                     |                     |                          |                          |
| Clinical Assessment (QIDS-<br>CR, MADRS, YMRS, BPRS,<br>SOFAS)     |                 | ✓                     | ✓                   | ✓                   | ✓                        | ✓                        |
| Self-report Assessment                                             |                 | ✓                     | ✓                   | ✓                   | ✓                        | ✓                        |
| Sleep-wake Assessment<br>(actigraphy monitoring)                   |                 | ✓                     | ✓                   | ✓                   | ✓                        | ✓                        |
| In-lab Circadian Assessment                                        |                 | ✓                     |                     | ✓                   |                          |                          |
| Blood Sample Collection<br>(Metabolic and<br>Inflammatory Markers) |                 | ✓                     |                     | ✓                   |                          |                          |
| Safety, side-effects, and<br>adherence assessment                  |                 |                       | ✓                   | ✓                   | ✓                        | ✓                        |
| IP dispensing                                                      |                 | ✓                     | ✓                   | ✓*                  | ✓*                       | ✓*                       |
| IP return                                                          |                 |                       | ✓                   | ✓                   |                          |                          |

43 396 \* If clinically indicated, at the discretion of the treating clinician  
44  
45

46 397

47  
48 398 **Safety and side-effects monitoring**

49  
50 399 Studies have shown that brexpiprazole is generally well tolerated, with no unexpected or severe side  
51  
52 400 effects [33, 36, 105, 106]. Safety and tolerability of the investigational product (IP) will be closely  
53  
54 401 monitored throughout the trial. For the duration of the 8-week treatment period, weekly phone calls will  
55  
56 402 be conducted to monitor safety and elicit information regarding side effects and potential adverse events.  
57  
58 403 Any changes in concomitant medications will also be investigated and recorded. In addition, participants  
59  
60

1  
2 404 will be provided with a medication diary and asked to complete during the study to monitor tolerability  
3  
4 405 and adherence. According to the IP information, participants will be advised to not drive a car, operate  
5  
6 406 machinery, or do other dangerous activities until they know how the IP affects them, as it may induce  
7  
8  
9 407 drowsiness in some subjects.

10  
11 408  
12  
13 409 Further formal assessment of side effects and potential adverse events following the end of the treatment  
14  
15 410 phase will be conducted at the two follow-up visits (visit 4 and 5). At the baseline visit, participants will be  
16  
17  
18 411 informed that any serious negative side effects should be reported to the study doctor immediately and will  
19  
20 412 be provided with the relevant contact details to do so. All Adverse Events will be assessed for causality and  
21  
22 413 symptom severity according to the study protocol and followed up by the study doctor if required. In the  
23  
24 414 occurrence of a Serious Adverse Event, appropriate diagnostic and therapeutic measures will be taken and  
25  
26  
27 415 the participant will be kept under observation for as long as is medically indicated. The Principal Investigator  
28  
29 416 will then determine if the seriousness of the event warrants the removal of the participant from the study or  
30  
31 417 abandonment of the study. For serious side effects or medical problems, the patient may be taken  
32  
33 418 immediately to Royal Prince Alfred Hospital for treatment. The Principal Investigator will ensure that follow-  
34  
35  
36 419 up of the participant is appropriate to the nature of any event, and that it continues until resolution.

37  
38 420  
39  
40 421 Throughout the trial the study doctor will monitor participants for pregnancy. It is not currently included  
41  
42 422 in the protocol, but the trial Standard Operating Procedures manual explains that the study doctor will  
43  
44 423 give relevant contraception advice to participants based on the current IP information.

#### 45 46 47 424 48 49 425 **Sample size calculation**

50  
51 426 Sample size was determined based on a study of circadian changes in response to agomelatine [31] where  
52  
53 427 a coefficient of 0.54 was found for the correlation between change in DLMO and change in depressive  
54  
55  
56 428 symptoms. We conservatively estimated that the coefficient for brexpiprazole would be smaller (~0.35;  
57  
58 429 i.e., medium effect size), as effects on the circadian system may be less direct. Assuming  $\alpha=0.05$  and 80%  
59  
60 430 power for a one-tailed correlation analysis, a sample size of  $n=49$  is required to detect this effect.

1  
2 431  
3  
4 432 **Data analysis plan**

5  
6 433 Correlations will be performed between change scores (i.e., Visit 2 score minus Visit 1 score) for sleep and  
7  
8 434 circadian measures, and change scores for depressive symptoms. The intention-to-treat principle will be used  
9  
10  
11 435 for missing data (last observations carried forward). Before analysis, plots with outlier and normality statistics  
12  
13 436 will be generated for all variables to identify outliers and issues with variable distribution. Extreme outliers  
14  
15 437 ( $\pm 3$  z-scores) will be checked against source data and testing notes to verify whether they are the result of  
16  
17 438 an error in data entry or a specific issue during testing (e.g., equipment failure), with errors rectified. If not  
18  
19  
20 439 the result of data entry error, outliers will be curtailed. Pearson's or Spearman's correlations will be selected  
21  
22 440 to perform analyses based on normative or non-normative data distribution (significance level  $\alpha=0.05$ ).  
23  
24 441 Correlations will also be examined between other change scores to assess secondary and tertiary endpoints.  
25  
26 442 Further tertiary endpoints will be assessed by partial correlations comparing categorical variables.  
27  
28  
29 443

30  
31 444 **Patient and public involvement**

32  
33 445 Clinical professionals working with young people with mental health problems were invited to comment on  
34  
35 446 the study design and procedures. Findings will be disseminated to scientific, clinical, and wider communities.  
36  
37

38 447  
39  
40 448 **Ethics and dissemination**

41  
42  
43 449 This trial has been approved by the Human Research Ethics Committee of the Sydney Local Health District  
44  
45 450 (X19-0417 and 2019/ETH12986, Protocol Version v 1-3, dated 25.02.2021). The study will be conducted in  
46  
47 451 compliance with all stipulations of the protocol, the conditions of ethics committee approval, the NHMRC  
48  
49 452 National Statement on Ethical Conduct in Human Research and the Good Clinical Practice guidelines. The  
50  
51 453 results of this study will be disseminated as widely as possible into the scientific and broader community. This  
52  
53  
54 454 will include publication in peer-reviewed journals, scholarly book chapters, presentation at conferences and  
55  
56 455 publication in conference proceedings. Publications arising from this project will be deposited into an open  
57  
58 456 access institutional repository, where possible. Results will also be disseminated into the wider community in  
59  
60

1  
2 457 a format appropriate for a lay audience, through links including the BMC website and social media, as well as  
3  
4 458 newsletters.

5  
6 459  
7

### 9 460 **Figure 1. Study flow chart**

10  
11 461 Legend: This figure illustrates the study design and participant timeline from referral to the last follow up  
12  
13 462 visit, including withdrawal and safety procedures.

### 14 15 16 463 17 18 464 **TRIAL STATUS**

19  
20 465 Protocol ID: BMC-YMH-005-2018, Version: v 1-3, dated 25/02/2021.

21  
22 466 The trial has not commenced recruitment.  
23  
24  
25

### 26 467 **AUTHOR CONTRIBUTIONS**

27  
28 468 JSC and IBH conceived the study, led the proposal and protocol development. JSC wrote the trial protocol.

29  
30 469 AG drafted the first version of the manuscript. NZ drafted the final version of the manuscript with input from  
31  
32  
33 470 other authors. JSC, AG, AN, NZ, YJSS, CW, CR, JJC, CMM, FML, DK and EMS were all involved with modifications  
34  
35 471 to the design of the study and with drafting of this paper. All authors have read and approved the final  
36  
37 472 manuscript.  
38  
39  
40

### 41 473 **FUNDING**

42  
43 474 This investigator-initiated trial with Lundbeck compound is supported by Lundbeck Australia Pty Ltd.

44  
45 475 (award/grant number is not applicable).  
46  
47  
48 476  
49

### 50 477 **ACKNOWLEDGEMENTS**

51  
52 478 JJC is supported by a Breakthrough Mental Health Research Foundation Fellowship and a NHMRC Emerging  
53  
54 479 Leadership Fellowship (GNT2008197).  
55  
56  
57 480  
58

### 59 481 **COMPETING INTERESTS**

60

1  
2 482 Professor Ian Hickie is the Co-Director, Health and Policy at the Brain and Mind Centre (BMC) University of  
3  
4 483 Sydney, Australia. The BMC operates an early-intervention youth services at Camperdown under contract to  
5  
6 484 headspace. Professor Hickie has previously led community-based and pharmaceutical industry-supported  
7  
8  
9 485 (Wyeth, Eli Lilly, Servier, Pfizer, AstraZeneca) projects focused on the identification and better management  
10  
11 486 of anxiety and depression. He is the Chief Scientific Advisor to, and a 5% equity shareholder in, InnoWell Pty  
12  
13 487 Ltd. InnoWell was formed by the University of Sydney (45% equity) and PwC (Australia; 45% equity) to deliver  
14  
15 488 the \$30 M Australian Government-funded Project Synergy (2017-20) and to lead transformation of mental  
16  
17  
18 489 health services internationally through the use of innovative technologies.

19  
20 490  
21  
22 491 Associate Professor Elizabeth M Scott is the Medical Director, Young Adult Mental Health Unit, St Vincent's  
23  
24 492 Hospital Darlinghurst, Discipline Leader of Adult Mental Health, School of Medicine, University of Notre  
25  
26  
27 493 Dame, Research Affiliate, The University of Sydney and Consultant Psychiatrist. She has received honoraria  
28  
29 494 for educational seminars related to the clinical management of depressive disorders supported by Servier  
30  
31 495 and Eli-Lilly pharmaceuticals. She has participated in a national advisory board for the antidepressant  
32  
33 496 compound Pristiq, manufactured by Pfizer. She was the National Coordinator of an antidepressant trial  
34  
35 497 sponsored by Servier.

36  
37  
38 498  
39 499 Other authors declare no competing interests.

40  
41 500

#### 42 43 501 **DATA AVAILABILITY STATEMENT**

44  
45 502 As this trial has not commenced recruitment, no data is available at present. Once the dataset is generated,  
46  
47  
48 503 de-identified data may be made available from the corresponding author upon reasonable request.

49  
50 504

51  
52 505

53  
54 506

55  
56 507

57  
58 508

59  
60



1  
2 509  
3 510  
4 511  
5 512  
6 513  
7 514  
8 515  
9 516  
10 517  
11 518  
12 519  
13 520  
14 521  
15 522  
16 523  
17 524  
18 525  
19 526  
20 527  
21 528  
22 529  
23 530  
24 531  
25 532  
26 533  
27 534  
28 535  
29 536  
30 537  
31 538  
32 539  
33 540  
34 541  
35 542  
36 543  
37 544  
38 545  
39 546  
40 547  
41 548  
42 549  
43 550  
44 551  
45 552  
46 553  
47 554  
48 555  
49 556  
50 557  
51  
52  
53  
54  
55  
56  
57  
58  
59  
60

REFERENCES

1. Kessler, R.C., et al., *The global burden of mental disorders: An update from the WHO World Mental Health (WMH) Surveys*. *Epidemiologia e Psichiatria Sociale*, 2011. **18**(01): p. 23-33.
2. Gore, F.M., et al., *Global burden of disease in young people aged 10–24 years: A systematic analysis*. *The Lancet*, 2011. **377**(9783): p. 2093-2102.
3. Kennard, B.D., et al., *Remission and recovery in the Treatment for Adolescents with Depression Study (TADS): acute and long-term outcomes*. *Journal of the American Academy of Child & Adolescent Psychiatry*, 2009. **48**(2): p. 186-195.
4. March, J., et al., *Fluoxetine, cognitive-behavioral therapy, and their combination for adolescents with depression: Treatment for Adolescents With Depression Study (TADS) randomized controlled trial*. *Jama*, 2004. **292**(7): p. 807-820.
5. Rush, A.J., et al., *Acute and Longer-Term Outcomes in Depressed Outpatients Requiring One or Several Treatment Steps: A STAR\*D Report*. *American Journal of Psychiatry*, 2006. **163**: p. 1905-1917.
6. Murphy, S.E., et al., *The knowns and unknowns of SSRI treatment in young people with depression and anxiety: efficacy, predictors, and mechanisms of action*. *The Lancet Psychiatry*, 2021. **8**(9): p. 824-835.
7. Cuijpers, P., et al., *Psychotherapy for depression across different age groups: a systematic review and meta-analysis*. *JAMA psychiatry*, 2020. **77**(7): p. 694-702.
8. Wolpert, M., et al., *Strategies not accompanied by a mental health professional to address anxiety and depression in children and young people: a scoping review of range and a systematic review of effectiveness*. *The Lancet Psychiatry*, 2019. **6**(1): p. 46-60.
9. Eckshtain, D., et al., *Meta-analysis: 13-year follow-up of psychotherapy effects on youth depression*. *Journal of the American Academy of Child & Adolescent Psychiatry*, 2020. **59**(1): p. 45-63.
10. Bear, H.A., et al., *Systematic review and meta-analysis: outcomes of routine specialist mental health care for young people with depression and/or anxiety*. *Journal of the American Academy of Child & Adolescent Psychiatry*, 2020. **59**(7): p. 810-841.
11. Zhou, X., et al., *Comparative efficacy, acceptability, and tolerability of augmentation agents in treatment-resistant depression: systematic review and network meta-analysis*. *J Clin Psychiatry*, 2015. **76**(4): p. e487-98.
12. Fornaro, M., et al., *Brexiprazole for treatment-resistant major depressive disorder*. *Expert opinion on pharmacotherapy*, 2019. **20**(16): p. 1925-1933.
13. Benca, R.M., et al., *Sleep and psychiatric disorders: A meta-analysis*. *Archives of General Psychiatry*, 1992. **49**(8): p. 651-668.
14. van Mill, J.G., et al., *Insomnia and sleep duration in a large cohort of patients with major depressive disorder and anxiety disorders*. *Journal of Clinical Psychiatry*, 2010. **71**(3): p. 239-246.
15. Baglioni, C., et al., *Insomnia as a predictor of depression: A meta-analytic evaluation of longitudinal epidemiological studies*. *Journal of Affective Disorders*, 2011. **135**(1-3): p. 10-19.
16. Liu, X., et al., *Insomnia and hypersomnia associated with depressive phenomenology and comorbidity in childhood depression*. *Sleep*, 2007. **30**(1): p. 83-90.
17. Geoffroy, P.A., et al., *Insomnia and hypersomnia in major depressive episode: prevalence, sociodemographic characteristics and psychiatric comorbidity in a population-based study*. *Journal of Affective Disorders*, 2018. **226**: p. 132-141.
18. Merikangas, K.R., et al., *Real-time mobile monitoring of the dynamic associations among motor activity, energy, mood, and sleep in adults with bipolar disorder*. *JAMA psychiatry*, 2019. **76**(2): p. 190-198.

- 1  
2 558 19. Difrancesco, S., et al., *Sleep, circadian rhythm, and physical activity patterns in depressive and*  
3 559 *anxiety disorders: A 2-week ambulatory assessment study*. Depression and anxiety, 2019. **36**(10):  
4 560 p. 975-986.
- 5 561 20. Germain, A. and D.J. Kupfer, *Circadian rhythm disturbances in depression*. Human  
6 562 Psychopharmacology, 2008. **23**(7): p. 571-585.
- 8 563 21. Lanfumey, L., R. Mongeau, and M. Hamon, *Biological rhythms and melatonin in mood disorders*  
9 564 *and their treatments*. Pharmacology and Therapeutics, 2013. **138**(2): p. 176-184.
- 10 565 22. Krystal, A.D., et al., *Chronobiologic parameter changes in patients with major depressive disorder*  
11 566 *and sleep disturbance treated with adjunctive brexpiprazole: an open-label, flexible-dose,*  
12 567 *exploratory substudy*. Journal of Affective Disorders, 2020.
- 14 568 23. Carpenter, J.S., et al., *Circadian depression: A mood disorder phenotype*. Neuroscience &  
15 569 Biobehavioral Reviews, 2021. **126**: p. 79-101.
- 16 570 24. Ko, C.H. and J.S. Takahashi, *Molecular components of the mammalian circadian clock*. Human  
17 571 molecular genetics, 2006. **15**(suppl\_2): p. R271-R277.
- 19 572 25. Logan, R.W. and C.A. McClung, *Rhythms of life: circadian disruption and brain disorders across*  
20 573 *the lifespan*. Nature Reviews Neuroscience, 2019. **20**(1): p. 49-65.
- 21 574 26. Carpenter, J.S., R. Robillard, and I.B. Hickie, *Variations in the sleep-wake cycle from childhood*  
22 575 *to adulthood: Chronobiological perspectives*. ChronoPhysiology and Therapy, 2015. **5**: p. 37-49.
- 23 576 27. Robillard, R., et al., *Delayed sleep phase in young people with unipolar or bipolar affective*  
24 577 *disorders*. Journal of Affective Disorders, 2013. **145**(2): p. 260-263.
- 26 578 28. Robillard, R., et al., *Circadian rhythms and psychiatric profiles in young adults with unipolar*  
27 579 *depressive disorders*. Transl Psychiatry, 2018. **8**: p. 213.
- 28 580 29. Crowley, S.J., C. Acebo, and M.A. Carskadon, *Sleep, circadian rhythms, and delayed phase in*  
29 581 *adolescence*. Sleep medicine, 2007. **8**(6): p. 602-612.
- 31 582 30. Roenneberg, T., et al., *A marker for the end of adolescence*. Current biology, 2004. **14**(24): p.  
32 583 R1038-R1039.
- 33 584 31. Robillard, R., et al., *Parallel Changes in Mood and Melatonin Rhythm Following an Adjunctive*  
34 585 *Multimodal Chronobiological Intervention With Agomelatine in People With Depression: A*  
35 586 *Proof of Concept Open Label Study*. Front Psychiatry, 2018. **9**: p. 624.
- 37 587 32. Benedetti, F., et al., *Phase advance is an actimetric correlate of antidepressant response to sleep*  
38 588 *deprivation and light therapy in bipolar depression*. Chronobiology International, 2007. **24**(5): p.  
39 589 921-937.
- 40 590 33. Hobart, M., et al., *A Randomized, Placebo-Controlled Study of the Efficacy and Safety of Fixed-*  
41 591 *Dose Brexpiprazole 2 mg/d as Adjunctive Treatment of Adults With Major Depressive Disorder*. J  
42 592 Clin Psychiatry, 2018. **79**(4).
- 44 593 34. Bauer, M., et al., *A randomised, placebo-controlled 24-week study evaluating adjunctive*  
45 594 *brexpiprazole in patients with major depressive disorder*. Acta Neuropsychiatr, 2018: p. 1-9.
- 46 595 35. Thase, M.E., et al., *Adjunctive brexpiprazole 1 and 3 mg for patients with major depressive*  
47 596 *disorder following inadequate response to antidepressants: a phase 3, randomized, double-blind*  
48 597 *study*. J Clin Psychiatry, 2015. **76**(9): p. 1232-40.
- 50 598 36. Thase, M.E., et al., *Efficacy and safety of adjunctive brexpiprazole 2 mg in major depressive*  
51 599 *disorder: a phase 3, randomized, placebo-controlled study in patients with inadequate response to*  
52 600 *antidepressants*. J Clin Psychiatry, 2015. **76**(9): p. 1224-31.
- 54 601 37. Yoon, S., et al., *Adjunctive Brexpiprazole as a Novel Effective Strategy for Treating Major*  
55 602 *Depressive Disorder: A Systematic Review and Meta-Analysis*. Journal of Clinical  
56 603 Psychopharmacology, 2017. **37**: p. 46-53.
- 57 604 38. Citrome, L., T.B. Stensbol, and K. Maeda, *The preclinical profile of brexpiprazole: what is its*  
58 605 *clinical relevance for the treatment of psychiatric disorders?* Expert Rev Neurother, 2015. **15**(10):  
59 606 p. 1219-29.

- 1  
2 607 39. Beyer, J.L. and R.H. Weisler, *Adjunctive brexpiprazole for the treatment of major depressive*  
3 608 *disorder*. *Expert Opin Pharmacother*, 2016. **17**(17): p. 2331-2339.
- 4 609 40. Krystal, A.D., et al., *Effects of Adjunctive Brexpiprazole on Sleep Disturbances in Patients With*  
5 610 *Major Depressive Disorder: An Open-Label, Flexible-Dose, Exploratory Study*. *Prim Care*  
6 611 *Companion CNS Disord*, 2016. **18**(5).
- 8 612 41. Pillai, V., D.A. Kalmbach, and J.A. Ciesla, *A meta-analysis of electroencephalographic sleep in*  
9 613 *depression: evidence for genetic biomarkers*. *Biological psychiatry*, 2011. **70**(10): p. 912-919.
- 10 614 42. Palagini, L., et al., *REM sleep dysregulation in depression: state of the art*. *Sleep medicine reviews*,  
11 615 2013. **17**(5): p. 377-390.
- 13 616 43. Wang, Y.-Q., et al., *The neurobiological mechanisms and treatments of REM sleep disturbances*  
14 617 *in depression*. *Current neuropharmacology*, 2015. **13**(4): p. 543-553.
- 15 618 44. Zhang, Y., et al., *Polysomnographically measured sleep changes in idiopathic REM sleep behavior*  
16 619 *disorder: A systematic review and meta-analysis*. *Sleep Medicine Reviews*, 2020. **54**: p. 101362.
- 18 620 45. Hickie, I.B., et al., *Right care, first time: a highly personalised and measurement-based care model*  
19 621 *to manage youth mental health*. *Medical Journal of Australia*, 2019. **211**(S9): p. S3-S46.
- 20 622 46. American Psychiatric Association, *Diagnostic and statistical manual of mental disorders*. 5th ed.  
21 623 2013, Arlington, VA: American Psychiatric Pub.
- 22 624 47. Rush, A.J., et al., *The 16-Item quick inventory of depressive symptomatology (QIDS), clinician*  
23 625 *rating (QIDS-C), and self-report (QIDS-SR): a psychometric evaluation in patients with chronic*  
24 626 *major depression*. *Biological Psychiatry*, 2003. **54**(5): p. 573-583.
- 26 627 48. Yung, A.R., et al., *Mapping the onset of psychosis: the Comprehensive Assessment of At-Risk*  
27 628 *Mental States*. *Australian and New Zealand Journal of Psychiatry*, 2005. **39**: p. 964-971.
- 28 629 49. WHO ASSIST Working Group, *The Alcohol, Smoking and Substance Involvement Screening Test*  
29 630 *(ASSIST): development, reliability and feasibility*. *Addiction*, 2002. **97**(9): p. 1183-94.
- 31 631 50. Humeniuk, R., et al., *Validation of the Alcohol, Smoking And Substance Involvement Screening*  
32 632 *Test (ASSIST)*. *Addiction*, 2008. **103**(6): p. 1039-47.
- 33 633 51. Fava, M., et al., *Adjunctive Brexpiprazole in Patients With Major Depressive Disorder and*  
34 634 *Irritability: An Exploratory Study*. *J Clin Psychiatry*, 2016. **77**(12): p. 1695-1701.
- 36 635 52. Lingjaerde, O., et al., *The UKU side effect rating scale: a new comprehensive rating scale for*  
37 636 *psychotropic drugs and a cross-sectional study of side effects in neuroleptic-treated patients*. *Acta*  
38 637 *Psychiatrica Scandinavica*, 1987. **76**.
- 39 638 53. Guy, W.A., *Abnormal Involuntary Movement Scale (AIMS)*, in *ECDEU Assessment Manual for*  
40 639 *Psychopharmacology*. 1976, U.S. Department of Health Education and Welfare: Washington, DC  
41 640 p. 534-537.
- 43 641 54. Simpson, G.M. and J.W.S. Angus, *A rating scale for extrapyramidal side effects*. *Acta Psychiatrica*  
44 642 *Scandinavica*, 1970. **45**: p. 11-19.
- 45 643 55. Hickie, I.B., et al., *Applying clinical staging to young people who present for mental health care*.  
46 644 *Early Intervention in Psychiatry*, 2013. **7**(1): p. 31-43.
- 48 645 56. McGorry, P.D., et al., *Clinical staging of psychiatric disorders: a heuristic framework for choosing*  
49 646 *earlier, safer and more effective interventions*. *Aust N Z J Psychiatry*, 2006. **40**(8): p. 616-22.
- 50 647 57. Scott, J., et al., *Clinical staging in psychiatry: a cross-cutting model of diagnosis with heuristic and*  
51 648 *practical value*. *British Journal of Psychiatry*, 2013. **202**(4): p. 243-245.
- 53 649 58. Hickie, I.B., J. Scott, and P.D. McGorry, *Clinical staging for mental disorders: a new development*  
54 650 *in diagnostic practice in mental health*. *Med J Aust*, 2013. **198**(9): p. 461-2.
- 55 651 59. Hickie, I.B., et al., *Evaluating differential developmental trajectories to adolescent-onset mood and*  
56 652 *psychotic disorders*. *BMC Psychiatry*, 2013. **13**: p. 303.
- 57 653 60. Crouse, J.J., et al., *Transdiagnostic neurocognitive subgroups and functional course in young*  
58 654 *people with emerging mental disorders: a cohort study*. *BJPsych Open*, 2020. **6**(2).
- 60



- 1  
2 655 61. Carpenter, J.S., et al., *Cohort profile: the Brain and Mind Centre Optymise cohort: tracking*  
3 656 *multidimensional outcomes in young people presenting for mental healthcare*. BMJ open, 2020.  
4 657 **10**(3): p. e030985.
- 5 658 62. Scott, E.M., et al., *Early intervention, prevention, and prediction in mood disorders: Tracking*  
7 659 *multidimensional outcomes in young people presenting for mental health care*, in *Personalized*  
8 660 *Psychiatry*. 2020, Elsevier. p. 39-62.
- 9 661 63. Montgomery, S.A. and S.A. Asberg, *A new depression scale designed to be sensitive to change*.  
10 662 *British Journal of Psychiatry*, 1979. **134**: p. 382-389.
- 11 663 64. Young, R., et al., *A rating scale for mania: reliability, validity and sensitivity*. *The British Journal*  
13 664 *of Psychiatry*, 1978. **133**(5).
- 14 665 65. Overall, J.E. and D.R. Gorham, *The brief psychiatric rating scale*. *Psychological Reports*, 1962. **10**:  
15 666 p. 799-812.
- 16 667 66. Goldman, H.H., A.E. Skodol, and T.R. Lave, *Revising axis V for DSM-IV: A review of measures of*  
17 668 *social functioning*. *American Journal of Psychiatry*, 1992. **149**(9): p. 1148-1156.
- 19 669 67. Busner, J. and S.D. Targum, *The clinical global impressions scale: applying a research tool in*  
20 670 *clinical practice*. *Psychiatry (Edgemont)*, 2007. **4**(7): p. 28.
- 21 671 68. Hickie, I.B., et al., *Evaluating differential developmental trajectories to adolescent-onset mood and*  
22 672 *psychotic disorders*. *BMC psychiatry*, 2013. **13**(1): p. 303.
- 24 673 69. Hickie, I.B., et al., *Right care, first time: a highly personalised and measurement-based care model*  
25 674 *to manage youth mental health*. *Medical Journal of Australia*, 2019. **211**: p. S3-S46.
- 26 675 70. Crouse, J.J., et al., *Circadian rhythm sleep-wake disturbances and depression in young people:*  
27 676 *implications for prevention and early intervention*. *The Lancet Psychiatry*, 2021. **8**(9): p. 813-823.
- 28 677 71. Craig, C.L., et al., *International physical activity questionnaire: 12-country reliability and validity*.  
30 678 *Med Sci Sports Exerc*, 2003. **35**(8): p. 1381-95.
- 31 679 72. Booth, M., *Assessment of physical activity: an international perspective*. *Res Q Exerc Sport*, 2000.  
32 680 **71**(2 Suppl): p. S114-20.
- 33 681 73. Bush, K., et al., *The AUDIT alcohol consumption questions (AUDIT-C): an effective brief*  
34 682 *screening test for problem drinking. Ambulatory Care Quality Improvement Project (ACQUIP).*  
36 683 *Alcohol Use Disorders Identification Test*. *Arch Intern Med*, 1998. **158**(16): p. 1789-95.
- 37 684 74. van Spijker, B.A., et al., *The suicidal ideation attributes scale (SIDAS): Community-based*  
38 685 *validation study of a new scale for the measurement of suicidal ideation*. *Suicide Life Threat Behav*,  
39 686 2014. **44**(4): p. 408-19.
- 40 687 75. Posner, K., et al., *The Columbia-Suicide Severity Rating Scale: initial validity and internal*  
42 688 *consistency findings from three multisite studies with adolescents and adults*. *Am J Psychiatry*,  
43 689 2011. **168**(12): p. 1266-77.
- 44 690 76. Whitlock, J., D. Exner-Cortens, and A. Purington, *Assessment of nonsuicidal self-injury:*  
45 691 *development and initial validation of the Non-Suicidal Self-Injury-Assessment Tool (NSSI-AT)*.  
47 692 *Psychol Assess*, 2014. **26**(3): p. 935-46.
- 48 693 77. Rush, A.J., et al., *The 16-Item Quick Inventory of Depressive Symptomatology (QIDS), clinician*  
49 694 *rating (QIDS-C), and self-report (QIDS-SR): a psychometric evaluation in patients with chronic*  
50 695 *major depression*. *Biol Psychiatry*, 2003. **54**(5): p. 573-83.
- 51 696 78. Norman, S.B., et al., *Development and validation of an Overall Anxiety Severity And Impairment*  
52 697 *Scale (OASIS)*. *Depress Anxiety*, 2006. **23**(4): p. 245-9.
- 54 698 79. Campbell-Sills, L., et al., *Validation of a brief measure of anxiety-related severity and impairment:*  
55 699 *the Overall Anxiety Severity and Impairment Scale (OASIS)*. *J Affect Disord*, 2009. **112**(1-3): p.  
56 700 92-101.
- 57 701 80. Prins, A., et al., *The Primary Care PTSD Screen for DSM-5 (PC-PTSD-5): Development and*  
58 702 *Evaluation Within a Veteran Primary Care Sample*. *J Gen Intern Med*, 2016. **31**(10): p. 1206-11.
- 59  
60

- 1  
2 703 81. Ising, H.K., et al., *The validity of the 16-item version of the Prodromal Questionnaire (PQ-16) to*  
3 704 *screen for ultra high risk of developing psychosis in the general help-seeking population.*  
4 705 Schizophr Bull, 2012. **38**(6): p. 1288-96.  
5 706 82. Hay, P.J., et al., *Eating disorder behaviors are increasing: findings from two sequential community*  
6 707 *surveys in South Australia.* PLoS One, 2008. **3**(2): p. e1541.  
7 708 83. Mitchison, D., et al., *The changing demographic profile of eating disorder behaviors in the*  
8 709 *community.* BMC Public Health, 2014. **14**: p. 943.  
9 710 84. Mundt, J.C., et al., *The Work and Social Adjustment Scale: a simple measure of impairment in*  
10 711 *functioning.* Br J Psychiatry, 2002. **180**: p. 461-4.  
11 712 85. Schuster, T.L., R.C. Kessler, and R.H. Aseltine, Jr., *Supportive interactions, negative interactions,*  
12 713 *and depressed mood.* Am J Community Psychol, 1990. **18**(3): p. 423-38.  
13 714 86. Buysse, D.J., et al., *The Pittsburgh Sleep Quality Index: A new instrument for psychiatric practice*  
14 715 *and research* Psychiatry Research, 1988. **28**: p. 193-213.  
15 716 87. Johns, M.W., *A new method for measuring daytime sleepiness: The Epworth sleepiness scale.*  
16 717 Sleep, 1991. **14**(6): p. 540-545.  
17 718 88. Bastien, C.H., A. Vallieres, and C.M. Morin, *Validation of the Insomnia Severity Index as an*  
18 719 *outcome measure for insomnia research.* Sleep Medicine, 2001. **2**: p. 297-307.  
19 720 89. Horne, J.A. and O. Ostberg, *A self-assessment questionnaire to determine morningness-*  
20 721 *eveningness in human circadian rhythms.* International Journal of Chronobiology, 1975. **4**(2): p.  
21 722 97-110.  
22 723 90. Rosenthal, N.E., et al., *Seasonal affective disorder and its relevance for the understanding and*  
23 724 *treatment of bulimia,* in *The Psychobiology of Bulimia,* J.I. Hudson and H.G. Pope, Editors. 1987,  
24 725 American Psychiatric Press: Washington, DC. p. 205-228.  
25 726 91. Schaefer, C.A., et al., *Establishing and evaluating wrist cutpoints for the GENEActiv accelerometer*  
26 727 *in youth.* Med Sci Sports Exerc, 2014. **46**(4): p. 826-33.  
27 728 92. Hildebrand, M., et al., *Age group comparability of raw accelerometer output from wrist- and hip-*  
28 729 *worn monitors.* Med Sci Sports Exerc, 2014. **46**(9): p. 1816-24.  
29 730 93. Esliger, D.W., et al., *Validation of the GENEActiv Accelerometer.* Med Sci Sports Exerc, 2011. **43**(6):  
30 731 p. 1085-93.  
31 732 94. van Hees, V.T., et al., *Separating movement and gravity components in an acceleration signal and*  
32 733 *implications for the assessment of human daily physical activity.* PLoS One, 2013. **8**(4): p. e61691.  
33 734 95. te Lindert, B.H. and E.J. Van Someren, *Sleep estimates using microelectromechanical systems*  
34 735 *(MEMS).* Sleep, 2013. **36**(5): p. 781-789.  
35 736 96. van Hees, V.T., et al., *A Novel, Open Access Method to Assess Sleep Duration Using a Wrist-Worn*  
36 737 *Accelerometer.* PLoS One, 2015. **10**(11): p. e0142533.  
37 738 97. Stone, J.E., et al., *Accuracy of the GENEActiv Device for Measuring Light Exposure in Sleep and*  
38 739 *Circadian Research.* Clocks & Sleep, 2020. **2**(2): p. 143-152.  
39 740 98. Pavey, T.G., et al., *The validity of the GENEActiv wrist-worn accelerometer for measuring adult*  
40 741 *sedentary time in free living.* Journal of science and medicine in sport, 2016. **19**(5): p. 395-399.  
41 742 99. Lewy, A.J. and R.L. Sack, *The dim light melatonin onset as a marker for circadian phase position.*  
42 743 Chronobiology International, 1989. **6**(1): p. 93-102.  
43 744 100. de Almeida, E.A., et al., *Measurement of melatonin in body fluids: standards, protocols and*  
44 745 *procedures.* Childs Nerv Syst, 2011. **27**(6): p. 879-91.  
45 746 101. Voultsios, A., D.J. Kennaway, and D. Dawson, *Salivary melatonin as a circadian phase marker:*  
46 747 *Validation and comparison to plasma melatonin.* Journal of Biological Rhythms, 1997. **12**(5): p.  
47 748 457-466.  
48 749 102. Pandi-Perumal, S.R., et al., *Dim Light Melatonin Onset (DLMO): A tool for the analysis of*  
49 750 *circadian phase in human sleep and chronobiological disorders.* Progress in Neuro-  
50 751 Psychopharmacology and Biological Psychiatry, 2007. **31**(1): p. 1-11.

- 1  
2 752 103. Wallace, T.M., J.C. Levy, and D.R. Matthews, *Use and Abuse of HOMA Modeling*. Diabetes Care, 2004. **27**(6): p. 1487-1495.  
3 753  
4 754 104. Hill, N., J. Levy, and D. Matthews, *Expansion of the Homeostasis Model Assessment of  $\beta$ -Cell Function and Insulin Resistance to Enable Clinical Trial Outcome Modeling Through the Interactive Adjustment of Physiology and Treatment Effects: iHOMA2*. Diabetes Care, 2013. **36**:  
5 755 p. 2324 - 2330.  
6 756  
7 757  
8 758 105. Lepola, U., et al., *Adjunctive brexpiprazole for elderly patients with major depressive disorder: An open-label, long-term safety and tolerability study*. International Journal of Geriatric Psychiatry, 2018. **33**(10): p. 1403-1410.  
9 759  
10 760  
11 761 106. Hakala, M., et al., *O7. 5. Long-term safety and tolerability of brexpiprazole in patients with schizophrenia*. Schizophrenia Bulletin, 2018. **44**(suppl\_1): p. S94-S95.  
12 762  
13 763  
14  
15  
16  
17  
18  
19  
20  
21  
22  
23  
24  
25  
26  
27  
28  
29  
30  
31  
32  
33  
34  
35  
36  
37  
38  
39  
40  
41  
42  
43  
44  
45  
46  
47  
48  
49  
50  
51  
52  
53  
54  
55  
56  
57  
58  
59  
60

For peer review only

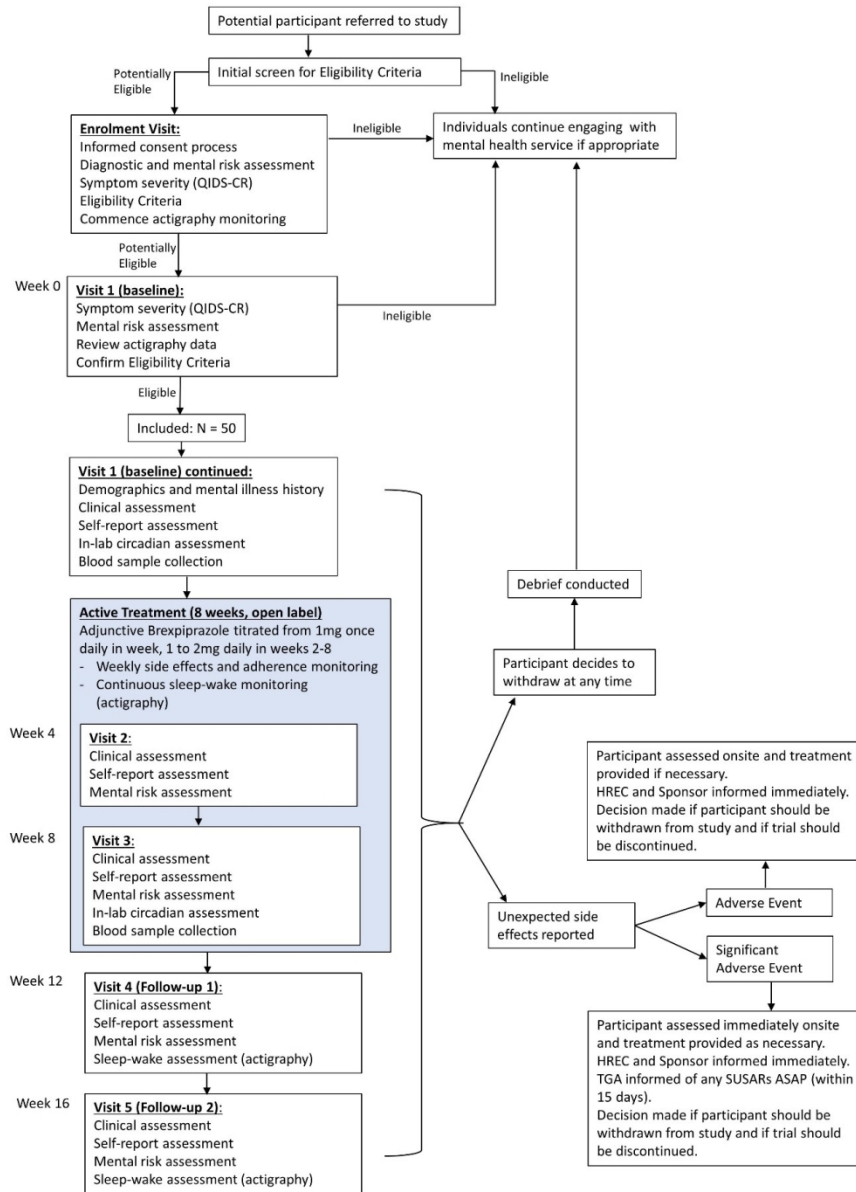

This figure illustrates the study design and participant timeline from referral to the last follow up visit, including withdrawal and safety procedures.

155x209mm (220 x 220 DPI)

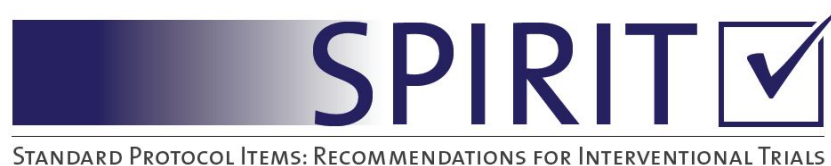

SPIRIT 2013 Checklist: Recommended items to address in a clinical trial protocol and related documents\*

| Section/item                      | Item No | Description                                                                                                                                                                                                                                                                              | Addressed on page number               |
|-----------------------------------|---------|------------------------------------------------------------------------------------------------------------------------------------------------------------------------------------------------------------------------------------------------------------------------------------------|----------------------------------------|
| <b>Administrative information</b> |         |                                                                                                                                                                                                                                                                                          |                                        |
| Title                             | 1       | Descriptive title identifying the study design, population, interventions, and, if applicable, trial acronym                                                                                                                                                                             | ___ 1 ___                              |
| Trial registration                | 2a      | Trial identifier and registry name. If not yet registered, name of intended registry                                                                                                                                                                                                     | ___ 3 ___                              |
|                                   | 2b      | All items from the World Health Organization Trial Registration Data Set                                                                                                                                                                                                                 | ___ 3 ___                              |
| Protocol version                  | 3       | Date and version identifier                                                                                                                                                                                                                                                              | ___ 2; 21 ___                          |
| Funding                           | 4       | Sources and types of financial, material, and other support                                                                                                                                                                                                                              | ___ 23 ___                             |
| Roles and responsibilities        | 5a      | Names, affiliations, and roles of protocol contributors                                                                                                                                                                                                                                  | ___ 1; 22-23 ___                       |
|                                   | 5b      | Name and contact information for the trial sponsor                                                                                                                                                                                                                                       | ___ 1 ___                              |
|                                   | 5c      | Role of study sponsor and funders, if any, in study design; collection, management, analysis, and interpretation of data; writing of the report; and the decision to submit the report for publication, including whether they will have ultimate authority over any of these activities | Please refer to the Protocol (page 37) |
|                                   | 5d      | Composition, roles, and responsibilities of the coordinating centre, steering committee, endpoint adjudication committee, data management team, and other individuals or groups overseeing the trial, if applicable (see Item 21a for data monitoring committee)                         | ___ N/A ___                            |



1 **Introduction**

2

3 Background and 6a Description of research question and justification for undertaking the trial, including summary of relevant \_\_\_ 4-5 \_\_\_  
 4 rationale studies (published and unpublished) examining benefits and harms for each intervention  
 5

6 6b Explanation for choice of comparators N/A as one arm  
 7 study  
 8

9 Objectives 7 Specific objectives or hypotheses \_\_\_ 5-6 \_\_\_  
 10

11 Trial design 8 Description of trial design including type of trial (eg, parallel group, crossover, factorial, single group),  
 12 allocation ratio, and framework (eg, superiority, equivalence, noninferiority, exploratory) \_\_\_ 6 \_\_\_  
 13  
 14

15 **Methods: Participants, interventions, and outcomes**

16

17 Study setting 9 Description of study settings (eg, community clinic, academic hospital) and list of countries where data will \_\_\_ 6 \_\_\_  
 18 be collected. Reference to where list of study sites can be obtained  
 19

20 Eligibility criteria 10 Inclusion and exclusion criteria for participants. If applicable, eligibility criteria for study centres and \_\_\_ 7 \_\_\_  
 21 individuals who will perform the interventions (eg, surgeons, psychotherapists)  
 22

23 Interventions 11a Interventions for each group with sufficient detail to allow replication, including how and when they will be \_\_\_ 7-9 \_\_\_  
 24 administered  
 25

26 11b Criteria for discontinuing or modifying allocated interventions for a given trial participant (eg, drug dose \_\_\_ 19 \_\_\_  
 27 change in response to harms, participant request, or improving/worsening disease)  
 28

29 11c Strategies to improve adherence to intervention protocols, and any procedures for monitoring adherence \_\_\_ 9; 18-19 \_\_\_  
 30 (eg, drug tablet return, laboratory tests)  
 31

32 11d Relevant concomitant care and interventions that are permitted or prohibited during the trial \_\_\_ 7 \_\_\_  
 33

34 Outcomes 12 Primary, secondary, and other outcomes, including the specific measurement variable (eg, systolic blood \_\_\_ 9-12 \_\_\_  
 35 pressure), analysis metric (eg, change from baseline, final value, time to event), method of aggregation (eg, \_\_\_ 9-12 \_\_\_  
 36 median, proportion), and time point for each outcome. Explanation of the clinical relevance of chosen  
 37 efficacy and harm outcomes is strongly recommended  
 38  
 39  
 40  
 41  
 42

|   |                      |    |                                                                                                                                                                                       |                                               |
|---|----------------------|----|---------------------------------------------------------------------------------------------------------------------------------------------------------------------------------------|-----------------------------------------------|
| 1 | Participant timeline | 13 | Time schedule of enrolment, interventions (including any run-ins and washouts), assessments, and visits for participants. A schematic diagram is highly recommended (see Figure)      | ____ 18 ____<br>Please also refer to Figure 1 |
| 2 |                      |    |                                                                                                                                                                                       |                                               |
| 3 |                      |    |                                                                                                                                                                                       |                                               |
| 4 |                      |    |                                                                                                                                                                                       |                                               |
| 5 | Sample size          | 14 | Estimated number of participants needed to achieve study objectives and how it was determined, including clinical and statistical assumptions supporting any sample size calculations | ____ 19-20 ____                               |
| 6 |                      |    |                                                                                                                                                                                       |                                               |
| 7 |                      |    |                                                                                                                                                                                       |                                               |
| 8 | Recruitment          | 15 | Strategies for achieving adequate participant enrolment to reach target sample size                                                                                                   | ____ 6 ____                                   |
| 9 |                      |    |                                                                                                                                                                                       |                                               |

11 **Methods: Assignment of interventions (for controlled trials)**

13 Allocation:

|    |                                  |     |                                                                                                                                                                                                                                                                                                                                                          |                               |
|----|----------------------------------|-----|----------------------------------------------------------------------------------------------------------------------------------------------------------------------------------------------------------------------------------------------------------------------------------------------------------------------------------------------------------|-------------------------------|
| 15 | Sequence generation              | 16a | Method of generating the allocation sequence (eg, computer-generated random numbers), and list of any factors for stratification. To reduce predictability of a random sequence, details of any planned restriction (eg, blocking) should be provided in a separate document that is unavailable to those who enrol participants or assign interventions | N/A as not a controlled trial |
| 16 |                                  |     |                                                                                                                                                                                                                                                                                                                                                          |                               |
| 17 |                                  |     |                                                                                                                                                                                                                                                                                                                                                          |                               |
| 18 |                                  |     |                                                                                                                                                                                                                                                                                                                                                          |                               |
| 19 |                                  |     |                                                                                                                                                                                                                                                                                                                                                          |                               |
| 20 | Allocation concealment mechanism | 16b | Mechanism of implementing the allocation sequence (eg, central telephone; sequentially numbered, opaque, sealed envelopes), describing any steps to conceal the sequence until interventions are assigned                                                                                                                                                | N/A as not a controlled trial |
| 21 |                                  |     |                                                                                                                                                                                                                                                                                                                                                          |                               |
| 22 |                                  |     |                                                                                                                                                                                                                                                                                                                                                          |                               |
| 23 |                                  |     |                                                                                                                                                                                                                                                                                                                                                          |                               |
| 24 |                                  |     |                                                                                                                                                                                                                                                                                                                                                          |                               |
| 25 | Implementation                   | 16c | Who will generate the allocation sequence, who will enrol participants, and who will assign participants to interventions                                                                                                                                                                                                                                | N/A as not a controlled trial |
| 26 |                                  |     |                                                                                                                                                                                                                                                                                                                                                          |                               |
| 27 |                                  |     |                                                                                                                                                                                                                                                                                                                                                          |                               |
| 28 | Blinding (masking)               | 17a | Who will be blinded after assignment to interventions (eg, trial participants, care providers, outcome assessors, data analysts), and how                                                                                                                                                                                                                | N/A as not a controlled trial |
| 29 |                                  |     |                                                                                                                                                                                                                                                                                                                                                          |                               |
| 30 |                                  |     |                                                                                                                                                                                                                                                                                                                                                          |                               |
| 31 |                                  | 17b | If blinded, circumstances under which unblinding is permissible, and procedure for revealing a participant's allocated intervention during the trial                                                                                                                                                                                                     | N/A as not a controlled trial |
| 32 |                                  |     |                                                                                                                                                                                                                                                                                                                                                          |                               |
| 33 |                                  |     |                                                                                                                                                                                                                                                                                                                                                          |                               |
| 34 |                                  |     |                                                                                                                                                                                                                                                                                                                                                          |                               |

35 **Methods: Data collection, management, and analysis**

|    |                         |     |                                                                                                                                                                                                                                                                                                                                                                                                              |                 |
|----|-------------------------|-----|--------------------------------------------------------------------------------------------------------------------------------------------------------------------------------------------------------------------------------------------------------------------------------------------------------------------------------------------------------------------------------------------------------------|-----------------|
| 37 | Data collection methods | 18a | Plans for assessment and collection of outcome, baseline, and other trial data, including any related processes to promote data quality (eg, duplicate measurements, training of assessors) and a description of study instruments (eg, questionnaires, laboratory tests) along with their reliability and validity, if known. Reference to where data collection forms can be found, if not in the protocol | ____ 12-17 ____ |
| 38 |                         |     |                                                                                                                                                                                                                                                                                                                                                                                                              |                 |
| 39 |                         |     |                                                                                                                                                                                                                                                                                                                                                                                                              |                 |
| 40 |                         |     |                                                                                                                                                                                                                                                                                                                                                                                                              |                 |
| 41 |                         |     |                                                                                                                                                                                                                                                                                                                                                                                                              |                 |
| 42 |                         |     |                                                                                                                                                                                                                                                                                                                                                                                                              |                 |

|    |                                 |     |                                                                                                                                                                                                                                                                                                                                       |                                                           |
|----|---------------------------------|-----|---------------------------------------------------------------------------------------------------------------------------------------------------------------------------------------------------------------------------------------------------------------------------------------------------------------------------------------|-----------------------------------------------------------|
| 1  |                                 | 18b | Plans to promote participant retention and complete follow-up, including list of any outcome data to be collected for participants who discontinue or deviate from intervention protocols                                                                                                                                             | Please refer to Figure 1                                  |
| 2  |                                 |     |                                                                                                                                                                                                                                                                                                                                       |                                                           |
| 3  |                                 |     |                                                                                                                                                                                                                                                                                                                                       |                                                           |
| 4  | Data management                 | 19  | Plans for data entry, coding, security, and storage, including any related processes to promote data quality (eg, double data entry; range checks for data values). Reference to where details of data management procedures can be found, if not in the protocol                                                                     | ____20____<br>Please also refer to the Protocol (page 35) |
| 5  |                                 |     |                                                                                                                                                                                                                                                                                                                                       |                                                           |
| 6  |                                 |     |                                                                                                                                                                                                                                                                                                                                       |                                                           |
| 7  |                                 |     |                                                                                                                                                                                                                                                                                                                                       |                                                           |
| 8  |                                 |     |                                                                                                                                                                                                                                                                                                                                       |                                                           |
| 9  | Statistical methods             | 20a | Statistical methods for analysing primary and secondary outcomes. Reference to where other details of the statistical analysis plan can be found, if not in the protocol                                                                                                                                                              | ____20____                                                |
| 10 |                                 |     |                                                                                                                                                                                                                                                                                                                                       |                                                           |
| 11 |                                 |     |                                                                                                                                                                                                                                                                                                                                       |                                                           |
| 12 |                                 |     |                                                                                                                                                                                                                                                                                                                                       |                                                           |
| 13 |                                 | 20b | Methods for any additional analyses (eg, subgroup and adjusted analyses)                                                                                                                                                                                                                                                              | ____N/A____                                               |
| 14 |                                 |     |                                                                                                                                                                                                                                                                                                                                       |                                                           |
| 15 |                                 | 20c | Definition of analysis population relating to protocol non-adherence (eg, as randomised analysis), and any statistical methods to handle missing data (eg, multiple imputation)                                                                                                                                                       | ____20____                                                |
| 16 |                                 |     |                                                                                                                                                                                                                                                                                                                                       |                                                           |
| 17 |                                 |     |                                                                                                                                                                                                                                                                                                                                       |                                                           |
| 18 |                                 |     |                                                                                                                                                                                                                                                                                                                                       |                                                           |
| 19 | <b>Methods: Monitoring</b>      |     |                                                                                                                                                                                                                                                                                                                                       |                                                           |
| 20 |                                 |     |                                                                                                                                                                                                                                                                                                                                       |                                                           |
| 21 | Data monitoring                 | 21a | Composition of data monitoring committee (DMC); summary of its role and reporting structure; statement of whether it is independent from the sponsor and competing interests; and reference to where further details about its charter can be found, if not in the protocol. Alternatively, an explanation of why a DMC is not needed | Please refer to the Protocol (page 11)                    |
| 22 |                                 |     |                                                                                                                                                                                                                                                                                                                                       |                                                           |
| 23 |                                 |     |                                                                                                                                                                                                                                                                                                                                       |                                                           |
| 24 |                                 |     |                                                                                                                                                                                                                                                                                                                                       |                                                           |
| 25 |                                 |     |                                                                                                                                                                                                                                                                                                                                       |                                                           |
| 26 |                                 | 21b | Description of any interim analyses and stopping guidelines, including who will have access to these interim results and make the final decision to terminate the trial                                                                                                                                                               | Please refer to the Protocol (page 28)                    |
| 27 |                                 |     |                                                                                                                                                                                                                                                                                                                                       |                                                           |
| 28 |                                 |     |                                                                                                                                                                                                                                                                                                                                       |                                                           |
| 29 | Harms                           | 22  | Plans for collecting, assessing, reporting, and managing solicited and spontaneously reported adverse events and other unintended effects of trial interventions or trial conduct                                                                                                                                                     | ____19____                                                |
| 30 |                                 |     |                                                                                                                                                                                                                                                                                                                                       |                                                           |
| 31 |                                 |     |                                                                                                                                                                                                                                                                                                                                       |                                                           |
| 32 |                                 |     |                                                                                                                                                                                                                                                                                                                                       |                                                           |
| 33 | Auditing                        | 23  | Frequency and procedures for auditing trial conduct, if any, and whether the process will be independent from investigators and the sponsor                                                                                                                                                                                           | Please refer to the Protocol (page 34)                    |
| 34 |                                 |     |                                                                                                                                                                                                                                                                                                                                       |                                                           |
| 35 |                                 |     |                                                                                                                                                                                                                                                                                                                                       |                                                           |
| 36 |                                 |     |                                                                                                                                                                                                                                                                                                                                       |                                                           |
| 37 | <b>Ethics and dissemination</b> |     |                                                                                                                                                                                                                                                                                                                                       |                                                           |
| 38 |                                 |     |                                                                                                                                                                                                                                                                                                                                       |                                                           |
| 39 | Research ethics approval        | 24  | Plans for seeking research ethics committee/institutional review board (REC/IRB) approval                                                                                                                                                                                                                                             | ____21____                                                |
| 40 |                                 |     |                                                                                                                                                                                                                                                                                                                                       |                                                           |
| 41 |                                 |     |                                                                                                                                                                                                                                                                                                                                       |                                                           |
| 42 |                                 |     |                                                                                                                                                                                                                                                                                                                                       |                                                           |
| 43 |                                 |     |                                                                                                                                                                                                                                                                                                                                       |                                                           |
| 44 |                                 |     |                                                                                                                                                                                                                                                                                                                                       |                                                           |
| 45 |                                 |     |                                                                                                                                                                                                                                                                                                                                       |                                                           |
| 46 |                                 |     |                                                                                                                                                                                                                                                                                                                                       |                                                           |

|    |                               |     |                                                                                                                                                                                                                                                                                     |                                                           |
|----|-------------------------------|-----|-------------------------------------------------------------------------------------------------------------------------------------------------------------------------------------------------------------------------------------------------------------------------------------|-----------------------------------------------------------|
| 1  | Protocol amendments           | 25  | Plans for communicating important protocol modifications (eg, changes to eligibility criteria, outcomes, analyses) to relevant parties (eg, investigators, REC/IRBs, trial participants, trial registries, journals, regulators)                                                    | ____21____<br>Please also refer to the Protocol (page 36) |
| 2  |                               |     |                                                                                                                                                                                                                                                                                     |                                                           |
| 3  |                               |     |                                                                                                                                                                                                                                                                                     |                                                           |
| 4  |                               |     |                                                                                                                                                                                                                                                                                     |                                                           |
| 5  |                               |     |                                                                                                                                                                                                                                                                                     |                                                           |
| 6  | Consent or assent             | 26a | Who will obtain informed consent or assent from potential trial participants or authorised surrogates, and how (see Item 32)                                                                                                                                                        | ____6____                                                 |
| 7  |                               |     |                                                                                                                                                                                                                                                                                     |                                                           |
| 8  |                               |     |                                                                                                                                                                                                                                                                                     |                                                           |
| 9  |                               |     |                                                                                                                                                                                                                                                                                     |                                                           |
| 10 |                               | 26b | Additional consent provisions for collection and use of participant data and biological specimens in ancillary studies, if applicable                                                                                                                                               | Please refer to the Supplementary materials (page 2)      |
| 11 |                               |     |                                                                                                                                                                                                                                                                                     |                                                           |
| 12 |                               |     |                                                                                                                                                                                                                                                                                     |                                                           |
| 13 |                               |     |                                                                                                                                                                                                                                                                                     |                                                           |
| 14 | Confidentiality               | 27  | How personal information about potential and enrolled participants will be collected, shared, and maintained in order to protect confidentiality before, during, and after the trial                                                                                                | Please refer to the Protocol (page 36)                    |
| 15 |                               |     |                                                                                                                                                                                                                                                                                     |                                                           |
| 16 |                               |     |                                                                                                                                                                                                                                                                                     |                                                           |
| 17 | Declaration of interests      | 28  | Financial and other competing interests for principal investigators for the overall trial and each study site                                                                                                                                                                       | ____23-24____                                             |
| 18 |                               |     |                                                                                                                                                                                                                                                                                     |                                                           |
| 19 |                               |     |                                                                                                                                                                                                                                                                                     |                                                           |
| 20 | Access to data                | 29  | Statement of who will have access to the final trial dataset, and disclosure of contractual agreements that limit such access for investigators                                                                                                                                     | Please refer to the Protocol (page 35)                    |
| 21 |                               |     |                                                                                                                                                                                                                                                                                     |                                                           |
| 22 |                               |     |                                                                                                                                                                                                                                                                                     |                                                           |
| 23 | Ancillary and post-trial care | 30  | Provisions, if any, for ancillary and post-trial care, and for compensation to those who suffer harm from trial participation                                                                                                                                                       | Please refer to the Protocol (page 28)                    |
| 24 |                               |     |                                                                                                                                                                                                                                                                                     |                                                           |
| 25 |                               |     |                                                                                                                                                                                                                                                                                     |                                                           |
| 26 |                               |     |                                                                                                                                                                                                                                                                                     |                                                           |
| 27 | Dissemination policy          | 31a | Plans for investigators and sponsor to communicate trial results to participants, healthcare professionals, the public, and other relevant groups (eg, via publication, reporting in results databases, or other data sharing arrangements), including any publication restrictions | ____20-21____                                             |
| 28 |                               |     |                                                                                                                                                                                                                                                                                     |                                                           |
| 29 |                               |     |                                                                                                                                                                                                                                                                                     |                                                           |
| 30 |                               |     |                                                                                                                                                                                                                                                                                     |                                                           |
| 31 |                               | 31b | Authorship eligibility guidelines and any intended use of professional writers                                                                                                                                                                                                      | ____N/A____                                               |
| 32 |                               |     |                                                                                                                                                                                                                                                                                     |                                                           |
| 33 |                               | 31c | Plans, if any, for granting public access to the full protocol, participant-level dataset, and statistical code                                                                                                                                                                     | ____N/A____                                               |
| 34 |                               |     |                                                                                                                                                                                                                                                                                     |                                                           |

35  
36 **Appendices**  
37  
38  
39  
40  
41  
42

|   |                  |    |                                                                                                           |                     |
|---|------------------|----|-----------------------------------------------------------------------------------------------------------|---------------------|
| 1 | Informed consent | 32 | Model consent form and other related documentation given to participants and authorised surrogates        | Please refer to the |
| 2 | materials        |    |                                                                                                           | Consent form in     |
| 3 |                  |    |                                                                                                           | the Supplementary   |
| 4 |                  |    |                                                                                                           | files               |
| 5 |                  |    |                                                                                                           |                     |
| 6 | Biological       | 33 | Plans for collection, laboratory evaluation, and storage of biological specimens for genetic or molecular | Please refer to the |
| 7 | specimens        |    | analysis in the current trial and for future use in ancillary studies, if applicable                      | Supplementary       |
| 8 |                  |    |                                                                                                           | materials (page 2)  |
| 9 |                  |    |                                                                                                           |                     |

10  
11 \*It is strongly recommended that this checklist be read in conjunction with the SPIRIT 2013 Explanation & Elaboration for important clarification on the items.  
12 Amendments to the protocol should be tracked and dated. The SPIRIT checklist is copyrighted by the SPIRIT Group under the Creative Commons  
13 "[Attribution-NonCommercial-NoDerivs 3.0 Unported](#)" license.  
14  
15  
16  
17  
18  
19  
20  
21  
22  
23  
24  
25  
26  
27  
28  
29  
30  
31  
32  
33  
34  
35  
36  
37  
38  
39  
40  
41  
42  
43  
44  
45  
46
